# Supplementary material for: Gold‐Catalyzed Atroposelective Synthesis of 1,1′‐Binaphthalene‐2,3′‐diols
Source: PubMed Central journal article supplement (PMC7155015; doi:10.1002/anie.201915456), 2020-01-23
Supplement: ANIE-59-5647-s001.pdf [file ANIE-59-5647-s001.pdf]

Supporting Information

**Gold-Catalyzed Atroposelective Synthesis of 1,1'-Binaphthalene-2,3'-diols**

*Jianwei Zhang, Martin Simon, Christopher Golz, and Manuel Alcarazo\**

anie\_201915456\_sm\_miscellaneous\_information.pdf

## Contents

|                                                                       |    |
|-----------------------------------------------------------------------|----|
| 1. General information                                                | 2  |
| 2. Optimization of reaction conditions                                | 3  |
| 3. General procedure for the synthesis of alkynones                   | 6  |
| 4. General procedure for the Au-catalyzed hydroarylation of alkynones | 21 |
| 5. Transformation of <b>4a</b> into <b>12</b>                         | 39 |
| 6. Crystal structure of <b>12</b>                                     | 43 |
| 7. References                                                         | 44 |
| 8. NMR spectra                                                        | 45 |
| 9. HPLC spectra                                                       | 99 |

## 1. General information

Unless otherwise noted, all experiments were carried out under an atmosphere of nitrogen using standard Schlenk techniques or in a nitrogen-filled glovebox. All NMR spectra were recorded on Bruker AV600, and AV400;  $^1\text{H}$  and  $^{13}\text{C}$  chemical shifts ( $\delta$ ) are given in ppm relative to TMS, using the solvent signals as references and converting the chemical shifts to the TMS scale.  $^{31}\text{P}$  and  $^{19}\text{F}$  chemical shifts ( $\delta$ ) are given in ppm relative to  $\text{H}_3\text{PO}_4$  and  $\text{CFCl}_3$  respectively (external standard). Coupling constants ( $J$ ) are given in Hz. All high resolution mass spectra were obtained on Finnigan MAT 95 (70 eV, EI), Finnigan LCQ (ESI) and APEX IV 7T FTICR, Bruker Daltonic (HRMS). For thin layer chromatography (TLC), Merck silica gel 60 F254 TLC plates were used, and compounds were visualized with a UV light at 254 nm. Chiral HPLC: the enantiomeric excesses of the products in catalysis reactions was determined using either a Shimadzu Nexera-*i* LC 2040 3D with integrated downstream UV/Vis PDA detector. Optical rotations were measured using Perkin Elmer 343 or Jasco P-2000 polarimeters at the stated temperature under a Na/Hg lamp,  $\lambda = 589 \text{ nm}$  ( $c$  in g/100 ml). Dry and degassed solvents were obtained by distillation over the appropriate drying agents and stored under nitrogen. Alternatively, dry solvents were obtained using an MBraun MB-SPS-800 solvent purification system (tetrahydrofuran, diethyl ether, toluene, pentane, dichloromethane, acetonitrile). All other chemicals were used as received from Aldrich or Acros without further purification. The catalysts were prepared according to the published method.<sup>[1]</sup> All substrates of alkynes were synthesized according to modified literature method.<sup>[2,3]</sup>

## 2. Optimization of reaction conditions

Table S1: Preliminary Experiments<sup>[a]</sup>

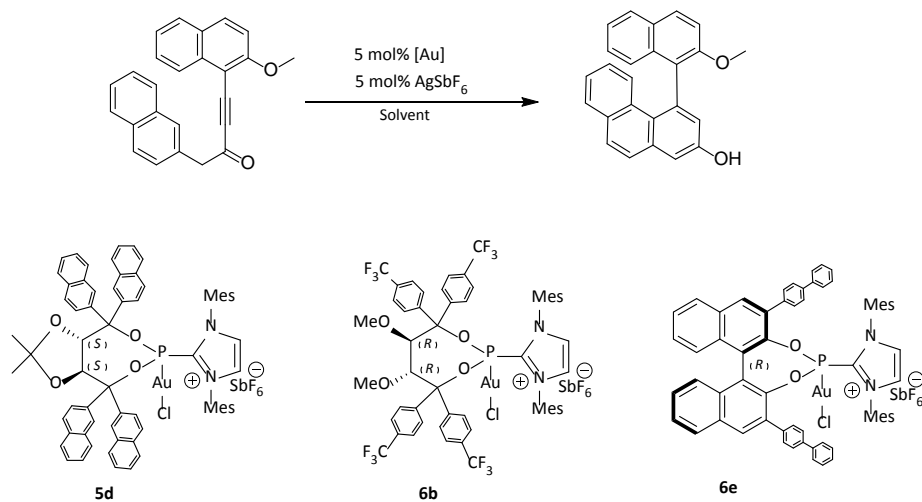

| Entry            | Solvent | [Au]      | T (°C) | yield (%) <sup>[b]</sup> | <i>ee</i> (%) <sup>[c]</sup> |
|------------------|---------|-----------|--------|--------------------------|------------------------------|
| 1                | DCE     | <b>5d</b> | 40     | 90                       | -11                          |
| 2                | DCE     | <b>6b</b> | 40     | 87                       | 19                           |
| 3                | DCE     | <b>6e</b> | 40     | 75                       | 11                           |
| 4 <sup>[d]</sup> | DCM     | <b>5d</b> | -20    | 85                       | -20                          |
| 5 <sup>[d]</sup> | DCM     | <b>6b</b> | -20    | 80                       | 41                           |
| 6 <sup>[d]</sup> | DCM     | <b>6e</b> | -20    | 67                       | 24                           |

[a] Reaction conditions: substrate (0.025 mmol) in solvent (0.5 mL), [Au]-catalyst (5 mol%), AgSbF<sub>6</sub> (5 mol%), stirred for 6 h. [b] Yield of isolated product. [c] The enantiomeric excesses were determined by chiral HPLC. [d] stirred for 12 h.

**Table S2: Evaluation of Different Catalysts<sup>[a]</sup>**

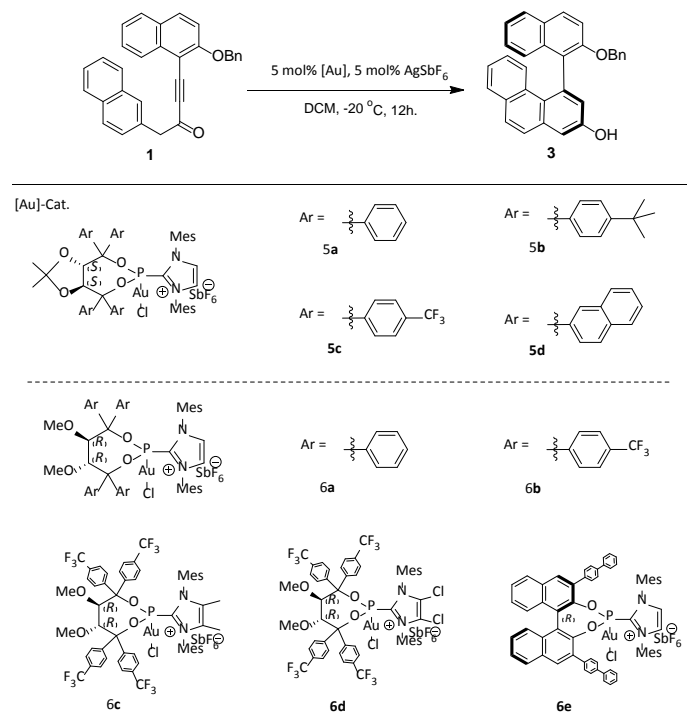

| Entry    | [Au]-Cat. | Solvent    | Conv.[%] <sup>[b]</sup> | Yield [%] <sup>[c]</sup> | ee [%] <sup>[c]</sup> |
|----------|-----------|------------|-------------------------|--------------------------|-----------------------|
| 1        | none      | DCM        | 0                       | 0                        | -                     |
| 2        | <b>5a</b> | DCM        | > 95                    | 90                       | -2                    |
| 3        | <b>5b</b> | DCM        | > 95                    | 93                       | 0                     |
| 4        | <b>5c</b> | DCM        | > 95                    | 91                       | -30                   |
| 5        | <b>5d</b> | DCM        | > 95                    | 87                       | -3                    |
| 6        | <b>6a</b> | DCM        | > 95                    | 85                       | 38                    |
| 7        | <b>6b</b> | DCM        | > 95                    | 83                       | 50                    |
| <b>8</b> | <b>6c</b> | <b>DCM</b> | <b>&gt; 95</b>          | <b>90</b>                | <b>95</b>             |
| 9        | <b>6d</b> | DCM        | > 95                    | 86                       | 88                    |
| 10       | <b>6e</b> | DCM        | > 95                    | 90                       | 0                     |

[a] Reaction conditions: substrate (0.025 mmol) in DCM (0.5 mL), [Au]-catalyst (5.0 mol%), AgSbF<sub>6</sub> (5.0 mol%), stirred at -20 °C for 12 h. [b] The conversions were determined by <sup>1</sup>H-NMR spectroscopy of the crude reaction mixture. [c] Yield of isolated product. [d] The enantiomeric excesses were determined by HPLC with a chiral column.

**Table S3: Evaluation of Different Protecting Groups<sup>[a]</sup>**

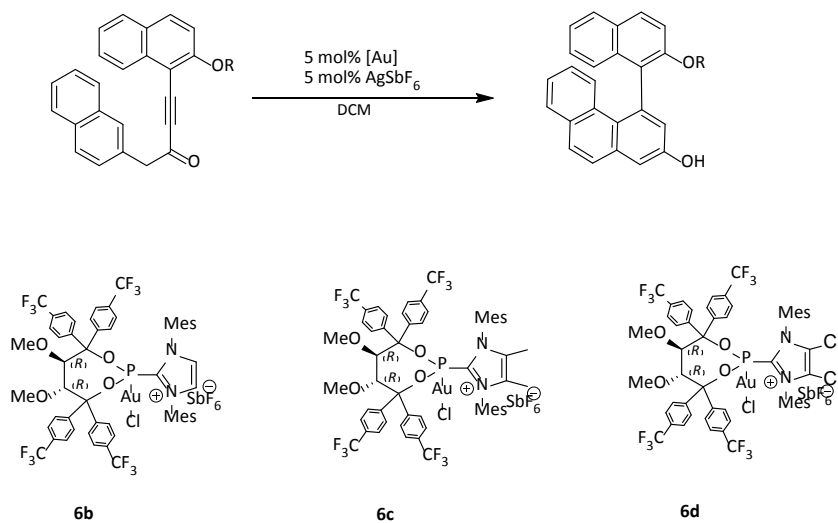

| Entry                  | R                       | [Au]      | T (°C)     | Conv. (%) <sup>[b]</sup> | Yield (%) <sup>[c]</sup> | ee (%) <sup>[d]</sup> |
|------------------------|-------------------------|-----------|------------|--------------------------|--------------------------|-----------------------|
| 1                      | CH <sub>3</sub>         | <b>6b</b> | -20        | >95                      | 90                       | 41                    |
| 2                      | benzyl                  | <b>6b</b> | -20        | >95                      | 83                       | 50                    |
| 3                      | 2-naphthylmethyl        | <b>6b</b> | -20        | >95                      | 92                       | 57                    |
| 4                      | benzyl                  | <b>6c</b> | -20        | >95                      | 90                       | 95                    |
| <b>5<sup>[e]</sup></b> | <b>2-naphthylmethyl</b> | <b>6c</b> | <b>-30</b> | <b>&gt;95</b>            | <b>90</b>                | <b>97</b>             |
| <b>6<sup>[e]</sup></b> | 2-naphthylmethyl        | <b>6d</b> | -30        | >95                      | 87                       | 95                    |

[a] Reaction conditions: substrate (0.025 mmol) in DCM (0.5 mL), [Au]-catalyst (5.0 mol%), AgSbF<sub>6</sub> (5.0 mol%), stirred for 12 h. [b] The conversions were determined by <sup>1</sup>H-NMR spectroscopy of the crude reaction mixture. [c] Yield of isolated product. [d] The enantiomeric excesses were determined by HPLC with a chiral column. [e] stirred for 18 h.

### 3. General procedure for the synthesis of alkynesones

General procedure for the synthesis of **2a-b** and **2e-t** [2]

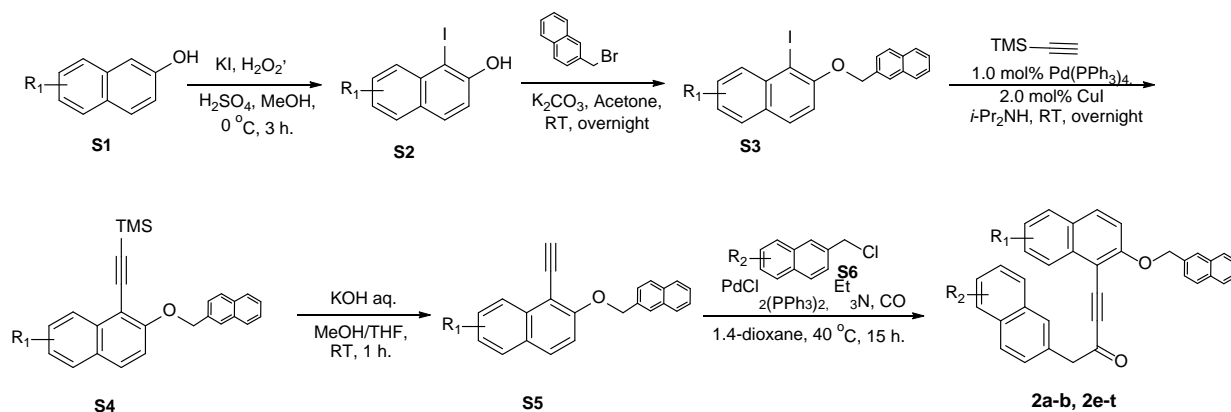

2-naphthol **S1** (20.6 mmol, 1.00 eq.) and KI (20.6 mmol, 1.00 eq.) were added to a solution of conc. H<sub>2</sub>SO<sub>4</sub> (1.60 mL, 30.9 mmol, 1.50 eq.) in MeOH (100 mL) at 0 °C. After this, 35% aq. H<sub>2</sub>O<sub>2</sub> solution (41.2 mmol, 2.00 eq.) was added and the mixture stirred for 80 min. After this, the reaction mixture was poured into CH<sub>2</sub>Cl<sub>2</sub> (100 mL) and subsequently washed with 0.1 M NaHSO<sub>3</sub> solution (100 mL) and H<sub>2</sub>O (100 mL). The organic phase was dried over MgSO<sub>4</sub> and the solvent evaporated. Finally, the crude product was submitted to flash column chromatography (SiO<sub>2</sub>, hexanes/EtOAc 50:1) to yield the pure products **S2**.

K<sub>2</sub>CO<sub>3</sub> (3.11 g, 22.5 mmol, 1.50 eq.) was added to a solution of 1-iodonaphthalenes **S2** (15 mmol, 1.00 eq.) and 2-naphthylmethyl bromide (22.5 mmol, 1.50 eq.) in acetone (100 mL). The resulting mixture was stirred at room temperature for 13 h. After filtration, the solvents were concentrated and the residue was purified by a silica gel column chromatography (hexane/acetone = 50:1, v/v) to give products **S3**.

Pd(PPh<sub>3</sub>)<sub>4</sub> (0.13 mmol, 0.01 eq.) was added to a solution of **S3** (13.3 mmol, 1.00 eq.) and trimethylsilyl acetylene (19.9 mmol, 1.50 eq.) in *i*-Pr<sub>2</sub>NH (80 mL). The mixture thus obtained

was stirred for 5 min, and finally CuI (0.26 mmol, 0.02 eq.) was added. The resulting mixture was stirred at room temperature for 15 h and subsequently concentrated to afford the corresponding crude **S4**, which was used for the next step without further purification.

A solution of KOH (ca. 0.1 g) in distilled water (5 mL) was added to a solution of crude **S4** in MeOH (60 mL) and THF (15 mL). The mixture obtained was stirred at RT for 30 min. and subsequently diluted with water (30 mL) and extracted with ether. After separation of the phases, the organic one was washed with brine, dried over Na<sub>2</sub>SO<sub>4</sub>, and concentrated. The residue obtained was purified by silica gel column chromatography (hexane:acetone = 30:1, v/v) to afford the desired 1-ethynyl-2-(naphthalen-2-ylmethoxy)naphthalene **S5** as a yellow solid.

Finally, PdCl<sub>2</sub>(PPh<sub>3</sub>)<sub>2</sub> (0.13 mmol, 0.05 eq.), the desired 2-(chloromethyl)naphthalene **S6** (2.6 mmol, 1.00 eq.), **S5** (2.9 mmol, 1.10 eq.) and Et<sub>3</sub>N (3.9 mmol, 1.50 eq.), were suspended in 1,4-dioxane (10 mL) under a N<sub>2</sub> atmosphere. The flask was purged with CO (1 atm) three times, and heated to 40 °C for 15 h. After cooling the reaction mixture to room temperature, the remaining CO was vented, the reaction was quenched with water and finally extracted with CH<sub>2</sub>Cl<sub>2</sub>. The organic layer was washed with brine, dried over Na<sub>2</sub>SO<sub>4</sub>, and concentrated in vacuo affording a residue that was purified by silica gel column chromatography (CH<sub>2</sub>Cl<sub>2</sub>/MeOH = 150:1, v/v) to give the alkyne products **2a-b** and **2e-t**.



## Characterization data of **2a-b** and **2e-t**.

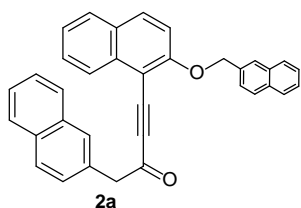

Yellow solid;  $^1\text{H NMR}$  (400 MHz,  $\text{CDCl}_3$ ):  $\delta$  (ppm) 7.96 (s, 1H), 7.90 – 7.85 (m, 2H), 7.85 – 7.74 (m, 7H), 7.69 (d,  $J = 8.1$  Hz, 1H), 7.66 – 7.61 (m, 1H), 7.55 (dd,  $J = 8.5, 1.7$  Hz, 1H), 7.50 – 7.45 (m, 5H), 7.33 – 7.27 (m, 1H), 7.22 (d,  $J = 9.2$  Hz, 1H), 7.11 – 7.07 (m, 1H), 5.44 (s, 2H), 4.16 (s, 2H);  $^{13}\text{C NMR}$  (101 MHz,  $\text{CDCl}_3$ ):  $\delta$  (ppm) 185.4, 161.2, 134.9, 134.0, 133.8, 133.5, 133.4, 133.2, 132.8, 131.4, 129.1, 128.6, 128.6, 128.5, 128.3, 128.2, 128.2, 128.1, 127.9, 127.9, 126.5, 126.3, 126.3, 126.0, 126.0, 125.0, 124.9, 124.7, 114.2, 103.9, 98.0, 89.1, 71.4, 52.5. **IR** (neat) 439, 475, 549, 667, 736, 751, 761, 773, 812, 824, 856, 949, 1019, 1044, 1137, 1149, 1227, 1277, 1650, 2177  $\text{cm}^{-1}$ . **HRMS-ESI** exact mass calcd. for  $\text{C}_{35}\text{H}_{24}\text{O}_2\text{Na}$  ( $[\text{M}+\text{Na}]^+$ ) requires  $m/z$  499.1669, found  $m/z$  499.1656.

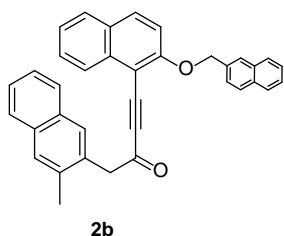

Yellow solid;  $^1\text{H NMR}$  (400 MHz,  $\text{CDCl}_3$ ):  $\delta$  (ppm) 7.99 (s, 1H), 7.96 – 7.90 (m, 1H), 7.90 – 7.83 (m, 3H), 7.80 (dd,  $J = 8.7, 3.0$  Hz, 3H), 7.74 – 7.62 (m, 2H), 7.60 – 7.36 (m, 6H), 7.32 – 7.26 (m, 1H), 7.21 (d,  $J = 9.1$  Hz, 1H), 6.91 (dd,  $J = 8.5, 6.9$  Hz, 1H), 5.42 (s, 2H), 4.20 (s, 2H), 2.54 (s, 3H);  $^{13}\text{C NMR}$  (101 MHz,  $\text{CDCl}_3$ ):  $\delta$  (ppm) 185.7, 161.3, 135.7, 134.9, 134.0, 133.5, 133.5, 133.4, 133.2, 132.5, 131.7, 130.2, 128.7, 128.6, 128.4, 128.2, 128.2, 128.2, 127.8, 127.6, 127.2, 126.5, 126.2, 126.1, 125.9, 125.5, 124.9, 124.8, 124.6, 114.1, 103.9, 97.9, 88.8, 71.3, 50.7, 20.5. **IR** (neat) 421, 439, 449, 560, 570, 675, 761, 775, 805, 888, 1048, 1077, 1122, 1148, 1217, 1229, 1276, 1349, 1375, 1508, 1642, 1739, 2175  $\text{cm}^{-1}$ . **HRMS-ESI** exact mass calcd. for  $\text{C}_{36}\text{H}_{26}\text{O}_2\text{Na}$  ( $[\text{M}+\text{Na}]^+$ ) requires  $m/z$  513.1825, found

m/z 513.1817.

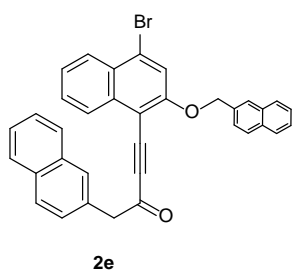

2e

Yellow solid; <sup>1</sup>H NMR (400 MHz, CDCl<sub>3</sub>): δ (ppm) 8.08 (d, *J* = 8.5 Hz, 1H), 7.97 (s, 1H), 7.91 – 7.76 (m, 7H), 7.61 – 7.59 (m, 2H), 7.55 (dd, *J* = 8.5, 1.7 Hz, 1H), 7.51 – 7.43 (m, 5H), 7.40 – 7.36 (m, 1H), 7.09 – 7.05 (m, 1H), 5.41 (s, 2H), 4.13 (s, 2H); <sup>13</sup>C NMR (101 MHz, CDCl<sub>3</sub>): δ (ppm) 185.3, 160.2, 135.2, 133.8, 133.5, 133.4, 133.3, 132.8, 131.2, 129.1, 129.0, 128.7, 128.7, 128.5, 128.3, 128.0, 127.9, 127.9, 127.6, 127.5, 126.6, 126.4, 126.4, 126.2, 126.1, 125.4, 124.7, 118.7, 104.2, 98.5, 88.2, 71.7, 52.5. IR (neat) 413, 445, 617, 679, 776, 801, 812, 822, 834, 902, 1048, 1089, 1227, 1257, 1274, 1325, 1497, 1646 cm<sup>-1</sup>. HRMS-ESI exact mass calcd. for C<sub>35</sub>H<sub>23</sub>BrO<sub>2</sub>Na ([M+Na]<sup>+</sup>) requires m/z 577.0774, found m/z 577.0760.

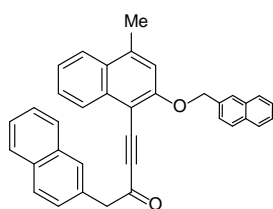

2f

White solid; <sup>1</sup>H NMR (400 MHz, CDCl<sub>3</sub>): δ (ppm) 7.98 (s, 1H), 7.93 – 7.70 (m, 8H), 7.68 (d, *J* = 8.3 Hz, 1H), 7.57 (dd, *J* = 8.5, 1.7 Hz, 1H), 7.50 – 7.44 (m, 5H), 7.50 – 7.44 (m, 5H), 7.35 – 7.31 (m, 1H), 7.11 – 7.07 (m, 2H), 5.43 (s, 2H), 4.15 (s, 2H), 2.64 (s, 3H); <sup>13</sup>C NMR (101 MHz, CDCl<sub>3</sub>): δ (ppm) 185.3, 161.0, 141.5, 135.0, 134.2, 133.8, 133.5, 133.2, 132.8, 131.5, 129.0, 128.6, 128.6, 128.2, 128.1, 128.0, 127.9, 127.9, 126.5, 126.3, 126.2, 126.0, 126.0, 125.6, 124.8, 124.5, 115.3, 102.1, 98.1, 89.9, 52.5, 20.5. IR (neat) 418, 619, 681, 812, 836, 860, 901, 1049, 1095, 1130, 1214, 1234, 1264, 1275, 1340, 1353, 1508, 1641, 2164 cm<sup>-1</sup>. HRMS-ESI exact mass calcd. for C<sub>36</sub>H<sub>26</sub>O<sub>2</sub>Na ([M+Na]<sup>+</sup>) requires m/z 513.1825, found m/z 513.1815.

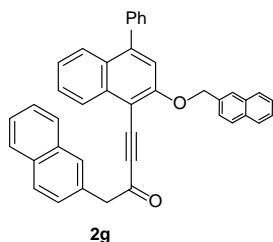

Yellow solid; **<sup>1</sup>H NMR** (400 MHz, CDCl<sub>3</sub>): δ (ppm) 8.04 (s, 1H), 7.95 – 7.93 (m, 1H), 7.91 – 7.81 (m, 6H), 7.79 – 7.72 (m, 2H), 7.61 (dd, *J* = 8.5, 1.8 Hz, 1H), 7.55 – 7.48 (m, 8H), 7.41 (dt, *J* = 7.1, 2.0 Hz, 2H), 7.30 – 7.26 (m, 1H), 7.15 – 7.11 (m, 1H), 5.48 (s, 2H), 4.21 (s, 2H); **<sup>13</sup>C NMR** (101 MHz, CDCl<sub>3</sub>): δ (ppm) 185.3, 160.5, 146.1, 139.7, 135.4, 133.9, 133.8, 133.5, 133.2, 132.8, 131.4, 129.8, 129.0, 128.6, 128.6, 128.2, 128.1, 128.1, 127.9, 127.9, 127.9, 127.1, 126.7, 126.5, 126.3, 126.3, 126.2, 126.0, 125.4, 124.9, 124.9, 115.3, 103.4, 98.4, 89.3, 71.4, 52.5. **IR** (neat) 420, 437, 451, 617, 639, 689, 858, 1026, 1046, 1089, 1229, 1153, 1215, 1342, 1359, 1560, 1575, 1650, 2172 cm<sup>-1</sup>. **HRMS-ESI** exact mass calcd. for C<sub>41</sub>H<sub>28</sub>O<sub>2</sub>Na ([M+Na]<sup>+</sup>) requires *m/z* 575.1982, found *m/z* 575.1966.

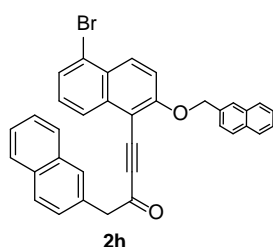

Yellow solid; **<sup>1</sup>H NMR** (400 MHz, CDCl<sub>3</sub>): δ (ppm) 8.21 (d, *J* = 9.4 Hz, 1H), 7.95 (d, *J* = 1.6 Hz, 1H), 7.91 – 7.72 (m, 7H), 7.58 – 7.42 (m, 8H), 7.29 (d, *J* = 9.4 Hz, 1H), 6.81 (dd, *J* = 8.5, 7.4 Hz, 1H), 5.44 (s, 2H), 4.15 (s, 2H); **<sup>13</sup>C NMR** (101 MHz, CDCl<sub>3</sub>): δ (ppm) 185.3, 161.5, 136.2, 133.8, 133.7, 133.4, 133.3, 132.8, 132.6, 131.3, 129.1, 128.9, 128.7, 128.7, 128.5, 128.2, 128.0, 127.9, 127.9, 127.0, 126.6, 126.4, 126.4, 126.1, 126.1, 124.9, 124.6, 123.2, 115.1, 104.3, 98.1, 88.3, 71.3, 52.5. **IR** (neat) 420, 572, 668, 688, 707, 759, 776, 794, 814, 824, 857, 1052, 1086, 1124, 1144, 1233, 1259, 1271, 1650, 2176 cm<sup>-1</sup>. **HRMS-ESI** exact mass calcd. for C<sub>35</sub>H<sub>23</sub>BrO<sub>2</sub>Na ([M+Na]<sup>+</sup>) requires *m/z* 577.0774, found *m/z* 577.0755.

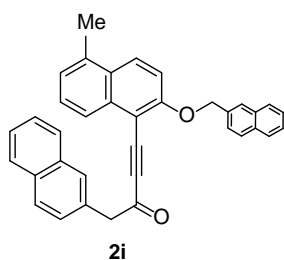

White solid;  $^1\text{H NMR}$  (400 MHz,  $\text{CDCl}_3$ ):  $\delta$  (ppm) 7.97 (dt,  $J = 10.9$ , 1.2 Hz, 2H), 7.91 – 7.68 (m, 7H), 7.55 (dd,  $J = 8.5$ , 1.8 Hz, 2H), 7.52 – 7.40 (m, 5H), 7.22 (dt,  $J = 9.4$ , 1.2 Hz, 1H), 7.12 (dt,  $J = 6.9$ , 1.1 Hz, 1H), 6.99 (dd,  $J = 8.5$ , 7.0 Hz, 1H), 5.43 (s, 2H), 4.16 (s, 2H), 2.58 (s, 3H).  $^{13}\text{C NMR}$  (101 MHz,  $\text{CDCl}_3$ ):  $\delta$  (ppm) 185.4, 160.9, 135.3, 135.0, 134.1, 133.8, 133.5, 133.2, 132.8, 131.4, 129.7, 129.0, 128.6, 128.6, 128.2, 128.1, 128.1, 127.9, 127.9, 127.7, 126.5, 126.3, 126.3, 126.0, 126.0, 125.8, 124.7, 123.4, 113.6, 104.4, 98.0, 89.4, 71.3, 52.6, 19.4. **IR** (neat) 413, 441, 666, 775, 802, 855, 950, 1055, 1093, 1117, 1143, 1171, 1237, 1265, 1497, 1506, 1575, 1588, 1652, 2183  $\text{cm}^{-1}$ . **HRMS-ESI** exact mass calcd. for  $\text{C}_{36}\text{H}_{26}\text{O}_2\text{Na}$  ( $[\text{M}+\text{Na}]^+$ ) requires  $m/z$  513.1825, found  $m/z$  513.1814.

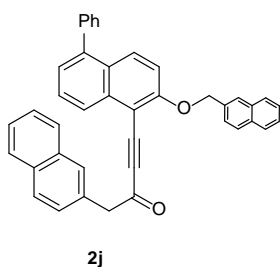

Yellow solid;  $^1\text{H NMR}$  (400 MHz,  $\text{CDCl}_3$ ):  $\delta$  (ppm) 7.94 (d,  $J = 1.6$  Hz, 1H), 7.91 – 7.73 (m, 8H), 7.67 (dt,  $J = 8.5$ , 1.0 Hz, 1H), 7.54 (dd,  $J = 8.5$ , 1.8 Hz, 1H), 7.51 – 7.38 (m, 8H), 7.36 (dd,  $J = 7.8$ , 1.8 Hz, 2H), 7.23 (dd,  $J = 7.1$ , 1.2 Hz, 1H), 7.17 – 7.01 (m, 2H), 5.42 (s, 2H), 4.18 (s, 2H).  $^{13}\text{C NMR}$  (101 MHz,  $\text{CDCl}_3$ ):  $\delta$  (ppm) 185.4, 161.0, 140.9, 140.2, 135.4, 134.0, 133.8, 133.5, 133.2, 132.8, 131.8, 131.4, 130.1, 129.1, 128.7, 128.6, 128.4, 128.2, 128.1, 128.0, 127.9, 127.9, 127.8, 127.6, 126.7, 126.5, 126.4, 126.3, 126.1, 126.0, 126.0, 124.7, 124.6, 113.9, 104.0, 98.1, 89.4, 71.2, 52.6. **IR** (neat) 413, 539, 547, 571, 603, 626, 667, 776, 857, 1018, 1044, 1057, 1086, 1114, 1126, 1136, 1233, 1257, 1275, 1507, 1634, 1645  $\text{cm}^{-1}$ . **HRMS-ESI** exact mass calcd. for  $\text{C}_{41}\text{H}_{28}\text{O}_2\text{Na}$  ( $[\text{M}+\text{Na}]^+$ ) requires  $m/z$  575.1982, found  $m/z$

575.1963.

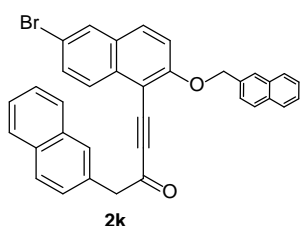

2k

Yellow solid; <sup>1</sup>H NMR (400 MHz, CDCl<sub>3</sub>): δ (ppm) 7.94 (d, *J* = 1.6 Hz, 1H), 7.91 – 7.74 (m, 8H), 7.68 (d, *J* = 9.2 Hz, 1H), 7.56 – 7.42 (m, 6H), 7.36 (d, *J* = 8.9 Hz, 1H), 7.22 (d, *J* = 9.2 Hz, 1H), 7.01 (dd, *J* = 8.9, 2.0 Hz, 1H), 5.41 (s, 2H), 4.14 (s, 2H); <sup>13</sup>C NMR (101 MHz, CDCl<sub>3</sub>): δ (ppm) 185.3, 161.2, 133.8, 133.4, 133.4, 133.2, 132.8, 132.2, 131.4, 131.3, 130.1, 129.4, 129.1, 128.7, 128.7, 128.2, 128.0, 127.9, 127.9, 127.9, 126.7, 126.6, 126.5, 126.4, 126.2, 126.0, 124.7, 118.7, 115.2, 104.2, 98.0, 88.2, 71.4, 52.5. IR (neat) 439, 476, 655, 671, 739, 760, 775, 824, 857, 882, 953, 1038, 1066, 1144, 1144, 1162, 1228, 1272, 1327, 1495, 1580, 1646, 2185 cm<sup>-1</sup>. HRMS-ESI exact mass calcd. for C<sub>35</sub>H<sub>23</sub>BrO<sub>2</sub>Na ([M+Na]<sup>+</sup>) requires *m/z* 577.0774, found *m/z* 577.0757.

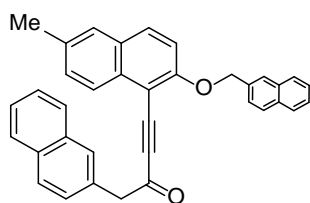

2l

Light yellow solid; <sup>1</sup>H NMR (400 MHz, CDCl<sub>3</sub>): δ (ppm) 7.96 (s, 1H), 7.91 – 7.75 (m, 7H), 7.71 (d, *J* = 9.1 Hz, 1H), 7.61 – 7.51 (m, 2H), 7.50 – 7.45 (m, 6H), 7.17 (d, *J* = 9.1 Hz, 1H), 6.95 (dd, *J* = 8.5, 1.6 Hz, 1H), 5.39 (s, 2H), 4.16 (s, 2H), 2.41 (s, 3H); <sup>13</sup>C NMR (101 MHz, CDCl<sub>3</sub>): δ (ppm) 185.3, 160.6, 134.5, 134.2, 133.8, 133.5, 133.2, 133.0, 132.8, 131.3, 130.5, 129.0, 128.7, 128.6, 128.2, 128.0, 127.9, 127.9, 127.2, 126.5, 126.3, 126.3, 126.0, 126.0, 124.8, 124.8, 114.2, 103.8, 97.9, 89.4, 71.4, 52.5, 21.4. IR (neat) 440, 476, 544, 667, 676, 687, 738, 757, 775, 823, 856, 883, 1035, 1044, 1144, 1229, 1278, 1647, 2180 cm<sup>-1</sup>. HRMS-ESI exact mass calcd. for C<sub>36</sub>H<sub>26</sub>O<sub>2</sub>Na ([M+Na]<sup>+</sup>) requires *m/z* 513.1825, found *m/z* 513.1813.

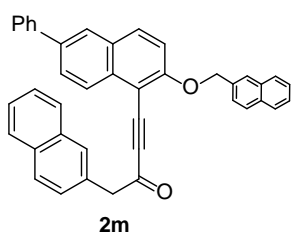

Yellow solid;  $^1\text{H NMR}$  (600 MHz,  $\text{CDCl}_3$ , 323 K):  $\delta$  (ppm) 8.01 – 7.95 (m, 1H), 7.93 – 7.78 (m, 9H), 7.67 – 7.56 (m, 4H), 7.52 – 7.47 (m, 7H), 7.43 – 7.34 (m, 1H), 7.30 (dd,  $J = 8.7, 1.9$  Hz, 1H), 7.28 (s, 2H), 5.47 (s, 2H), 4.18 (s, 2H);  $^{13}\text{C NMR}$  (151 MHz,  $\text{CDCl}_3$ , 323 K):  $\delta$  (ppm) 185.2, 161.3, 140.7, 137.8, 134.2, 134.2, 134.0, 133.6, 133.6, 133.4, 133.0, 131.6, 129.2, 129.0, 129.0, 128.7, 128.7, 128.3, 128.2, 128.1, 128.0, 127.9, 127.9, 127.6, 127.4, 126.5, 126.4, 126.4, 126.2, 126.1, 126.0, 125.6, 124.9, 115.0, 104.3, 98.1, 89.0, 71.8, 52.6. **IR** (neat) 434, 475, 546, 601, 669, 688, 741, 756, 775, 802, 824, 836, 1055, 1145, 1232, 1272, 1287, 1496, 1654, 2181  $\text{cm}^{-1}$ . **HRMS-ESI** exact mass calcd. for  $\text{C}_{41}\text{H}_{28}\text{O}_2\text{Na}$  ( $[\text{M}+\text{Na}]^+$ ) requires  $m/z$  575.1982, found  $m/z$  575.1966.

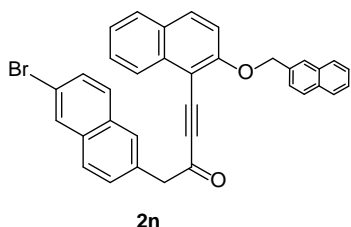

White solid;  $^1\text{H NMR}$  (400 MHz,  $\text{CDCl}_3$ ):  $\delta$  (ppm) 7.93 (d,  $J = 9.5$  Hz, 2H), 7.84 (dd,  $J = 11.1, 6.9$  Hz, 4H), 7.73 (q,  $J = 8.3$  Hz, 3H), 7.65 (d,  $J = 8.4$  Hz, 1H), 7.62 – 7.53 (m, 2H), 7.53 – 7.42 (m, 4H), 7.36 – 7.32 (m, 1H), 7.23 (td,  $J = 7.9, 7.0, 1.3$  Hz, 2H), 5.43 (s, 2H), 4.13 (s, 2H);  $^{13}\text{C NMR}$  (101 MHz,  $\text{CDCl}_3$ ):  $\delta$  (ppm) 184.9, 161.3, 134.9, 134.0, 133.8, 133.6, 133.4, 133.2, 132.1, 131.9, 129.9, 129.7, 129.5, 129.1, 128.9, 128.7, 128.5, 128.4, 128.3, 128.2, 127.9, 127.6, 126.6, 126.4, 126.0, 125.0, 124.9, 124.7, 119.9, 114.1, 103.8, 98.0, 89.3, 71.4, 52.4. **IR** (neat) 440, 475, 550, 674, 742, 768, 803, 826, 855, 882, 1049, 1137, 1147, 1229, 1276, 1506, 1587, 1652, 2178  $\text{cm}^{-1}$ . **HRMS-ESI** exact mass calcd. for  $\text{C}_{35}\text{H}_{23}\text{BrO}_2\text{Na}$  ( $[\text{M}+\text{Na}]^+$ ) requires  $m/z$  577.0774, found  $m/z$  577.0756.

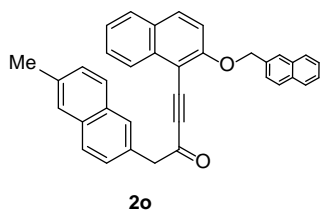

White solid;  $^1\text{H NMR}$  (400 MHz,  $\text{CDCl}_3$ ):  $\delta$  (ppm) 7.94 (s, 1H), 7.90 – 7.73 (m, 6H), 7.74 – 7.63 (m, 4H), 7.59 – 7.51 (m, 2H), 7.51 – 7.46 (m, 2H), 7.43 (dd,  $J = 8.3, 1.8$  Hz, 1H), 7.32 – 7.27 (m, 2H), 7.21 (d,  $J = 9.1$  Hz, 1H), 7.16 – 7.13 (m, 1H), 5.43 (s, 2H), 4.14 (s, 2H), 2.48 (s, 3H);  $^{13}\text{C NMR}$  (101 MHz,  $\text{CDCl}_3$ ):  $\delta$  (ppm) 185.5, 161.2, 135.7, 134.9, 134.1, 133.5, 133.4, 133.2, 133.0, 132.0, 130.4, 128.8, 128.6, 128.6, 128.5, 128.3, 128.2, 128.1, 128.0, 127.9, 127.7, 126.8, 126.5, 126.3, 126.0, 125.0, 124.9, 124.7, 114.2, 104.0, 98.1, 89.0, 71.4, 52.5, 21.8. **IR** (neat) 421, 441, 472, 553, 666, 711, 740, 749, 771, 802, 815, 825, 852, 884, 1048, 1136, 1147, 1219, 1227, 1276, 1506, 1652, 2180  $\text{cm}^{-1}$ . **HRMS-ESI** exact mass calcd. for  $\text{C}_{36}\text{H}_{26}\text{O}_2\text{Na}$  ( $[\text{M}+\text{Na}]^+$ ) requires  $m/z$  513.1825, found  $m/z$  513.1814.

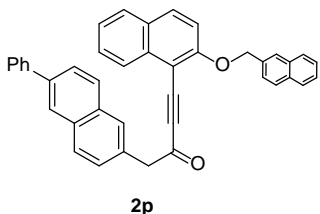

Yellow solid;  $^1\text{H NMR}$  (400 MHz,  $\text{CDCl}_3$ ):  $\delta$  (ppm) 7.98 – 7.94 (m, 2H), 7.91 – 7.77 (m, 7H), 7.73 – 7.66 (m, 5H), 7.54 (dd,  $J = 8.4, 1.8$  Hz, 1H), 7.51 – 7.43 (m, 5H), 7.43 – 7.34 (m, 1H), 7.31 – 7.27 (m, 1H), 7.21 (d,  $J = 9.2$  Hz, 1H), 7.13 – 7.17 (m, 1H), 5.43 (s, 2H), 4.17 (s, 2H).  $^{13}\text{C NMR}$  (101 MHz,  $\text{CDCl}_3$ ):  $\delta$  (ppm) 185.3, 161.2, 141.2, 138.7, 134.9, 134.1, 133.5, 133.4, 133.2, 133.0, 132.9, 131.5, 129.0, 128.9, 128.8, 128.6, 128.5, 128.5, 128.5, 128.3, 128.2, 127.9, 127.5, 127.5, 126.5, 126.3, 126.1, 126.0, 125.8, 125.0, 124.9, 124.7, 114.2, 103.9, 98.1, 89.2, 71.4, 52.6. **IR** (neat) 413, 440, 473, 517, 549, 623, 651, 672, 696, 741, 751, 814, 826, 855, 1048, 1137, 1147, 1229, 1277, 1506, 1652, 2180  $\text{cm}^{-1}$ . **HRMS-ESI** exact mass calcd. for  $\text{C}_{41}\text{H}_{28}\text{O}_2\text{Na}$  ( $[\text{M}+\text{Na}]^+$ ) requires  $m/z$  575.1982, found  $m/z$  575.1975.

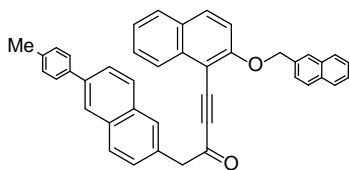

2q

Light yellow solid;  $^1\text{H NMR}$  (400 MHz,  $\text{CDCl}_3$ ):  $\delta$  (ppm) 8.00 – 7.91 (m, 2H), 7.90 – 7.84 (m, 2H), 7.82 (d,  $J = 7.8$  Hz, 5H), 7.78 (s, 1H), 7.74 – 7.64 (m, 3H), 7.61 – 7.56 (m, 2H), 7.54 (dd,  $J = 8.5, 1.8$  Hz, 1H), 7.51 – 7.43 (m, 3H), 7.34 – 7.27 (m, 3H), 7.20 (d,  $J = 8.8$  Hz, 1H), 7.16 – 7.14 (m, 1H), 5.41 (s, 2H), 4.17 (s, 2H), 2.44 (s, 3H);  $^{13}\text{C NMR}$  (101 MHz,  $\text{CDCl}_3$ ):  $\delta$  (ppm) 185.4, 161.2, 138.7, 138.2, 137.3, 134.9, 134.0, 133.5, 133.4, 133.2, 133.1, 132.8, 131.3, 129.7, 128.8, 128.8, 128.6, 128.5, 128.4, 128.3, 128.2, 127.9, 127.3, 126.5, 126.3, 126.0, 126.0, 125.4, 125.0, 124.9, 124.7, 114.1, 103.9, 98.1, 89.2, 71.3, 52.5, 21.3. **IR** (neat) 412, 439, 475, 660, 688, 741, 750, 776, 802, 811, 825, 1048, 1137, 1147, 1226, 1254, 1278, 1497, 1506, 1656, 2181  $\text{cm}^{-1}$ . **HRMS-ESI** exact mass calcd. for  $\text{C}_{42}\text{H}_{30}\text{O}_2\text{Na}$  ( $[\text{M}+\text{Na}]^+$ ) requires  $m/z$  589.2138, found  $m/z$  589.2126.

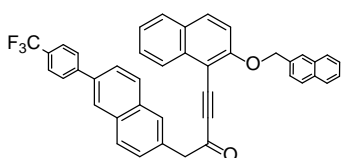

2r

Yellow solid;  $^1\text{H NMR}$  (400 MHz,  $\text{CDCl}_3$ ):  $\delta$  (ppm) 7.96 (d,  $J = 1.8$  Hz, 1H), 7.92 (d,  $J = 1.6$  Hz, 1H), 7.89 – 7.77 (m, 8H), 7.77 – 7.63 (m, 7H), 7.54 – 7.50 (m, 2H), 7.49 – 7.43 (m, 2H), 7.31 – 7.28 (m, 1H), 7.24 – 7.15 (m, 2H), 5.42 (s, 2H), 4.18 (s, 2H);  $^{13}\text{C NMR}$  (101 MHz,  $\text{CDCl}_3$ ):  $\delta$  (ppm) 185.1, 161.2, 144.6, 137.2, 134.9, 134.0, 133.5, 133.4, 133.3, 133.2, 132.9, 132.1, 129.7, 129.4, 129.0, 128.8, 128.8, 128.8, 128.6, 128.5, 128.3, 128.3, 128.2, 127.9, 127.7, 126.5, 126.3, 126.3, 126.0, 125.9, 125.9, 125.8, 125.6, 125.0, 124.9, 124.7, 114.1, 103.9, 98.1, 89.2, 71.3, 52.5.  $^{19}\text{F NMR}$  (376 MHz,  $\text{CDCl}_3$ )  $\delta$  (ppm) -62.4. **IR** (neat) 419, 445, 476, 549, 600, 726, 744, 777, 808, 827, 849, 861, 896, 1012, 1025, 1054,



1072, 1108, 1154, 1227, 1254, 1275, 1331, 1656, 2175.  $\text{cm}^{-1}$  **HRMS-ESI** exact mass calcd. for  $\text{C}_{42}\text{H}_{27}\text{F}_3\text{O}_2\text{Na}$  ( $[\text{M}+\text{Na}]^+$ ) requires  $m/z$  643.1855, found  $m/z$  643.1840.

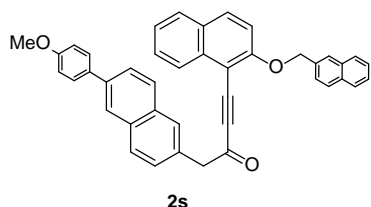

White solid;  $^1\text{H NMR}$  (400 MHz,  $\text{CDCl}_3$ ):  $\delta$  (ppm) 7.98 – 7.90 (m, 2H), 7.90 – 7.77 (m, 7H), 7.69 (td,  $J = 8.8, 8.4, 1.4$  Hz, 3H), 7.65 – 7.58 (m, 2H), 7.53 (dd,  $J = 8.5, 1.7$  Hz, 1H), 7.51 – 7.42 (m, 3H), 7.33 – 7.27 (m, 1H), 7.21 (d,  $J = 9.2$  Hz, 1H), 7.17 – 7.17 (m, 1H), 7.05 – 6.95 (m, 2H), 5.42 (s, 2H), 4.16 (s, 2H), 3.88 (s, 3H);  $^{13}\text{C NMR}$  (101 MHz,  $\text{CDCl}_3$ ):  $\delta$  (ppm) 185.4, 161.2, 159.4, 138.3, 134.9, 134.1, 133.7, 133.5, 133.4, 133.2, 133.1, 132.6, 131.2, 128.8, 128.8, 128.6, 128.5, 128.5, 128.4, 128.3, 128.2, 127.9, 126.5, 126.3, 126.0, 125.9, 125.0, 124.9, 124.7, 114.5, 114.2, 103.9, 98.1, 89.1, 71.3, 55.5, 52.6. **IR** (neat) 411, 420, 439, 475, 741, 752, 812, 825, 1048, 1139, 1148, 1218, 1227, 1278, 1364, 1507, 1654, 1738, 2181, 2359  $\text{cm}^{-1}$ . **HRMS-ESI** exact mass calcd. for  $\text{C}_{42}\text{H}_{30}\text{O}_3\text{Na}$  ( $[\text{M}+\text{Na}]^+$ ) requires  $m/z$  605.2087, found  $m/z$  605.2075.

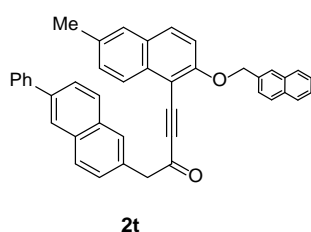

White solid;  $^1\text{H NMR}$  (400 MHz,  $\text{CDCl}_3$ ):  $\delta$  (ppm) 8.00 – 7.91 (m, 2H), 7.91 – 7.78 (m, 6H), 7.78 – 7.63 (m, 4H), 7.54 (dd,  $J = 8.5, 1.3$  Hz, 2H), 7.51 – 7.43 (m, 6H), 7.43 – 7.33 (m, 1H), 7.17 (d,  $J = 9.1$  Hz, 1H), 6.93 (dd,  $J = 8.6, 1.7$  Hz, 1H), 5.40 (s, 2H), 4.16 (s, 2H), 2.37 (s, 3H);  $^{13}\text{C NMR}$  (101 MHz,  $\text{CDCl}_3$ ):  $\delta$  (ppm) 185.4, 160.7, 141.2, 138.8, 134.5, 134.2, 133.5, 133.2, 133.1, 133.0, 133.0, 132.8, 131.5, 130.5, 129.0, 128.9, 128.8, 128.7, 128.6, 128.6, 128.5, 128.2, 127.9, 127.5, 127.5, 127.2, 126.5, 126.3, 126.1, 126.0, 125.8, 124.8,

124.8, 114.2, 103.8, 97.9, 89.5, 71.4, 52.5, 21.5. **IR** (neat) 418, 440, 544, 676, 694, 750, 764, 855, 881, 1041, 1044, 1228, 1279, 1333, 1373, 1497, 1591, 1738, 2182  $\text{cm}^{-1}$ . **HRMS-ESI** exact mass calcd. for  $\text{C}_{42}\text{H}_{31}\text{O}_2\text{Na}$  ( $[\text{M}+\text{H}]^+$ ) requires  $m/z$  567.2319, found  $m/z$  567.2302.

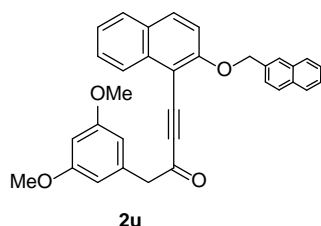

Yellow solid;  **$^1\text{H}$  NMR** (400 MHz,  $\text{CDCl}_3$ ):  $\delta$  (ppm) 8.00 – 7.91 (m, 2H), 7.91 – 7.80 (m, 4H), 7.74 (d,  $J = 8.1$  Hz, 1H), 7.58 (dd,  $J = 8.5, 1.7$  Hz, 1H), 7.55 – 7.43 (m, 3H), 7.41 – 7.37 (m, 1H), 7.24 (s, 1H), 6.55 (d,  $J = 2.2$  Hz, 2H), 6.40 (s, 1H), 5.51 (s, 2H), 3.95 (s, 2H), 3.72 (s, 6H);  **$^{13}\text{C}$  NMR** (101 MHz,  $\text{CDCl}_3$ ):  $\delta$  (ppm) 185.0, 161.2, 161.2, 135.7, 135.0, 134.1, 133.5, 133.4, 133.2, 128.6, 128.6, 128.4, 128.4, 128.2, 127.9, 126.5, 126.3, 126.0, 125.1, 125.0, 124.7, 114.3, 108.1, 104.1, 99.7, 97.9, 88.7, 71.4, 55.4, 52.7. **IR** (neat) 478, 592, 664, 741, 773, 801, 812, 1046, 1064, 1083, 1122, 1148, 1203, 1234, 1274, 1592, 1635. **HRMS-ESI** exact mass calcd. for  $\text{C}_{36}\text{H}_{27}\text{O}_4$  ( $[\text{M}+\text{H}]^+$ ) requires  $m/z$  487.1904, found  $m/z$  487.1892.

## General procedure for the synthesis of **2c** and **2d**<sup>[3]</sup>

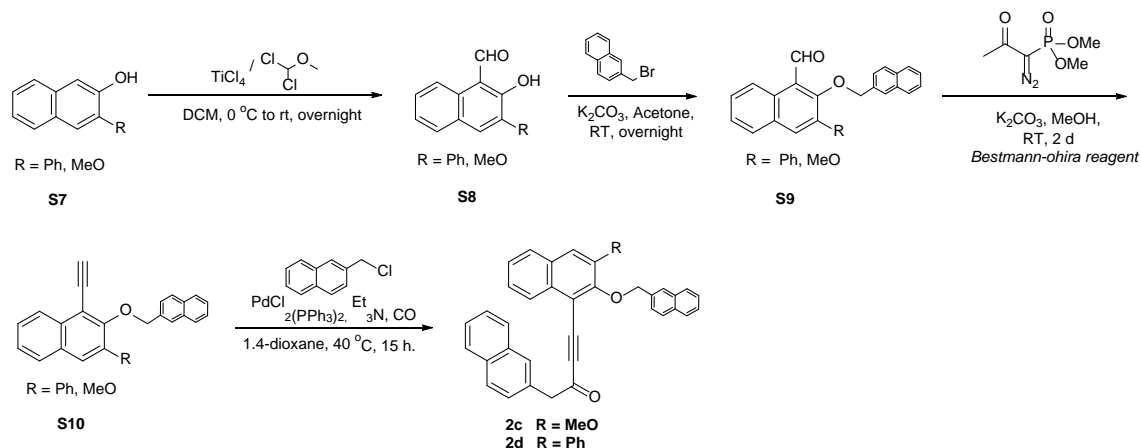

A solution of  $\text{TiCl}_4$  (15.4 mmol, 2.0 eq.) and dichloromethyl methylether (7.7 mmol, 1.0 eq.) in anhydrous  $\text{CH}_2\text{Cl}_2$  (10 mL) was stirred at  $0\text{ }^\circ\text{C}$  for 15 min. After this, a solution of the corresponding substituted naphthol **S7** (7.7 mmol, 1.0 eq.) in  $\text{CH}_2\text{Cl}_2$  (20 mL) was added dropwise, and the reaction allowed to warm to room temperature. The mixture obtained was stirred overnight and subsequently, it was quenched by adding 1 N HCl (10 mL). The aqueous layer was extracted with  $\text{CH}_2\text{Cl}_2$  ( $3 \times 10\text{ mL}$ ), and the combined organic phases dried with  $\text{Na}_2\text{SO}_4$ , and evaporated to afford a residue which was further purified by column chromatography (hexanes/acetone = 10:1, v/v) to yield the corresponding aldehydes **S8**.

After this,  $\text{K}_2\text{CO}_3$  (455 mg, 3.3 mmol, 1.10 eq.) was added to a solution of **S8** (3.0 mmol, 1.00 eq.) and 2-naphtylmethyl bromide (3.3 mmol, 1.10 eq.) in acetone (30 mL) and the resulting mixture stirred at room temperature for 13 h. Filtration of the reaction mixture produced a transparent organic phase that was concentrated in vacuo. The residue thus obtained was purified by a silica gel column chromatography (hexane/acetone = 40:1, v/v) affording **S9**.

To a flame dried, argon purged round bottom flask was added the aldehyde **S9** (0.7 mmol,

1.00 eq.) dissolved in anhydrous methanol (10 mL) and  $K_2CO_3$  (1.4 mmol, 2.00 eq.). Then, Bestmann-Ohira reagent (0.84 mmol, 1.20 eq.) was added slowly via a syringe and the reaction mixture thus obtained was stirred at room temperature for 2 days. After that, the solvent was removed under reduced pressure, water (10 mL) was added and the suspension obtained was extracted with ethyl acetate (15 mL) three times. Concentration of the organic phases was under reduced pressure afforded a residue, which was purified by a silica gel flash column chromatography (hexane/acetone = 20:1, v/v) to obtain the desired product **S10**.

Finally,  $PdCl_2(PPh_3)_2$  (0.13 mmol, 0.05 eq.), 2-(chloromethyl)naphthalene (0.56 mmol, 1.00 eq.), **S10** (0.62 mmol, 1.10 eq.) and  $Et_3N$  (0.84 mmol, 1.50 eq.) were suspended in 1,4-dioxane (5 mL) under a  $N_2$  atmosphere, the flask purged with CO (1 atm) three times, and heated to 40 °C for 15 h. After this the flask was allowed to cool to room temperature and the remaining CO was vented. The reaction was quenched with water and extracted with  $CH_2Cl_2$ . After washing the organic layer with brine, it was dried over  $Na_2SO_4$  and concentrated. The residue was purified by a silica gel column chromatography ( $CH_2Cl_2/MeOH$  = 150:1, v/v) to give the desired alkyne products **2c** and **2d**.

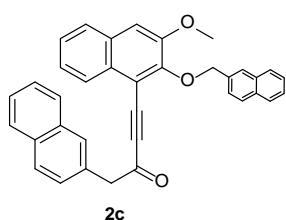

White solid;  $^1H$  NMR (400 MHz,  $CDCl_3$ ):  $\delta$  (ppm) 7.98 (d,  $J$  = 1.6 Hz, 1H), 7.90 – 7.74 (m, 6H), 7.72 (d,  $J$  = 1.7 Hz, 1H), 7.68 (dd,  $J$  = 8.4, 1.7 Hz, 1H), 7.64 (d,  $J$  = 8.1 Hz, 1H), 7.50 – 7.46 (m, 5H), 7.39 – 7.34 (m, 1H), 7.24 (s, 1H), 6.96 – 6.91 (m, 1H), 5.38 (s, 2H), 4.02 (s, 2H), 3.98 (s, 3H).  $^{13}C$  NMR (101 MHz,  $CDCl_3$ ):  $\delta$  (ppm) 185.1, 153.4, 151.8, 134.5, 133.7, 133.4, 133.4, 132.8, 131.0, 130.6, 129.3, 129.0, 128.6, 128.3, 128.3, 127.9, 127.9, 127.8,

127.7, 126.8, 126.6, 126.4, 126.2, 126.2, 126.1, 125.5, 125.2, 111.1, 110.7, 96.7, 88.1, 76.4, 56.0, 52.4. **IR** (neat) 4768, 664, 745, 829, 853, 950, 1001, 1012, 1151, 1165, 1203, 1215, 1227, 1255, 1339, 1366, 1425, 1456, 1650, 2181  $\text{cm}^{-1}$ . **HRMS-ESI** exact mass calcd. for  $\text{C}_{26}\text{H}_{36}\text{O}_3\text{Na}$  ( $[\text{M}+\text{Na}]^+$ ) requires  $m/z$  529.1774, found  $m/z$  529.1761.

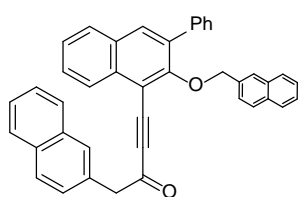

**2d**

White solid;  **$^1\text{H}$  NMR** (400 MHz,  $\text{CDCl}_3$ ):  $\delta$  (ppm) 7.89 (s, 1H), 7.87 – 7.75 (m, 7H), 7.73 (d,  $J = 8.4$  Hz, 1H), 7.67 – 7.58 (m, 3H), 7.54 (d,  $J = 8.4$  Hz, 1H), 7.52 – 7.34 (m, 9H), 7.32 – 7.26 (m, 1H), 7.05 – 7.03 (m, 1H), 4.90 (s, 2H), 4.09 (s, 2H);  **$^{13}\text{C}$  NMR** (101 MHz,  $\text{CDCl}_3$ ):  $\delta$  (ppm) 185.1, 159.9, 137.5, 135.4, 134.0, 133.8, 133.8, 133.7, 133.3, 132.8, 131.1, 130.3, 129.7, 129.1, 128.7, 128.6, 128.3, 128.3, 128.1, 128.1, 128.0, 128.0, 128.0, 127.9, 127.8, 127.8, 126.7, 126.4, 126.3, 126.2, 126.1, 125.2, 110.4, 110.1, 97.1, 88.6, 52.4. **IR** (neat) 420, 478, 517, 667, 696, 751, 828, 991, 1202, 1216, 1227, 1365, 1426, 1457, 1490, 1507, 1649, 2181, 2342, 2359  $\text{cm}^{-1}$ . **HRMS-ESI** exact mass calcd. for  $\text{C}_{41}\text{H}_{28}\text{O}_2\text{Na}$  ( $[\text{M}+\text{Na}]^+$ ) requires  $m/z$  575.1982, found  $m/z$  575.1964.

#### 4. General procedure for gold-catalyzed atroposelective intramolecular hydroarylation of alkynones

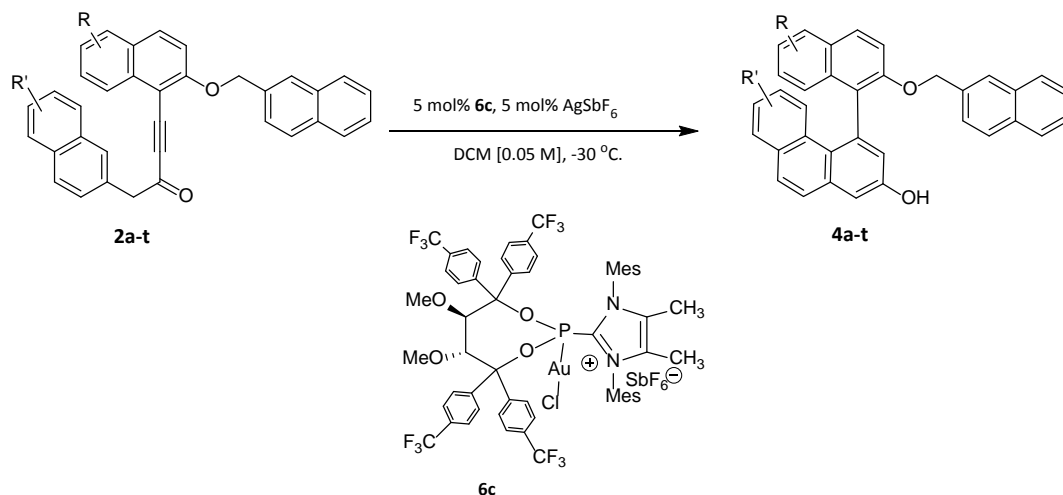

To a dried Schlenk flask equipped with magnetic stirrer substrate **2** (1.0 equiv.) and gold precatalyst **6c** (5 mol%) were added. A septum was fitted to the flask and the content was dried under high vacuum for 30 minutes. Then dichloromethane (0.05M) was added via syringe and the reaction mixture was allowed to stir at room temperature for 2 minutes before transferring it to a pre-cooled isopropanol bath at  $-30\text{ }^\circ\text{C}$ . After this, a solution of  $\text{AgSbF}_6$  (5 mol%, 0.05M solution in dichloromethane) was added through the septum, the septum was exchanged for a greased glass stopper and the reaction mixture was allowed to stir at  $-30\text{ }^\circ\text{C}$  for the indicated time. Once the starting material was consumed, the reaction mixture was filtered through a short pad of silica eluting with dichloromethane, and the solvent was removed in vacuo. The obtained residue was purified by column chromatography on silica gel (*n*-hexanes/acetone =7:1, v/v) to afford the desired product **4a-t**.

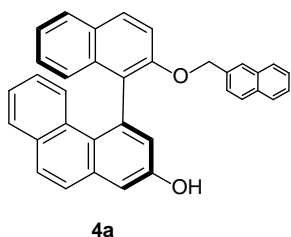

Yellow solid; isolated yield 90%, 97% ee.  $[\alpha]_D^{20} = -64.1$  ( $c = 1.1$ ,  $\text{CHCl}_3$ );  $^1\text{H NMR}$  (400 MHz,  $\text{CDCl}_3$ ):  $\delta$  (ppm) 7.97 (d,  $J = 9.0$  Hz, 1H), 7.89 (d,  $J = 8.2$  Hz, 1H), 7.77-7.67 (m, 4H), 7.53 (q,  $J = 7.4, 6.7$  Hz, 3H), 7.47-7.34 (m, 6H), 7.28 (dd,  $J = 12.7, 3.9$  Hz, 3H), 7.19 (s, 1H), 6.94 (d,  $J = 2.7$  Hz, 1H), 6.88 (t,  $J = 8.1$  Hz, 2H), 5.16 (d,  $J = 12.6$  Hz, 1H), 5.02 (d,  $J = 12.5$  Hz, 1H), 4.94 (s, 1H);  $^{13}\text{C NMR}$  (101MHz,  $\text{CDCl}_3$ ):  $\delta$  (ppm) 153.2, 152.5, 136.4, 135.5, 134.6, 133.4, 133.2, 132.9, 132.3, 131.3, 129.9, 129.5, 128.6, 128.3, 128.0, 127.9, 127.6, 127.3, 126.9, 126.1, 126.0, 125.9, 125.8, 125.7, 125.6, 125.2, 125.0, 124.9, 124.3, 121.6, 116.2, 112.6, 71.3. **IR** (neat) 413, 473, 504, 580, 720, 745, 809, 857, 996, 1070, 1146, 1174, 1220, 1267, 1327, 1600  $\text{cm}^{-1}$ . **HRMS-ESI** exact mass calcd. for  $\text{C}_{35}\text{H}_{24}\text{O}_2\text{Na}$  ( $[\text{M}+\text{Na}]^+$ ) requires  $m/z$  499.1669, found  $m/z$  499.1665.

The enantiomeric excess was determined by HPLC on Chiralcel IC-3 column (hexane : isopropanol = 95 : 5, flowing rate = 1.0 mL/min, 30 °C, UV detection at  $\lambda = 254$  nm),  $t_{R1} = 9.0$  min (minor),  $t_{R2} = 10.1$  min (major).

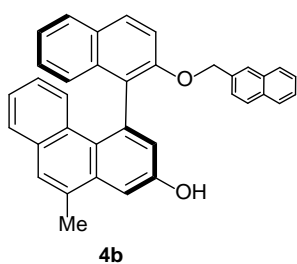

White solid; isolated yield 92%, 96% ee.  $[\alpha]_D^{20} = -59$  ( $c = 1.1$ ,  $\text{CHCl}_3$ );  $^1\text{H NMR}$  (400 MHz,  $\text{CDCl}_3$ ):  $\delta$  (ppm) 7.95 (d,  $J = 8.9$  Hz, 1H), 7.88 (d,  $J = 8.2$  Hz, 1H), 7.80 – 7.63 (m, 2H), 7.63 – 7.30 (m, 11H), 7.26 – 7.19 (m, 2H), 6.95 (d,  $J = 2.9$  Hz, 1H), 6.91 – 6.73 (m, 2H), 5.14 (d,  $J = 12.7$  Hz, 1H), 5.00 (d,  $J = 12.5$  Hz, 1H), 4.94 (s, 1H), 2.75 (s, 3H);  $^{13}\text{C NMR}$  (101MHz,  $\text{CDCl}_3$ ):  $\delta$  (ppm) 153.2, 152.4, 136.7, 135.6, 134.7, 133.3, 133.2, 132.8, 132.1, 131.9, 130.6, 129.9, 129.4, 129.0, 128.5, 128.0, 127.9, 127.9, 127.6, 126.9, 126.0, 125.9,

125.7, 125.7, 125.6, 125.3, 125.3, 125.2, 124.9, 124.3, 121.1, 116.2, 109.0, 71.2, 21.0. **IR** (neat) 418, 450, 473, 519, 578, 729, 746, 809, 855, 885, 951, 1003, 1048, 1183, 1222, 1267, 1328, 1599  $\text{cm}^{-1}$ . **HRMS-ESI** exact mass calcd. for  $\text{C}_{36}\text{H}_{26}\text{O}_2$  ( $[\text{M}+\text{H}]^+$ ) requires  $m/z$  490.1927, found  $m/z$  490.1925.

The enantiomeric excess was determined by HPLC on Chiralcel IA-3 column (hexane : isopropanol = 80 : 20, flowing rate = 1.0 mL/min, 25 °C, UV detection at  $\lambda = 254$  nm),  $t_{\text{R1}} = 5.2$  min (major),  $t_{\text{R2}} = 9.0$  min (minor).

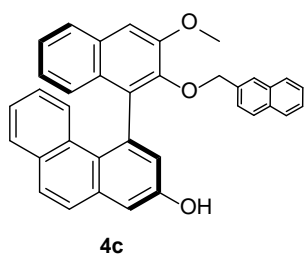

Yellow solid; isolated yield 92%, 86% ee.  $[\alpha]_{\text{D}}^{20} = -104$  ( $c = 1.6$ ,  $\text{CHCl}_3$ ); **<sup>1</sup>H NMR** (400 MHz,  $\text{CDCl}_3$ ):  $\delta$  (ppm) 7.84 (d,  $J = 8.3$  Hz, 1H), 7.76 – 7.60 (m, 4H), 7.50 (q,  $J = 9.2$  Hz, 3H), 7.43 – 7.34 (m, 4H), 7.34 – 7.27 (m, 2H), 7.14 – 7.10 (m, 1H), 7.05 (s, 1H), 6.95 – 6.81 (m, 2H), 6.76 (dd,  $J = 8.4, 1.6$  Hz, 1H), 5.02 (d,  $J = 11.1$  Hz, 1H), 4.75 (s, 1H), 4.72 (d,  $J = 11.1$  Hz, 1H), 4.10 (s, 3H); **<sup>13</sup>C NMR** (101MHz,  $\text{CDCl}_3$ ):  $\delta$  (ppm) 153.0, 153.0, 144.8, 135.8, 135.5, 134.9, 134.7, 133.1, 132.9, 132.3, 131.9, 130.9, 128.7, 128.4, 128.3, 128.1, 127.6, 127.5, 127.1, 126.8, 126.7, 126.1, 125.9, 125.8, 125.8, 125.8, 125.2, 124.8, 124.6, 121.5, 112.8, 107.3, 74.5, 55.9. **IR** (neat) 413, 433, 444, 472, 503, 580, 630, 721, 743, 812, 857, 997, 1045, 1113, 1150, 1174, 1194, 1245, 1423, 1459, 1599  $\text{cm}^{-1}$ . **HRMS-ESI** exact mass calcd. for  $\text{C}_{36}\text{H}_{26}\text{O}_3$  ( $[\text{M}+\text{H}]^+$ ) requires  $m/z$  506.1876, found  $m/z$  499.1872.

The enantiomeric excess was determined by HPLC on Chiralcel IA-3 column (hexane : isopropanol = 70 : 30, flowing rate = 1.0 mL/min, 25 °C, UV detection at  $\lambda = 254$  nm),  $t_{\text{R1}} = 4.1$  min (minor),  $t_{\text{R2}} = 13.1$  min (major).



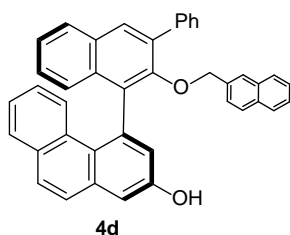

White solid; isolated yield 87%, 97% ee.  $[\alpha]_{\text{D}}^{20} = -195$  ( $c = 1.2$ ,  $\text{CHCl}_3$ );  $^1\text{H NMR}$  (400 MHz,  $\text{CDCl}_3$ ):  $\delta$  (ppm) 8.06 (s, 1H), 7.97 (d,  $J = 8.3$  Hz, 1H), 7.84 – 7.53 (m, 7H), 7.51 – 7.26 (m, 12H), 7.02 (t,  $J = 2.1$  Hz, 1H), 6.96 (dd,  $J = 8.8, 7.0$  Hz, 1H), 6.62 (s, 1H), 6.35 (dd,  $J = 8.5, 1.9$  Hz, 1H), 4.90 (s, 1H), 4.31 (d,  $J = 10.5$  Hz, 1H), 4.22 (d,  $J = 10.5$  Hz, 1H);  $^{13}\text{C NMR}$  (101MHz,  $\text{CDCl}_3$ ):  $\delta$  (ppm) 153.1, 151.1, 138.9, 136.3, 136.0, 135.6, 134.2, 134.1, 133.0, 132.8, 132.8, 132.4, 131.4, 131.1, 130.4, 129.7, 128.8, 128.5, 128.5, 128.2, 128.0, 127.6, 127.5, 127.5, 127.2, 127.2, 126.8, 126.1, 126.1, 125.9, 125.8, 125.7, 125.7, 125.3, 124.9, 121.7, 112.8, 74.4. **IR** (neat) 410, 434, 472, 504, 556, 580, 634, 699, 718, 746, 812, 855, 893, 994, 1149, 1189, 1255, 1560  $\text{cm}^{-1}$ . **HRMS-ESI** exact mass calcd. for  $\text{C}_{41}\text{H}_{28}\text{O}_2\text{Na}$  ( $[\text{M}+\text{Na}]^+$ ) requires  $m/z$  575.1982, found  $m/z$  575.1982.

The enantiomeric excess was determined by HPLC on Chiralcel IC-3 column (hexane : isopropanol = 98 : 2, flowing rate = 1.0 mL/min, 25 °C, UV detection at  $\lambda = 254$  nm),  $t_{\text{R}1} = 6.6$  min (minor),  $t_{\text{R}2} = 8.7$  min (major).

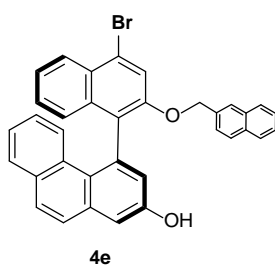

White solid; isolated yield 90%, 97% ee.  $[\alpha]_{\text{D}}^{20} = -88$  ( $c = 1.7$ ,  $\text{CHCl}_3$ );  $^1\text{H NMR}$  (400 MHz,  $\text{CDCl}_3$ ):  $\delta$  (ppm) 8.33 – 8.21 (m, 1H), 7.82 (s, 1H), 7.79 – 7.65 (m, 4H), 7.61 – 7.43 (m, 6H), 7.40 (dt,  $J = 6.5, 3.5$  Hz, 2H), 7.36 – 7.27 (m, 3H), 7.15 (s, 1H), 6.98 – 6.86 (m, 2H), 6.82 (d,  $J = 8.5$  Hz, 1H), 5.14 (d,  $J = 12.3$  Hz, 1H), 5.00 (d,  $J = 12.2$  Hz, 1H), 4.85 (s, 1H);  $^{13}\text{C NMR}$  (101MHz,  $\text{CDCl}_3$ ):  $\delta$  (ppm) 153.1, 152.2, 135.5, 135.5, 134.0, 134.0, 133.1, 132.9, 132.3, 131.1, 128.9, 128.7, 128.5, 128.5, 128.1, 128.0, 127.7, 127.7, 127.3, 127.2, 126.3, 126.1, 126.0, 125.9, 125.8, 125.4, 125.4, 124.9, 124.8, 123.4, 121.6, 120.5, 112.9, 71.6. **IR**

(neat) 473, 506, 580, 719, 744, 813, 855, 912, 995, 1158, 1174, 1219, 1261, 1312, 1372, 1579, 1600, 1739  $\text{cm}^{-1}$ . **HRMS-ESI** exact mass calcd. for  $\text{C}_{35}\text{H}_{23}\text{BrO}_2$  ( $[\text{M}+\text{H}]^+$ ) requires  $m/z$  554.0876, found  $m/z$  554.0870.

The enantiomeric excess was determined by HPLC on Chiralcel IA-3 column (hexane : isopropanol = 80 : 20, flowing rate = 1.0 mL/min, 25 °C, UV detection at  $\lambda = 254$  nm),  $t_{\text{R1}} = 4.5$  min (minor),  $t_{\text{R2}} = 14.4$  min (major).

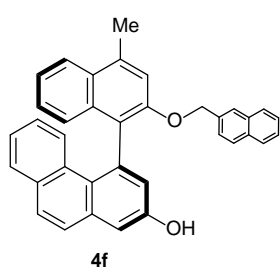

White solid; isolated yield 90%, 93% ee.  $[\alpha]_{\text{D}}^{20} = -105$  ( $c = 0.8$ ,  $\text{CHCl}_3$ );  **$^1\text{H NMR}$**  (400 MHz,  $\text{CDCl}_3$ ):  $\delta$  (ppm) 8.05 (d,  $J = 8.5$  Hz, 1H), 7.76 (dd,  $J = 7.7, 1.5$  Hz, 1H), 7.67 (dt,  $J = 25.5, 8.6$  Hz, 4H), 7.57 – 7.44 (m, 3H), 7.44 – 7.35 (m, 3H), 7.35 – 7.25 (m, 4H), 7.16 (s, 1H), 6.94 – 6.80 (m, 3H), 5.14 (d,  $J = 12.4$  Hz, 1H), 4.99 (d,  $J = 12.4$  Hz, 1H), 4.89 (s, 1H), 2.83 (s, 3H);  **$^{13}\text{C NMR}$**  (101MHz,  $\text{CDCl}_3$ ):  $\delta$  (ppm) 153.1, 152.0, 136.6, 136.3, 135.5, 134.7, 133.5, 133.2, 132.9, 132.3, 131.4, 129.2, 128.6, 128.2, 128.0, 127.9, 127.6, 127.3, 126.9, 126.7, 126.4, 126.1, 126.0, 125.9, 125.6, 125.2, 125.1, 125.0, 124.3, 124.2, 121.9, 117.3, 112.5, 71.4, 20.2. **IR** (neat) 412, 422, 474, 510, 720, 746, 812, 857, 996, 1123, 1175, 1200, 1217, 1228, 1337, 1365, 1597, 1739  $\text{cm}^{-1}$ . **HRMS-ESI** exact mass calcd. for  $\text{C}_{36}\text{H}_{26}\text{O}_2$  ( $[\text{M}+\text{H}]^+$ ) requires  $m/z$  490.1927, found  $m/z$  490.1926.

The enantiomeric excess was determined by HPLC on Chiralcel IA-3 column (hexane : isopropanol = 80 : 20, flowing rate = 1.0 mL/min, 25 °C, UV detection at  $\lambda = 254$  nm),  $t_{\text{R1}} = 6.5$  min (major),  $t_{\text{R2}} = 12.5$  min (minor).

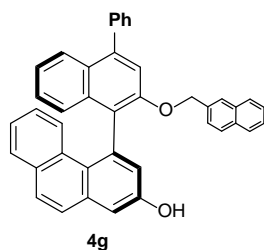

White solid; isolated yield 93%, 96% ee.  $[\alpha]_{\text{D}}^{20} = -97$  ( $c = 1.7$ ,  $\text{CHCl}_3$ );

$^1\text{H NMR}$  (400 MHz,  $\text{CDCl}_3$ ):  $\delta$  (ppm) 7.95 (d,  $J = 8.3$  Hz, 1H), 7.82 – 7.66 (m, 5H), 7.65 – 7.47 (m, 8H), 7.45 (s, 1H), 7.43 – 7.35 (m, 2H), 7.35 – 7.27 (m, 4H), 7.15 (s, 1H), 7.00 (d,  $J = 2.7$  Hz, 1H), 6.97 – 6.88

(m, 1H), 6.83 (dd,  $J = 8.4, 1.6$  Hz, 1H), 5.17 (d,  $J = 12.2$  Hz, 1H), 5.02 (d,  $J = 12.3$  Hz, 1H), 4.86 (s, 1H);  $^{13}\text{C NMR}$  (101MHz,  $\text{CDCl}_3$ ):  $\delta$  (ppm) 153.2, 151.9, 142.0, 140.7, 136.4, 135.5, 134.5, 133.8, 133.2, 132.9, 132.3, 131.4, 130.4, 128.7, 128.6, 128.3, 128.2, 128.0, 127.9, 127.7, 127.6, 127.3, 126.9, 126.3, 126.2, 126.0, 125.9, 125.6, 125.3, 125.1, 125.1, 124.4, 121.8, 117.3, 112.6, 71.4. **IR** (neat) 403, 429, 443, 473, 582, 702, 721, 745, 811, 857, 996, 1149, 1174, 1197, 1335, 1600  $\text{cm}^{-1}$ . **HRMS-ESI** exact mass calcd. for  $\text{C}_{41}\text{H}_{28}\text{O}_2$  ( $[\text{M}+\text{H}]^+$ ) requires  $m/z$  552.2084, found  $m/z$  552.2084.

The enantiomeric excess was determined by HPLC on Chiralcel IA-3 column (hexane : isopropanol = 80 : 20, flowing rate = 1.0 mL/min, 25 °C, UV detection at  $\lambda = 254$  nm),  $t_{\text{R}1} = 5.3$  min (major),  $t_{\text{R}2} = 8.6$  min (minor).

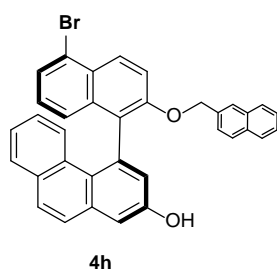

White solid; isolated yield 87%, 95% ee.  $[\alpha]_{\text{D}}^{20} = -131$  ( $c = 1.0$ ,

$\text{CHCl}_3$ );  $^1\text{H NMR}$  (400 MHz,  $\text{CDCl}_3$ ):  $\delta$  (ppm)  $\delta$  8.39 (d,  $J = 9.4$  Hz, 1H), 7.81 – 7.60 (m, 5H), 7.60 – 7.43 (m, 4H), 7.43 – 7.34 (m, 3H), 7.34 – 7.27 (m, 2H), 7.20 (s, 1H), 7.06 (dd,  $J = 8.5, 7.4$  Hz, 1H), 6.92

– 6.85 (m, 3H), 5.19 (d,  $J = 12.6$  Hz, 1H), 5.06 (d,  $J = 12.6$  Hz, 1H), 4.93 (s, 1H);  $^{13}\text{C NMR}$  (101MHz,  $\text{CDCl}_3$ ):  $\delta$  (ppm) 153.2, 153.1, 135.9, 135.5, 134.6, 134.3, 133.1, 132.9, 132.3, 131.2, 128.9, 128.8, 128.7, 128.4, 128.4, 128.2, 128.0, 127.7, 127.3, 127.2, 126.3, 126.1, 126.0, 125.9, 125.8, 125.4, 124.8, 124.8, 123.0, 121.6, 117.0, 112.8, 71.2. **IR** (neat) 408, 474,

580, 687, 723, 744, 803, 856, 996, 1043, 1118, 1175, 1198, 1228, 1262, 1600, 1611  $\text{cm}^{-1}$ .

**HRMS-ESI** exact mass calcd. for  $\text{C}_{35}\text{H}_{23}\text{BrO}_2$  ( $[\text{M}+\text{H}]^+$ ) requires  $m/z$  554.0876, found  $m/z$  554.0872.

The enantiomeric excess was determined by HPLC on Chiralcel IC-3 column (hexane : isopropanol = 98 : 2, flowing rate = 1.0 mL/min, 30 °C, UV detection at  $\lambda = 254$  nm),  $t_{\text{R1}} = 15.4$  min (minor),  $t_{\text{R2}} = 17.6$  min (major).

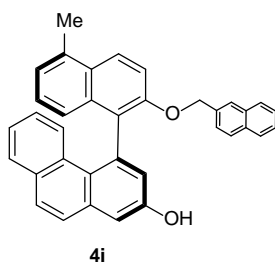

White solid; isolated yield 92%, 92% ee.  $[\alpha]_{\text{D}}^{20} = -125$  ( $c = 2.2$ ,  $\text{CHCl}_3$ );  $^1\text{H NMR}$  (400 MHz,  $\text{CDCl}_3$ ):  $\delta$  (ppm) 8.12 (d,  $J = 9.3$  Hz, 1H), 7.77 (dd,  $J = 7.9, 1.5$  Hz, 1H), 7.73 – 7.66 (m, 2H), 7.61 (d,  $J = 8.8$  Hz, 1H), 7.57 – 7.43 (m, 4H), 7.43 – 7.36 (m, 2H), 7.30 (td,  $J = 8.1, 3.6$  Hz, 2H), 7.23 – 7.06 (m, 4H), 6.95 – 6.77 (m, 3H), 5.16 (d,  $J = 12.4$  Hz, 1H), 5.01 (d,  $J = 12.4$  Hz, 1H), 4.95 (s, 1H), 2.77 (s, 3H);  $^{13}\text{C NMR}$  (101MHz,  $\text{CDCl}_3$ ):  $\delta$  (ppm) 153.2, 152.3, 136.7, 135.4, 134.6, 134.4, 133.6, 133.2, 132.9, 132.3, 131.4, 129.1, 128.6, 128.2, 128.0, 127.9, 127.7, 127.3, 126.7, 126.1, 126.0, 125.9, 125.7, 125.6, 125.3, 125.2, 125.0, 124.9, 124.3, 121.7, 115.6, 112.5, 71.3, 19.9. **IR** (neat) 422, 433, 474, 504, 518, 527, 745, 806, 857, 1178, 1217, 1228, 1365, 1452, 1598, 1739  $\text{cm}^{-1}$ . **HRMS-ESI** exact mass calcd. for  $\text{C}_{36}\text{H}_{26}\text{O}_2$  ( $[\text{M}+\text{H}]^+$ ) requires  $m/z$  490.1927, found  $m/z$  490.1926.

The enantiomeric excess was determined by HPLC on Chiralcel IC-3 column (hexane : isopropanol = 97 : 3, flowing rate = 1.0 mL/min, 30 °C, UV detection at  $\lambda = 254$  nm),  $t_{\text{R1}} = 16.1$  min (minor),  $t_{\text{R2}} = 24.8$  min (major).

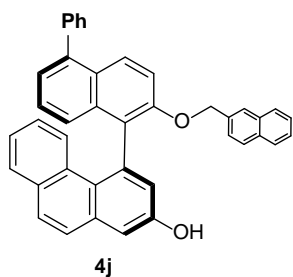

Yellow solid; isolated yield 90%, 90% ee.  $[\alpha]_D^{20} = -118$  ( $c = 1.0$ ,  $\text{CHCl}_3$ );  $^1\text{H NMR}$  (400 MHz,  $\text{CDCl}_3$ ):  $\delta$  (ppm) 8.02 (d,  $J = 9.3$  Hz, 1H), 7.79 (dd,  $J = 7.9, 1.3$  Hz, 1H), 7.76 – 7.67 (m, 2H), 7.67 – 7.42 (m, 10H), 7.38 (dd,  $J = 9.5, 5.8$  Hz, 3H), 7.35 – 7.27 (m, 3H), 7.23 (t,  $J = 2.0$  Hz, 1H), 7.17 (s, 1H), 7.01 – 6.89 (m, 2H), 6.85 (dd,  $J = 8.4, 1.6$  Hz, 1H), 5.15 (d,  $J = 12.6$  Hz, 1H), 5.01 (d,  $J = 12.6$  Hz, 1H), 4.93 (s, 1H);  $^{13}\text{C NMR}$  (101MHz,  $\text{CDCl}_3$ ):  $\delta$  (ppm) 153.2, 152.3, 141.1, 140.4, 136.6, 135.5, 134.6, 133.8, 133.2, 132.9, 132.3, 131.4, 130.3, 128.7, 128.6, 128.4, 128.3, 128.0, 128.0, 128.0, 127.8, 127.7, 127.4, 127.3, 126.5, 126.2, 126.0, 125.9, 125.9, 125.6, 125.5, 125.4, 125.3, 124.9, 121.8, 115.8, 112.6, 71.2. **IR** (neat) 422, 434, 474, 504, 528, 702, 745, 808, 856, 1174, 1217, 1227, 1365, 1452, 1600, 1739. **HRMS-ESI** exact mass calcd. for  $\text{C}_{41}\text{H}_{28}\text{O}_2$  ( $[\text{M}+\text{H}]^+$ ) requires  $m/z$  552.2084, found  $m/z$  552.2082.

The enantiomeric excess was determined by HPLC on Chiralcel IC-3 column (hexane : isopropanol = 98 : 2, flowing rate = 1.0 mL/min, 30 °C, UV detection at  $\lambda = 254$  nm),  $t_{R1} = 18.6$  min (major),  $t_{R2} = 21.8$  min (minor).

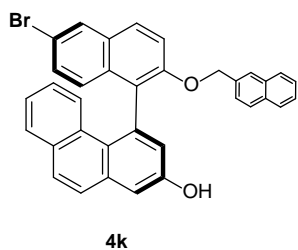

White solid; isolated yield 87%, 97% ee.  $[\alpha]_D^{20} = -53.8$  ( $c = 1.0$ ,  $\text{CHCl}_3$ );  $^1\text{H NMR}$  (400 MHz,  $\text{CDCl}_3$ ):  $\delta$  (ppm) 7.85 (d,  $J = 9.0$  Hz, 1H), 7.78 (d,  $J = 7.8$  Hz, 1H), 7.74 – 7.66 (m, 2H), 7.62 (d,  $J = 8.8$  Hz, 1H), 7.56 – 7.43 (m, 4H), 7.40 (dd,  $J = 6.3, 3.2$  Hz, 2H), 7.30 (d,  $J = 13.0$  Hz, 3H), 7.24 – 7.12 (m, 2H), 6.94 – 6.78 (m, 3H), 5.15 (d,  $J = 12.5$  Hz, 1H), 5.06 (s, 1H), 5.01 (d,  $J = 12.5$  Hz, 1H);  $^{13}\text{C NMR}$  (101MHz,  $\text{CDCl}_3$ ):  $\delta$  (ppm) 153.2, 152.7, 135.6,

135.5, 134.3, 133.1, 132.9, 132.3, 131.9, 131.1, 130.8, 130.2, 130.0, 128.8, 128.7, 128.6, 128.4, 128.0, 127.7, 127.5, 127.3, 126.2, 126.1, 126.0, 125.9, 125.3, 124.9, 124.7, 121.6, 118.2, 117.1, 112.8, 71.3. **IR** (neat) 418, 428, 444, 473, 498, 576, 718, 744, 812, 868, 900, 1068, 1175, 1264, 1324, 1493, 1583, 1600  $\text{cm}^{-1}$ . **HRMS-ESI** exact mass calcd. for  $\text{C}_{35}\text{H}_{23}\text{BrO}_2\text{Na}$  ( $[\text{M}+\text{Na}]^+$ ) requires  $m/z$  577.0774, found  $m/z$  577.0754.

The enantiomeric excess was determined by HPLC on Chiralcel OD-3 column (hexane : isopropanol = 90 : 10, flowing rate = 1.1 mL/min, 30 °C, UV detection at  $\lambda = 254$  nm),  $t_{\text{R}1} = 7.0$  min (major),  $t_{\text{R}2} = 9.6$  min (minor).

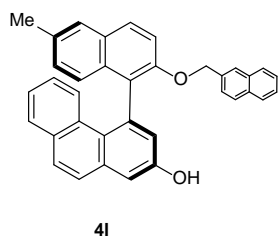

White solid; isolated yield 90%, 94% ee.  $[\alpha]_{\text{D}}^{20} = -88.0$  ( $c = 1.4$ ,  $\text{CHCl}_3$ );  **$^1\text{H}$  NMR** (400 MHz,  $\text{CDCl}_3$ ):  $\delta$  (ppm) 7.87 (d,  $J = 9.0$  Hz, 1H), 7.78 (dd,  $J = 8.0, 1.5$  Hz, 1H), 7.75 – 7.62 (m, 3H), 7.62 – 7.47 (m, 4H), 7.47 – 7.28 (m, 5H), 7.13 (s, 1H), 7.09 (dd,  $J = 8.7, 1.8$  Hz, 1H), 7.05 – 6.97 (m, 1H), 6.94 – 6.87 (m, 2H), 6.85 (dd,  $J = 8.5, 1.7$  Hz, 1H), 5.13 (d,  $J = 12.2$  Hz, 1H), 4.99 (s, 1H), 4.95 (d,  $J = 12.2$  Hz, 1H), 2.46 (s, 3H);  **$^{13}\text{C}$  NMR** (101MHz,  $\text{CDCl}_3$ ):  $\delta$  (ppm) 153.1, 151.8, 136.3, 135.4, 134.5, 133.9, 133.2, 132.9, 132.3, 131.5, 131.4, 130.2, 129.2, 128.8, 128.7, 128.6, 128.1, 128.0, 127.9, 127.6, 127.3, 127.0, 126.1, 126.0, 126.0, 125.9, 125.6, 125.6, 125.2, 125.2, 124.8, 121.7, 116.3, 112.5, 71.6, 21.6. **IR** (neat) 423, 433, 473, 503, 529, 579, 617, 674, 703, 719, 744, 817, 856, 995, 1054, 1175, 1219, 1269, 1332, 1454, 1598  $\text{cm}^{-1}$ . **HRMS-ESI** exact mass calcd. for  $\text{C}_{36}\text{H}_{26}\text{O}_2\text{Na}$  ( $[\text{M}+\text{Na}]^+$ ) requires  $m/z$  513.1825, found  $m/z$  513.1814.

The enantiomeric excess was determined by HPLC on Chiralcel IC-3 column (hexane :

isopropanol = 95 : 5, flowing rate = 1.0 mL/min, 30 °C, UV detection at  $\lambda = 254$  nm),  $t_{R1} = 9.1$  min (minor),  $t_{R2} = 11.3$  min (major).

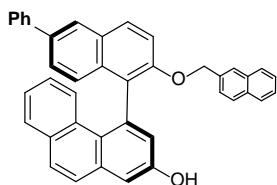

4m

Yellow solid; isolated yield 85%, 93% ee.  $[\alpha]_D^{20} = -67.0$  ( $c = 1.2$ ,  $\text{CHCl}_3$ );  $^1\text{H NMR}$  (400 MHz,  $\text{CDCl}_3$ ):  $\delta$  (ppm) 8.09 (s, 1H), 8.01 (d,  $J = 9.0$  Hz, 1H), 7.79 (d,  $J = 7.9$  Hz, 1H), 7.75 – 7.58 (m, 6H), 7.55 – 7.29 (m, 11H), 7.22 – 7.14 (m, 2H), 6.99 – 6.90 (m, 2H), 6.86 (d,  $J = 8.4$  Hz, 1H), 5.15 (d,  $J = 12.5$  Hz, 1H), 5.11 (s, 1H), 5.01 (d,  $J = 12.4$  Hz, 1H);  $^{13}\text{C NMR}$  (101MHz,  $\text{CDCl}_3$ ):  $\delta$  (ppm) 153.2, 152.6, 141.0, 136.9, 136.2, 135.5, 134.5, 133.2, 132.9, 132.5, 132.3, 131.3, 130.1, 129.8, 129.0, 128.7, 128.6, 128.2, 128.0, 128.0, 127.7, 127.3, 126.6, 126.3, 126.1, 126.0, 125.9, 125.9, 125.6, 125.3, 125.0, 124.8, 121.7, 116.5, 112.7, 71.4. **IR** (neat) 418, 426, 473, 504, 580, 696, 719, 744, 811, 856, 995, 1175, 1222, 1270, 1493, 1593. **HRMS-ESI** exact mass calcd. for  $\text{C}_{41}\text{H}_{28}\text{O}_2\text{Na}$  ( $[\text{M}+\text{Na}]^+$ ) requires  $m/z$  575.1982, found  $m/z$  575.1965.

The enantiomeric excess was determined by HPLC on Chiralcel IC-3 column (hexane : isopropanol = 92 : 8, flowing rate = 1.0 mL/min, 30 °C, UV detection at  $\lambda = 254$  nm),  $t_{R1} = 6.3$  min (minor),  $t_{R2} = 13.9$  min (major).

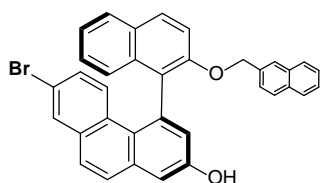

4n

White solid; isolated yield 92%, 94% ee.  $[\alpha]_D^{20} = -90$  ( $c = 0.8$ ,  $\text{CHCl}_3$ );  $^1\text{H NMR}$  (400 MHz,  $\text{CDCl}_3$ ):  $\delta$  (ppm) 7.96 (d,  $J = 9.0$  Hz, 1H), 7.92 – 7.84 (m, 2H), 7.76 – 7.68 (m, 2H), 7.60 (d,  $J = 8.9$  Hz, 1H), 7.51 (dd,  $J = 15.7, 6.9$  Hz, 2H), 7.46 (s, 1H), 7.45 – 7.31 (m, 7H), 7.21 (s, 1H), 6.96 (d,  $J = 2.8$  Hz, 1H), 6.89 (td,  $J = 9.2, 2.0$  Hz, 2H), 5.18 (d,  $J = 12.7$  Hz,

1H), 5.07 (d,  $J = 12.7$  Hz, 1H), 4.95 (s, 1H);  $^{13}\text{C}$  NMR (101MHz,  $\text{CDCl}_3$ ):  $\delta$  (ppm) 153.5, 152.4, 136.4, 135.4, 134.5, 133.8, 133.2, 133.1, 132.9, 130.6, 129.9, 129.8, 129.0, 128.5, 128.1, 128.0, 128.0, 127.9, 127.7, 127.3, 127.2, 127.1, 126.2, 126.0, 125.8, 125.4, 124.8, 124.6, 124.4, 122.0, 119.2, 116.0, 112.7, 71.2. **IR** (neat) 433, 473, 504, 716, 747, 779, 804, 861, 877, 994, 1174, 1217, 1268, 1370, 1452, 1605, 1738, 2918  $\text{cm}^{-1}$ . **HRMS-ESI** exact mass calcd. for  $\text{C}_{35}\text{H}_{23}\text{BrO}_2$  ( $[\text{M}+\text{H}]^+$ ) requires  $m/z$  554.0876, found  $m/z$  554.0873.

The enantiomeric excess was determined by HPLC on Chiralcel IC-3 column (hexane : isopropanol = 97 : 3, flowing rate = 1.0 mL/min, 25 °C, UV detection at  $\lambda = 254$  nm),  $t_{\text{R1}} = 14.3$  min (minor),  $t_{\text{R2}} = 16.4$  min (major).

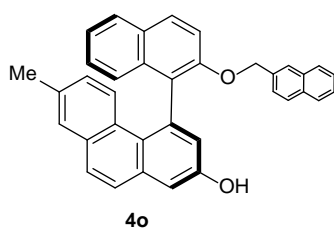

White solid; isolated yield 89%, 94% ee.  $[\alpha]_{\text{D}}^{20} = -131$  ( $c = 1.1$ ,  $\text{CHCl}_3$ );  $^1\text{H}$  NMR (400 MHz,  $\text{CDCl}_3$ ):  $\delta$  (ppm) 7.95 (d,  $J = 9.0$  Hz, 1H), 7.88 (d,  $J = 8.1$  Hz, 1H), 7.74 – 7.57 (m, 4H), 7.57 – 7.31 (m, 11H), 7.25 – 7.14 (m, 3H), 6.92 (d,  $J = 2.8$  Hz, 1H), 6.89 (dd,  $J = 8.4, 1.8$  Hz, 1H), 6.70 (dd,  $J = 8.8, 2.1$  Hz, 1H), 5.16 (d,  $J = 12.5$  Hz, 1H), 5.03 (d,  $J = 12.5$  Hz, 1H), 4.87 (s, 1H), 2.34 (s, 3H);  $^{13}\text{C}$  NMR (101MHz,  $\text{CDCl}_3$ ):  $\delta$  (ppm) 152.9, 152.4, 136.0, 135.1, 134.7, 134.6, 133.4, 133.2, 132.9, 132.5, 129.9, 129.5, 129.1, 128.7, 128.3, 128.1, 128.0, 128.0, 127.9, 127.9, 127.6, 127.3, 126.9, 126.0, 126.0, 125.9, 125.9, 125.7, 125.4, 125.0, 124.9, 124.3, 121.5, 116.2, 112.6, 71.3, 21.1. **IR** (neat) 404, 429, 473, 503, 535, 718, 746, 783, 808, 856, 885, 998, 1146, 1158, 1174, 1222, 1266, 1591, 1602  $\text{cm}^{-1}$ . **HRMS-ESI** exact mass calcd. for  $\text{C}_{36}\text{H}_{26}\text{O}_2\text{Na}$  ( $[\text{M}+\text{Na}]^+$ ) requires  $m/z$  513.1825, found  $m/z$  513.1816.



The enantiomeric excess was determined by HPLC on Chiralcel IA-3 column (hexane : isopropanol = 70 : 30, flowing rate = 1.0 mL/min, 25 °C, UV detection at  $\lambda = 254$  nm),  $t_{R1} = 5.5$  min (major),  $t_{R2} = 8.2$  min (minor).

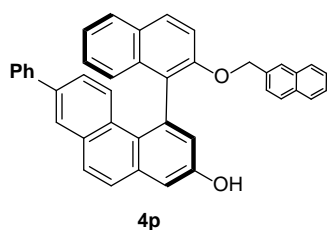

Yellow solid; isolated yield 93%, 95% ee.  $[\alpha]_D^{20} = -110$  ( $c = 1.2$ ,  $\text{CHCl}_3$ );  $^1\text{H NMR}$  (400 MHz,  $\text{CDCl}_3$ ):  $\delta$  (ppm) 8.04 – 7.93 (m, 2H), 7.93 – 7.84 (m, 1H), 7.84 – 7.70 (m, 2H), 7.66 (dd,  $J = 8.1$ , 3.2 Hz, 1H), 7.62 – 7.50 (m, 4H), 7.49 – 7.45 (m, 3H), 7.41 – 7.26 (m, 9H), 7.19 – 7.03 (m, 1H), 6.97 (q,  $J = 3.3$ , 2.9 Hz, 1H), 6.93 – 6.83 (m, 1H), 5.24 – 5.13 (m, 1H), 5.13 – 5.02 (m, 1H), 4.89 (s, 1H);  $^{13}\text{C NMR}$  (101MHz,  $\text{CDCl}_3$ ):  $\delta$  (ppm) 153.3, 152.5, 140.6, 137.5, 136.5, 135.6, 134.7, 133.4, 133.2, 132.9, 132.7, 130.5, 129.8, 129.6, 128.8, 128.6, 128.4, 128.1, 128.0, 128.0, 127.7, 127.6, 127.3, 127.2, 127.0, 126.4, 126.1, 126.0, 125.9, 125.8, 125.6, 125.2, 124.9, 124.8, 124.4, 121.7, 116.1, 112.7, 71.2. **IR** (neat) 414, 472, 501, 675, 696, 721, 756, 811, 856, 890, 996, 1052, 1173, 1220, 1265, 1328, 1459, 1600. **HRMS-ESI** exact mass calcd. for  $\text{C}_{41}\text{H}_{28}\text{O}_2$  ( $[\text{M}+\text{H}]^+$ ) requires  $m/z$  552.2084, found  $m/z$  552.2084.

The enantiomeric excess was determined by HPLC on Chiralcel IA-3 column (hexane : isopropanol = 75 : 25, flowing rate = 1.0 mL/min, 25 °C, UV detection at  $\lambda = 254$  nm),  $t_{R1} = 6.1$  min (major),  $t_{R2} = 9.1$  min (minor).

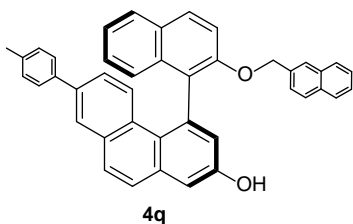

White solid; isolated yield 93%, 96% ee.  $[\alpha]_D^{20} = -111$  ( $c = 1.2$ ,  $\text{CHCl}_3$ );  $^1\text{H NMR}$  (400 MHz,  $\text{CDCl}_3$ ):  $\delta$  (ppm)  $\delta$  8.01 – 7.93 (m, 2H), 7.89 (d,  $J = 8.1$  Hz, 1H), 7.77 (d,  $J = 8.8$  Hz, 1H), 7.71 – 7.61 (m, 2H), 7.61 – 7.41 (m, 7H), 7.39 – 7.30 (m, 3H), 7.29 – 7.17 (m, 6H), 7.13 (dd,  $J = 9.0, 2.1$  Hz, 1H), 6.95 (d,  $J = 2.9$  Hz, 1H), 6.89 (dd,  $J = 8.4, 1.7$  Hz, 1H), 5.18 (d,  $J = 12.6$  Hz, 1H), 5.06 (d,  $J = 12.6$  Hz, 1H), 4.90 (s, 1H), 2.37 (s, 3H);  $^{13}\text{C NMR}$  (101MHz,  $\text{CDCl}_3$ ):  $\delta$  (ppm) 153.2, 152.5, 137.7, 137.4, 137.0, 136.3, 135.5, 134.6, 133.4, 133.2, 132.9, 132.7, 130.3, 129.8, 129.6, 128.5, 128.5, 128.0, 128.0, 127.6, 127.0, 127.0, 126.1, 126.0, 126.0, 125.9, 125.9, 125.7, 125.1, 125.0, 124.8, 124.4, 121.7, 116.1, 112.7, 71.3, 21.2. **IR** (neat) 403, 418, 473, 502, 520, 722, 747, 785, 813, 856, 891, 996, 1052, 1147, 1174, 1221, 1265, 1601  $\text{cm}^{-1}$ . **HRMS-ESI** exact mass calcd. for  $\text{C}_{42}\text{H}_{30}\text{O}_2\text{Na}$  ( $[\text{M}+\text{Na}]^+$ ) requires  $m/z$  589.2138, found  $m/z$  589.2129.

The enantiomeric excess was determined by HPLC on Chiralcel IA-3 column (hexane : isopropanol = 80 : 20, flowing rate = 1.0 mL/min, 25 °C, UV detection at  $\lambda = 254$  nm),  $t_{R1} = 9.1$  min (major),  $t_{R2} = 13.2$  min (minor).

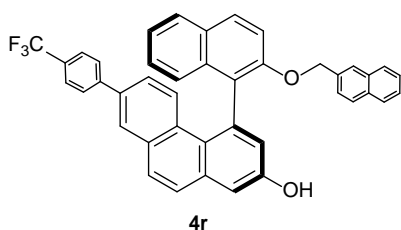

Yellow solid; isolated yield 89%, 90% ee.  $[\alpha]_D^{20} = -68$  ( $c = 1.5$ ,  $\text{CHCl}_3$ );  $^1\text{H NMR}$  (400 MHz,  $\text{CDCl}_3$ ):  $\delta$  (ppm) 7.98 (dd,  $J = 5.7, 3.5$  Hz, 2H), 7.90 (d,  $J = 8.1$  Hz, 1H), 7.78 (d,  $J = 2.7$  Hz, 2H), 7.71 – 7.59 (m, 5H), 7.57 (d,  $J = 9.0$  Hz, 1H), 7.51 – 7.41 (m, 4H), 7.39 – 7.27 (m, 5H), 7.23 (d,  $J = 6.0$  Hz, 1H), 7.09 (dd,  $J = 9.0, 2.2$  Hz, 1H), 6.98 (d,  $J = 2.8$  Hz, 1H), 6.89 (dd,  $J = 8.4, 1.7$  Hz, 1H), 5.19 (d,  $J = 12.7$  Hz, 1H), 5.09

(d,  $J = 12.7$  Hz, 1H);  $^{13}\text{C}$  NMR (101MHz,  $\text{CDCl}_3$ ):  $\delta$  (ppm) 153.5, 152.5, 144.1, 136.6, 135.8, 135.8, 134.6, 133.4, 133.1, 132.8, 132.6, 131.1, 129.8, 129.7, 128.4, 128.3, 128.1, 128.0, 128.0, 127.9, 127.6, 127.4, 127.1, 126.8, 126.3, 126.1, 125.9, 125.8, 125.8, 125.8, 125.7, 125.7, 125.5, 125.0, 124.9, 124.6, 124.4, 121.9, 116.1, 112.7, 71.2.  $^{19}\text{F}$  NMR (376 MHz,  $\text{CDCl}_3$ )  $\delta$  -62.4. **IR** (neat) 474, 503, 610, 722, 747, 789, 814, 849, 893, 1014, 1070, 1119, 1165, 1217, 1266, 1600  $\text{cm}^{-1}$ . **HRMS-ESI** exact mass calcd. for  $\text{C}_{42}\text{H}_{27}\text{O}_2\text{F}_3\text{Na}$  ( $[\text{M}+\text{Na}]^+$ ) requires  $m/z$  643.1855, found  $m/z$  643.1847.

The enantiomeric excess was determined by HPLC on Chiralcel IB-3 column (hexane : isopropanol = 90 : 10, flowing rate = 1.0 mL/min, 25 °C, UV detection at  $\lambda = 254$  nm),  $t_{\text{R}1} = 9.4$  min (major),  $t_{\text{R}2} = 11.3$  min (minor).

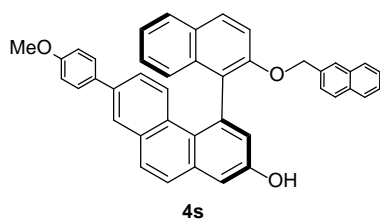

White solid; isolated yield 90%, 91% ee.  $[\alpha]_{\text{D}}^{20} = -57$  ( $c = 2.2$ ,  $\text{CHCl}_3$ );  $^1\text{H}$  NMR (400 MHz,  $\text{CDCl}_3$ ):  $\delta$  (ppm) 7.97 (s, 1H), 7.96 – 7.91 (m, 1H), 7.91 – 7.84 (m, 1H), 7.76 (d,  $J = 8.8$  Hz, 1H), 7.73 – 7.62 (m, 2H), 7.52 (dd,  $J = 8.6, 5.6$  Hz, 4H), 7.45 (dt,  $J = 8.8, 2.2$  Hz, 3H), 7.40 – 7.26 (m, 5H), 7.23 (d,  $J = 6.6$  Hz, 1H), 7.09 (dd,  $J = 9.0, 2.2$  Hz, 1H), 6.99 – 6.81 (m, 4H), 5.17 (d,  $J = 12.8$  Hz, 1H), 5.06 (d,  $J = 12.8$  Hz, 1H), 4.94 (s, 1H), 3.83 (s, 3H);  $^{13}\text{C}$  NMR (101MHz,  $\text{CDCl}_3$ ):  $\delta$  (ppm) 159.2, 153.2, 152.5, 137.1, 136.3, 135.4, 134.7, 133.4, 133.1, 133.1, 132.8, 132.7, 130.0, 129.8, 129.5, 128.5, 128.5, 128.2, 128.0, 127.9, 127.6, 127.0, 126.0, 126.0, 125.9, 125.8, 125.8, 125.7, 124.9, 124.9, 124.8, 124.3, 121.6, 116.1, 114.3, 112.7, 71.2, 55.5. **IR** (neat) 417, 472, 507, 529, 650, 720, 746, 787, 812, 856, 996, 1018, 1052, 1146, 1173, 1220, 1245, 1458, 1508.  $\text{cm}^{-1}$  **HRMS-ESI** exact mass

calcd. for  $C_{42}H_{30}O_3Na$  ( $[M+Na]^+$ ) requires  $m/z$  605.2087, found  $m/z$  605.2075.

The enantiomeric excess was determined by HPLC on Chiralcel IC-3 column (hexane : isopropanol = 90 : 10, flowing rate = 1.0 mL/min, 25 °C, UV detection at  $\lambda = 254$  nm),  $t_{R1} = 4.7$  min (minor),  $t_{R2} = 5.4$  min (major).

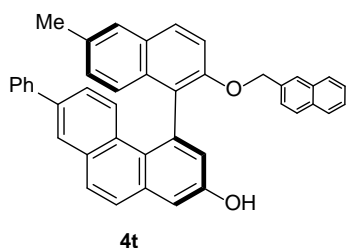

4t

White solid; isolated yield 90%, 94% ee.  $[\alpha]_D^{20} = -27$  ( $c = 1.2$ ,  $CHCl_3$ );  $^1H$  NMR (400 MHz,  $CDCl_3$ ):  $\delta$  (ppm) 7.99 (d,  $J = 2.1$  Hz, 1H), 7.88 (d,  $J = 9.0$  Hz, 1H), 7.77 (d,  $J = 8.8$  Hz, 1H), 7.72 – 7.63 (m, 3H), 7.58 (t,  $J = 8.4$  Hz, 3H), 7.51 (d,  $J = 8.5$  Hz, 1H),

7.49 – 7.27 (m, 9H), 7.21 (s, 1H), 7.16 – 7.09 (m, 2H), 6.94 (d,  $J = 2.8$  Hz, 1H), 6.88 (dd,  $J = 8.5$ , 1.7 Hz, 1H), 5.15 (d,  $J = 12.6$  Hz, 1H), 5.04 (d,  $J = 12.7$  Hz, 1H), 4.96 (s, 1H), 2.46 (s, 3H);  $^{13}C$  NMR (101MHz,  $CDCl_3$ ):  $\delta$  (ppm) 153.2, 151.9, 140.6, 137.4, 136.6, 135.5, 134.7, 133.9, 133.1, 132.8, 132.7, 131.6, 130.5, 130.1, 129.3, 128.8, 128.5, 128.4, 128.0, 127.9, 127.7, 127.6, 127.3, 127.2, 127.0, 126.4, 126.1, 126.0, 125.9, 125.9, 125.5, 125.2, 125.0, 124.8, 121.7, 116.3, 112.6, 71.3, 21.6. **IR** (neat) 411, 472, 499, 520, 675, 696, 720, 757, 819, 857, 888, 995, 1054, 1172, 1219, 1268, 1332, 1459, 1599. **HRMS-ESI** exact mass calcd. for  $C_{42}H_{30}O_2$  ( $[M+H]^+$ ) requires  $m/z$  566.2240, found  $m/z$  566.2235.

The enantiomeric excess was determined by HPLC on Chiralcel IC-3 column (hexane : isopropanol = 75 : 25, flowing rate = 1.0 mL/min, 30 °C, UV detection at  $\lambda = 254$  nm),  $t_{R1} = 5.5$  min (minor),  $t_{R2} = 6.6$  min (major).

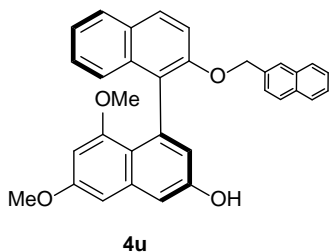

White solid; isolated yield 89%, 23% ee.  $[\alpha]_D^{20} = +6.6$  ( $c = 0.5$ ,  $\text{CHCl}_3$ );  $^1\text{H NMR}$  (400 MHz,  $\text{CDCl}_3$ ):  $\delta$  (ppm) 7.80 (dd,  $J = 8.6$ , 2.5 Hz, 2H), 7.74 (dd,  $J = 6.1$ , 3.4 Hz, 1H), 7.65 (d,  $J = 8.5$  Hz, 1H), 7.60 (dd,  $J = 6.1$ , 3.4 Hz, 1H), 7.46 – 7.35 (m, 4H), 7.31 – 7.22 (m, 3H), 7.14 (dd,  $J = 6.9$ , 2.1 Hz, 2H), 6.73 (d,  $J = 2.3$  Hz, 1H), 6.67 (d,  $J = 2.4$  Hz, 1H), 6.18 (d,  $J = 2.4$  Hz, 1H), 5.25 – 5.12 (m, 2H), 4.83 (s, 1H), 3.91 (s, 3H), 3.04 (s, 3H);  $^{13}\text{C NMR}$  (101MHz,  $\text{CDCl}_3$ ):  $\delta$  (ppm) 158.7, 158.5, 153.7, 152.0, 138.3, 135.2, 135.1, 134.0, 133.3, 132.9, 129.8, 129.1, 128.1, 127.9, 127.9, 127.7, 127.6, 126.0, 126.0, 125.9, 125.2, 123.5, 118.7, 117.0, 116.2, 109.3, 98.2, 97.1, 71.8, 55.4. **IR** (neat) 747, 813, 855, 1157, 1205, 1352, 1507, 1618, 1739, 2360. **HRMS-ESI** exact mass calcd. for  $\text{C}_{36}\text{H}_{27}\text{O}_4$  ( $[\text{M}+\text{H}]^+$ ) requires  $m/z$  487.1904, found  $m/z$  487.1896.

The ee was determined by HPLC on Chiralcel IC-3 column (hexane : isopropanol = 90 : 10, flowing rate = 1.0 mL/min, 30 °C, UV detection at  $\lambda = 254$  nm),  $t_{R1} = 8.4$  min (major),  $t_{R2} = 9.6$  min (minor).

## 5. Transformation of 4a into 12.<sup>[4]</sup>

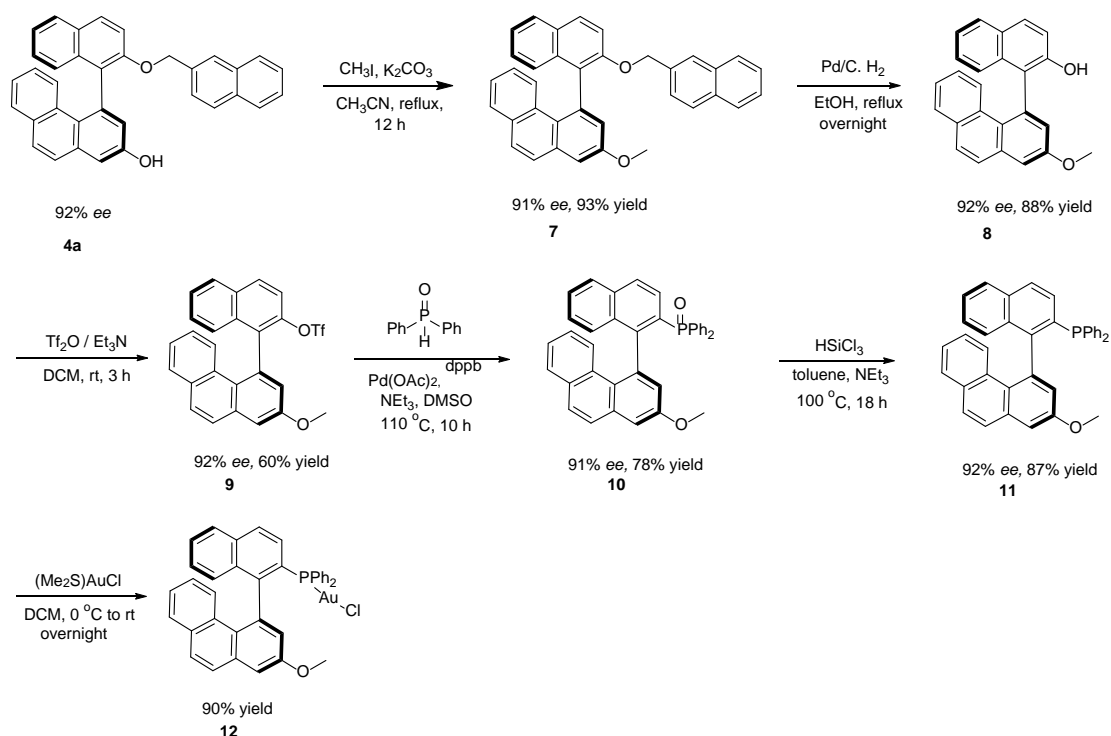

**4a** (69 mg, 0.14 mmol) and  $\text{K}_2\text{CO}_3$  (60 mg, 0.43 mmol) were dissolved in 10 mL of acetonitrile. Then,  $\text{MeI}$  (27  $\mu\text{L}$ , 0.43 mmol) was added and the reaction heated to  $80^\circ\text{C}$  in a sealed flask for 12 hours. After this time, the reaction mixture was cooled and 5 mL of water were added. The desired product was then extracted with ethylacetate and the organic layer was dried over anhydrous  $\text{Mg}_2\text{SO}_4$  and evaporated under reduced pressure. Compound **7** (64 mg, 93%) was obtained as a light yellow oil. 91% ee.  $[\alpha]_{\text{D}}^{20} = -173$  ( $c = 1.2$ ,  $\text{CHCl}_3$ );  $^1\text{H NMR}$  (400 MHz,  $\text{CDCl}_3$ ):  $\delta$  (ppm) 7.96 (d,  $J = 9.0$  Hz, 1H), 7.93 – 7.86 (m, 1H), 7.79 (dt,  $J = 15.2, 8.8$  Hz, 3H), 7.73 – 7.64 (m, 1H), 7.61 – 7.48 (m, 3H), 7.48 – 7.32 (m, 6H), 7.32 – 7.25 (m, 2H), 7.20 (s, 1H), 7.13 (d,  $J = 2.9$  Hz, 1H), 6.94 – 6.82 (m, 2H), 5.16 (d,  $J = 12.7$  Hz, 1H), 5.04 (d,  $J = 12.7$

Hz, 1H), 3.95 (s, 3H);  $^{13}\text{C}$  NMR (101 MHz,  $\text{CDCl}_3$ ):  $\delta$  (ppm) 157.3, 152.6, 136.1, 135.4, 134.8, 133.4, 133.2, 132.8, 132.3, 131.4, 129.8, 129.5, 128.7, 128.6, 128.2, 128.0, 128.0, 127.9, 127.6, 127.6, 126.9, 126.0, 126.0, 125.8, 125.8, 125.6, 125.2, 124.9, 124.8, 124.2, 121.7, 116.0, 109.7, 71.1, 55.5. **IR** (neat) 696, 719, 741, 805, 853, 1016, 1042, 1057, 1173, 1217, 1227, 1265, 1372, 1455, 1507, 1595, 1739  $\text{cm}^{-1}$ . **HRMS-ESI** exact mass calcd. for  $\text{C}_{36}\text{H}_{27}\text{O}_2$  ( $[\text{M}+\text{H}]^+$ ) requires  $m/z$  491.2006, found  $m/z$  491.1991. The enantiomeric excess was determined by HPLC on Chiralcel IA-3 column (hexane : isopropanol = 97 : 3, flowing rate = 1.0 mL/min, 25 °C, UV detection at  $\lambda = 254$  nm),  $t_{\text{R}1} = 4.5$  min (major),  $t_{\text{R}2} = 5.6$  min (minor).

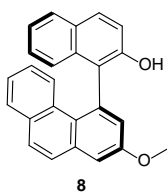

To a stirred solution of compound **7** (64 mg, 0.13 mmol) in EtOH (10 mL), 10% Pd/C (15 mg) was added and  $\text{H}_2$  (1 atm) was bubbled through the reaction mixture. After stirring the reaction for 12h under  $\text{H}_2$  atmosphere, the reaction was filtered through celite, all solvents was evaporated under reduced pressure and the remaining oil purified by column chromatography on silica gel (4% Acetone/hexanes as eluent). Compound **8** (40 mg, 88% yield) was obtained as a yellow foam. 92% *ee*.  $[\alpha]_{\text{D}}^{20} = +76$  ( $c = 0.8$ ,  $\text{CHCl}_3$ ).  $^1\text{H}$  NMR (400 MHz,  $\text{CDCl}_3$ ):  $\delta$  (ppm) 7.95 (d,  $J = 8.9$  Hz, 1H), 7.89 (dt,  $J = 8.3, 1.0$  Hz, 1H), 7.78 (d,  $J = 2.9$  Hz, 3H), 7.58 (d,  $J = 8.7$  Hz, 1H), 7.46 (dd,  $J = 2.8, 0.8$  Hz, 1H), 7.38 – 7.28 (m, 3H), 7.23 (dt,  $J = 5.9, 1.2$  Hz, 2H), 7.18 (d,  $J = 2.8$  Hz, 1H), 7.00 – 6.89 (m, 1H), 4.94 (s, 1H), 3.98 (d,  $J = 1.9$  Hz, 3H);  $^{13}\text{C}$  NMR (101 MHz,  $\text{CDCl}_3$ ):  $\delta$  (ppm) 157.8, 149.8, 136.1, 133.0, 132.9, 132.3, 130.6, 130.0, 129.5, 129.0, 128.7, 128.2, 127.3, 127.0, 126.7, 125.7, 125.1, 125.0, 124.5, 123.8, 123.5, 122.4, 118.0, 111.2, 55.6. **IR** (neat)

697, 719, 811, 854, 1030, 1057, 1136, 1158, 1171, 1199, 1216, 1230, 1256, 1340, 1381, 1454, 1595, 1738  $\text{cm}^{-1}$ . **HRMS-ESI** exact mass calcd. for  $\text{C}_{25}\text{H}_{19}\text{O}_2$  ( $[\text{M}+\text{H}]^+$ ) requires  $m/z$  351.1380, found  $m/z$  351.1373. The enantiomeric excess was determined by HPLC on Chiralcel IG-K column (hexane : isopropanol = 90 : 10, flowing rate = 0.4 mL/min, 25 °C, UV detection at  $\lambda = 254$  nm),  $t_{\text{R}1} = 4.2$  min (major),  $t_{\text{R}2} = 5.3$  min (minor).

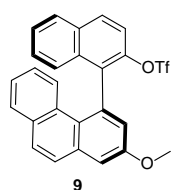

Trifluoromethanesulfonic anhydride (25  $\mu\text{L}$ , 0.15 mmol) was added dropwise at 0 °C to a stirred dichloromethane (4.0 mL) solution of **8** (40 mg, 0.11 mmol) and pyridine (18  $\mu\text{L}$ , 0.22 mmol). The mixture was allowed to warm to rt and stirred for additional 3 h. Then, a 10% aqueous HCl solution was added, and the quenched mixture was extracted by dichloromethane. The organic phases were washed with saturated  $\text{NaHCO}_3$ , dried over  $\text{Na}_2\text{SO}_4$ , and concentrated under a vacuum. Column chromatography on  $\text{SiO}_2$  (eluent, 2% Acetone/hexanes) allowed the obtention of the desired triflate **9** as a yellow oil (32 mg, 60% yield). 92% *ee*.  $[\alpha]_{\text{D}}^{20} = +21$  ( $c = 1.0$ ,  $\text{CHCl}_3$ );  **$^1\text{H}$  NMR** (400 MHz,  $\text{CDCl}_3$ ):  $\delta$  (ppm) 8.10 (d,  $J = 9.1$  Hz, 1H), 8.01 (dd,  $J = 8.3, 1.1$  Hz, 1H), 7.83 – 7.71 (m, 3H), 7.62 – 7.50 (m, 3H), 7.47 (d,  $J = 2.8$  Hz, 1H), 7.38 – 7.29 (m, 2H), 7.18 – 7.15 (m, 2H), 6.91 – 6.87 (m, 1H), 3.99 (s, 3H);  **$^{13}\text{C}$  NMR** (101 MHz,  $\text{CDCl}_3$ ):  $\delta$  (ppm) 157.0, 144.0, 135.5, 134.8, 133.1, 132.9, 132.4, 131.8, 130.5, 130.3, 128.9, 128.6, 128.3, 128.1, 127.5, 127.4, 127.1, 126.1, 125.4, 125.2, 124.2, 121.8, 120.1, 119.9, 116.7, 111.2, 55.7.  **$^{19}\text{F}$  NMR** (376 MHz,  $\text{CDCl}_3$ )  $\delta$  (ppm) -74.6. **IR** (neat) 768, 781, 855, 895, 1029, 1112, 1273, 1304, 1323, 1343, 1380, 1456, 1507, 1738  $\text{cm}^{-1}$ . **HRMS-ESI** exact mass calcd. for  $\text{C}_{26}\text{H}_{18}\text{F}_3\text{O}_4\text{S}$  ( $[\text{M}+\text{H}]^+$ ) requires  $m/z$  483.0872, found  $m/z$  483.0869. The enantiomeric excess was determined by



HPLC on Chiralcel IG-K column (hexane : isopropanol = 95 : 5, flowing rate = 0.4 mL/min, 25 °C, UV detection at  $\lambda = 254$  nm),  $t_{R1} = 2.0$  min (major),  $t_{R2} = 3.3$  min (minor).

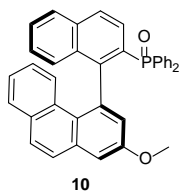

Triflate **9** (32 mg, 0.066 mmol, 91% ee) was dissolved in DMSO (4 mL, pre-deoxygenized by ultrasonic) and Ph<sub>2</sub>P(O)H (54 mg, 0.27 mmol), Pd(OAc)<sub>2</sub> (1.5 mg, 0.0066 mmol), and dppb (3.4 mg, 0.008 mmol) were added to the solution. Then, NEt<sub>3</sub> (33  $\mu$ L) was added and the reaction mixture was heated to 110 °C for 10 h. After completion of the reaction, dichloromethane was added and the reaction quenched by hydrochloric acid (1 M). The resulting mixture was extracted with dichloromethane and the organic layer successively washed by saturated NaHCO<sub>3</sub> aqueous solution and saturated NaCl aqueous solution, and finally dried with anhydrous Na<sub>2</sub>SO<sub>4</sub>. Solvents were removed in vacuo and the remaining oil purified by flash column chromatography (eluent: hexanes/Acetone = 3:1, v/v) to afford compound **10** as a white solid (27 mg, 78% yield). 91% ee.  $[\alpha]_D^{20} = -23$  ( $c = 1.0$ , CHCl<sub>3</sub>); **<sup>1</sup>H NMR** (400 MHz, CDCl<sub>3</sub>):  $\delta$  (ppm) 8.13 – 8.00 (m, 2H), 7.94 (d,  $J = 8.2$  Hz, 1H), 7.66 (dd,  $J = 7.9, 1.4$  Hz, 1H), 7.56 – 7.37 (m, 5H), 7.26 – 7.20 (m, 3H), 7.18 – 7.11 (m, 4H), 7.10 (d,  $J = 2.9$  Hz, 1H), 7.06 (d,  $J = 8.7$  Hz, 1H), 7.04 – 6.98 (m, 3H), 6.87 – 6.75 (m, 3H), 3.82 (s, 3H); **<sup>13</sup>C NMR** (101 MHz, CDCl<sub>3</sub>):  $\delta$  (ppm) 156.5, 147.9, 147.8, 136.6, 136.6, 135.0, 135.0, 134.8, 133.1, 132.9, 132.8, 132.7, 132.3, 132.1, 132.0, 131.9, 131.2, 131.1, 131.0, 131.0, 130.7, 130.7, 129.5, 129.4, 128.9, 128.6, 128.4, 128.1, 128.1, 128.1, 128.0, 127.9, 127.7, 127.5, 127.5, 127.4, 127.4, 127.3, 127.1, 126.2, 125.7, 124.9, 124.1, 121.2, 121.2, 112.0, 55.6. **<sup>31</sup>P NMR** (162 MHz, CDCl<sub>3</sub>)  $\delta$  (ppm) 28.3. **IR** (neat) 719, 746, 865, 1061, 1111, 1157, 1204, 1217, 1365, 1395,

1437, 1457, 1599, 1738, 2342, 2359  $\text{cm}^{-1}$ . **HRMS-ESI** exact mass calcd. for  $\text{C}_{37}\text{H}_{28}\text{O}_2\text{P}$  ( $[\text{M}+\text{H}]^+$ ) requires  $m/z$  534.1743, found  $m/z$  534.1743. The enantiomeric excess was determined by HPLC on Chiralcel IA-3 column (hexane : isopropanol = 70 : 30, flowing rate = 1.0 mL/min, 25 °C, UV detection at  $\lambda = 254$  nm),  $t_{\text{R}1} = 6.0$  min (major),  $t_{\text{R}2} = 7.3$  min (minor).

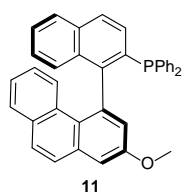

To a dried Schlenk flask charged with the compound **10** (27 mg, 0.05 mmol) in dry toluene (100 mL), Et<sub>3</sub>N (35.7 mg, 49  $\mu\text{L}$ , 0.35 mmol) and HSiCl<sub>3</sub> (34.5 mg, 25  $\mu\text{L}$ , 0.25 mmol) were added successively under argon at 0 °C and the resulting mixture stirred at 100 °C for 18 h. After this, the reaction was diluted with Et<sub>2</sub>O (10 mL), quenched with saturated Na<sub>2</sub>CO<sub>3</sub> solution and the mixture filtered by a short Celite column. Concentration of the ethereal phase afforded an oil that was purified by flash chromatography on silica gel (hexanes/Acetone = 30:1, v/v) to afford t **11** as a white solid (23 mg, 87% yield). 92% *ee*.  $[\alpha]_{\text{D}}^{20} = -78$  ( $c = 0.6$ , CHCl<sub>3</sub>); **<sup>1</sup>H NMR** (400 MHz, CDCl<sub>3</sub>):  $\delta$  (ppm) 7.92 (t,  $J = 8.6$  Hz, 2H), 7.84 – 7.70 (m, 3H), 7.47 (ddd,  $J = 8.2, 6.7, 1.3$  Hz, 1H), 7.40 (td,  $J = 4.2, 2.8$  Hz, 2H), 7.35 (d,  $J = 8.7$  Hz, 1H), 7.30 (q,  $J = 7.4, 6.1$  Hz, 5H), 7.26 – 7.10 (m, 6H), 6.98 (td,  $J = 7.7, 7.2, 1.5$  Hz, 2H), 6.89 (ddd,  $J = 8.6, 6.9, 1.5$  Hz, 1H), 6.73 (d,  $J = 2.8$  Hz, 1H), 3.59 (s, 3H); **<sup>13</sup>C NMR** (101 MHz, CDCl<sub>3</sub>):  $\delta$  (ppm) 156.5, 149.6, 149.3, 139.0, 138.9, 138.2, 138.1, 137.4, 137.3, 135.2, 134.1, 134.0, 133.9, 133.6, 133.5, 133.5, 133.3, 132.5, 132.4, 131.1, 130.8, 130.7, 128.7, 128.5, 128.5, 128.4, 128.3, 128.2, 128.2, 128.0, 127.6, 127.1, 127.0, 127.0, 126.8, 126.2, 126.0, 125.0, 124.1, 124.1, 120.8, 120.8, 111.4, 55.2. **<sup>31</sup>P NMR** (162 MHz, CDCl<sub>3</sub>)  $\delta$  (ppm) -13.4. **IR** (neat) 423, 433, 487, 502, 515, 670, 694, 741,

811, 868, 1200, 1216, 1228, 1342, 1364, 1739, 2359  $\text{cm}^{-1}$ . **HRMS-ESI** exact mass calcd. for  $\text{C}_{37}\text{H}_{28}\text{OP}$  ( $[\text{M}+\text{H}]^+$ ) requires  $m/z$  519.1872, found  $m/z$  519.1864. The enantiomeric excess was determined by HPLC on Chiralcel IA-3 column (hexane : isopropanol = 95 : 5, flowing rate = 1.0 mL/min, 25 °C, UV detection at  $\lambda = 254$  nm),  $t_{\text{R1}} = 3.1$  min (major),  $t_{\text{R2}} = 4.1$  min (minor).

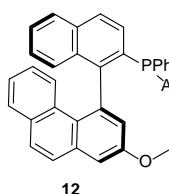

Compound **11** (23 mg, 0.044 mmol) and  $\text{AuCl}\cdot\text{S}(\text{Me})_2$  (13 mg, 0.044 mmol) were stirred in dichloromethane (3 mL) overnight at rt. After this, all volatiles were removed under reduced pressure, and the residue was purified by silica gel flash column chromatography to afford gold-complex **12** (29.7 mg) in 90% yield as a white solid. Crystals of complex **12** were grown from in a saturated solution of EtOAc/pentane.  $^1\text{H NMR}$  (400 MHz,  $\text{CDCl}_3$ ):  $\delta$  (ppm) 8.05 – 7.90 (m, 2H), 7.78 (d,  $J = 8.8$  Hz, 1H), 7.74 – 7.64 (m, 2H), 7.62 – 7.52 (m, 1H), 7.50 – 7.29 (m, 8H), 7.28 – 7.14 (m, 5H), 7.10 (td,  $J = 7.7, 2.6$  Hz, 2H), 6.94 (d,  $J = 8.6$  Hz, 1H), 6.80 – 6.67 (m, 2H), 3.80 (s, 3H);  $^{13}\text{C NMR}$  (101 MHz,  $\text{CDCl}_3$ ):  $\delta$  (ppm)  $\delta$  156.9, 149.9, 149.8, 136.2, 136.1, 135.9, 134.7, 134.6, 134.4, 134.3, 134.2, 134.1, 133.2, 133.1, 132.6, 131.6, 131.6, 131.3, 131.2, 130.5, 130.5, 129.9, 129.2, 129.1, 129.1, 129.0, 129.0, 128.8, 128.7, 128.6, 128.6, 128.5, 128.3, 128.1, 127.8, 127.8, 127.6, 127.6, 125.9, 125.3, 125.1, 124.4, 124.4, 123.8, 121.5, 111.8, 55.4.  $^{31}\text{P NMR}$  (162 MHz,  $\text{CDCl}_3$ )  $\delta$  (ppm) 25.8. **IR** (neat) 420, 495, 520, 549, 657, 669, 691, 741, 754, 820, 1061, 1217, 1227, 1342, 1365, 1437, 1738, 2359  $\text{cm}^{-1}$ . **HRMS-ESI** exact mass calcd. for  $\text{C}_{37}\text{H}_{27}\text{AuClOP}$  ( $[\text{M}+\text{Na}]^+$ ) requires  $m/z$  773.1046, found  $m/z$  773.1027.

## 6. Crystal Structure of 12

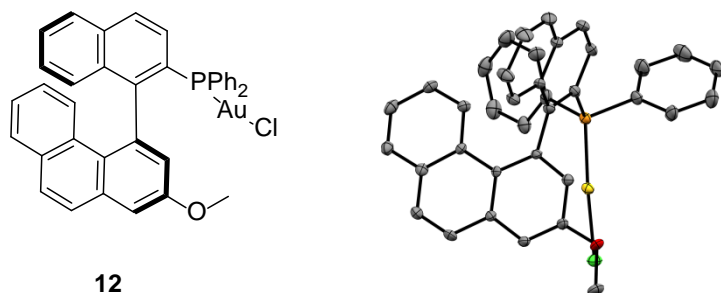

Basic information pertaining to crystal parameters and structure refinement is summarized in Table 1.

Table 1. Crystal data and structure refinement for **12**.

| Identification code                  | <b>12</b>                                                      |
|--------------------------------------|----------------------------------------------------------------|
| Empirical formula                    | C <sub>37</sub> H <sub>27</sub> AuClOP                         |
| Formula weight                       | 750.97                                                         |
| Temperature/K                        | 100.0                                                          |
| Crystal system                       | monoclinic                                                     |
| Space group                          | P2 <sub>1</sub>                                                |
| a/Å                                  | 10.3807(6)                                                     |
| b/Å                                  | 17.0354(10)                                                    |
| c/Å                                  | 16.6056(10)                                                    |
| α/°                                  | 90                                                             |
| β/°                                  | 90.131(2)                                                      |
| γ/°                                  | 90                                                             |
| Volume/Å <sup>3</sup>                | 2936.5(3)                                                      |
| Z                                    | 4                                                              |
| ρ <sub>calc</sub> /g/cm <sup>3</sup> | 1.699                                                          |
| μ/mm <sup>-1</sup>                   | 5.185                                                          |
| F(000)                               | 1472.0                                                         |
| Crystal size/mm <sup>3</sup>         | 0.31 × 0.11 × 0.086                                            |
| Radiation                            | MoKα (λ = 0.71073)                                             |
| 2θ range for data collection/°       | 3.924 to 69.564                                                |
| Index ranges                         | -15 ≤ h ≤ 16, -26 ≤ k ≤ 27, -26 ≤ l ≤ 26                       |
| Reflections collected                | 168361                                                         |
| Independent reflections              | 22935 [R <sub>int</sub> = 0.0423, R <sub>sigma</sub> = 0.0310] |
| Data/restraints/parameters           | 22935/4/761                                                    |
| Goodness-of-fit on F <sup>2</sup>    | 1.200                                                          |
| Final R indexes [I ≥ 2σ (I)]         | R <sub>1</sub> = 0.0339, wR <sub>2</sub> = 0.0679              |

Final R indexes [all data]  $R_1 = 0.0373$ ,  $wR_2 = 0.0696$   
Largest diff. peak/hole /  $e \text{ \AA}^{-3}$  2.50/-4.05  
Flack parameter 0.0000(14)

---

## 7. References

- [1] L. D. M. Nicholls, M. Marx, T. Hartung, E. G. -Fernández, C. Golz, M. Alcarazo, *ACS Catal.* **2018**, *8*, 6079-6085.
- [2] (a) L. F. Tietze, M. A. Düfert, T. Hungerland, K. Oum, T. Lenzer, *Chem. Eur. J.* **2011**, *17*, 8452-8461. (b) G. Nishida, K. Noguchi, M. Hirano, K. Tanaka, *Angew. Chem. Int. Ed.* **2007**, *46*, 3951-3954. (c) M. Satoh, Y. Shibata, Y. Kimura, K. Tanaka, *Eur. J. Org. Chem.* **2016**, 4465-4469.
- [3] (a) S. S. Mahajan, M. Scian, S. Sripathy, J. Posakony, U. Lao, T. K. Loe, V. Leko, A. Thalhofer, A. D. Schuler, A. Bedalov, J. A. Simon, *J. Med. Chem.* **2014**, *57*, 3283-3294. (b) D. Li, Y. Wei, I. Marek, X. Tang, M. Shi, *Chem. Soc.*, **2015**, *6*, 5519-5525.
- [4] (a) G. Cruciani, N. Milani, P. Benedetti, S. Lepri, L. Cesarini, M. Baroni, F. Spyrikis, S. Tortorella, E. Mosconi, L. Goracci, *J. Med. Chem.* **2018**, *61*, 360-371. (b) T. Hayashi, S. Hirate, K. Kitayama, H. Tsuji, A. Torii, Y. Uozumi, *Chem. Lett.* **2000**, *29*, 1272-1273. (c) L. Zheng, L. Li, K. Yang, Z. Zheng, X. Xiao, L. Xu, *Tetrahedron.* **2013**, *69*, 8777-8784.

## 8. NMR spectra

### Compound 2a

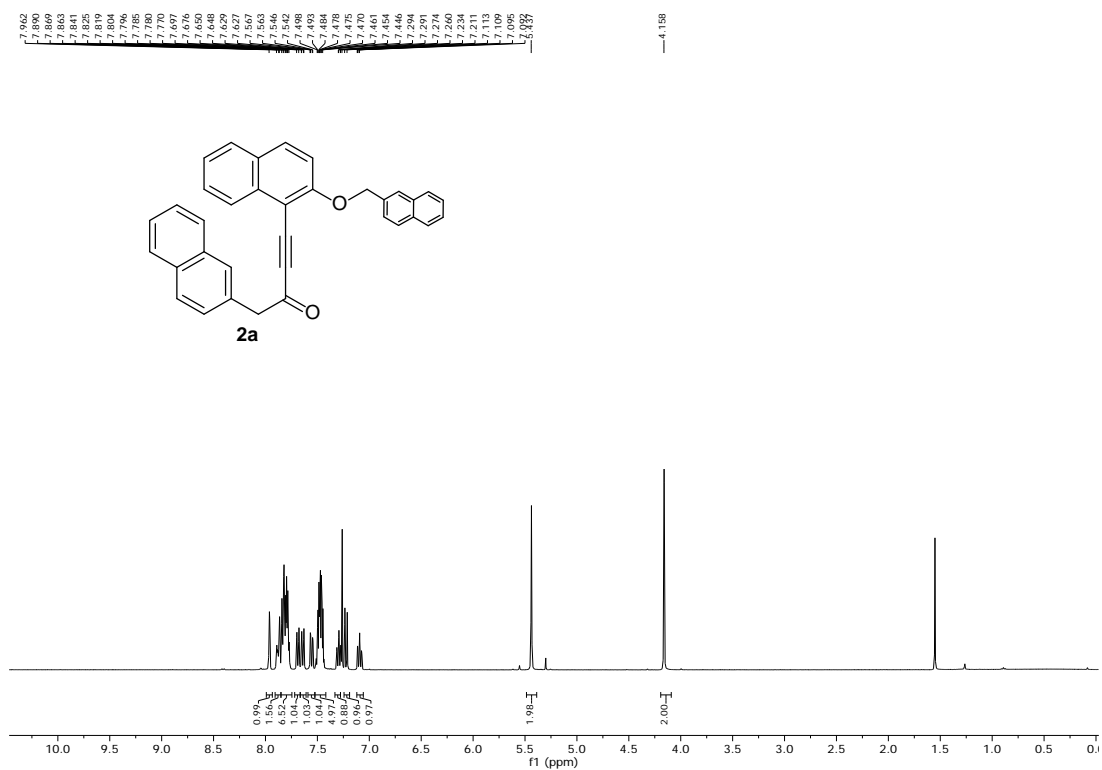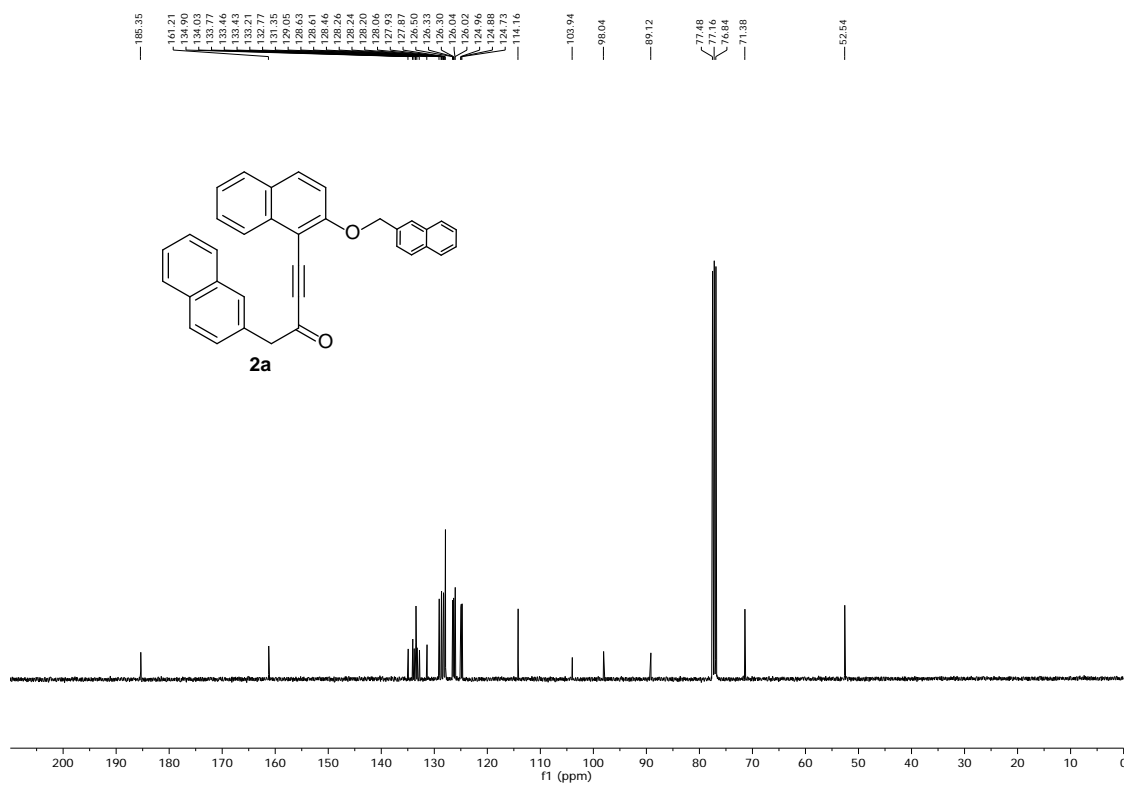



# Compound 2c

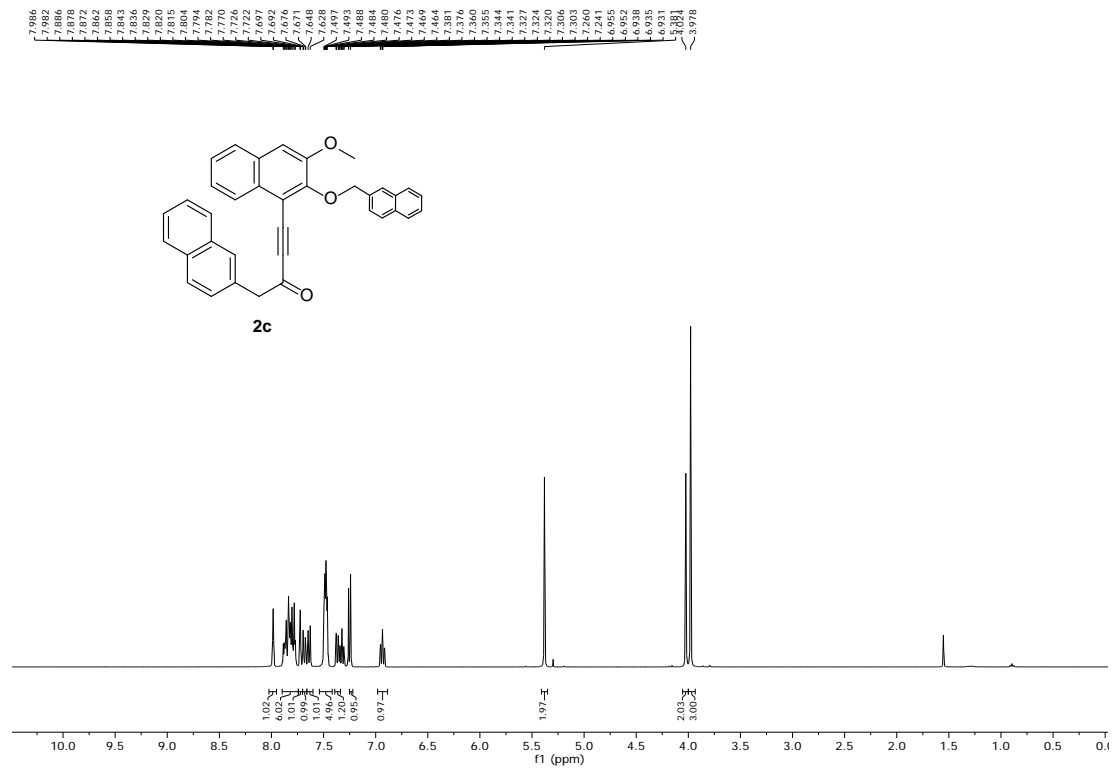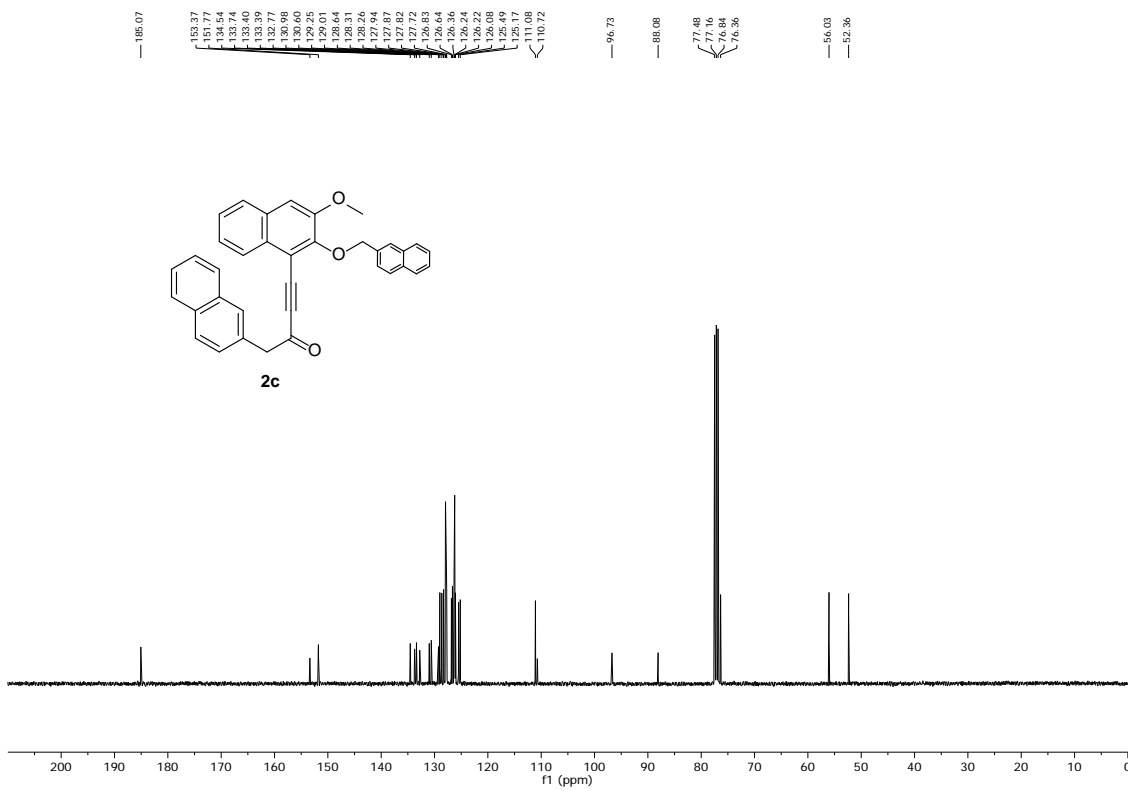





# Compound 2e

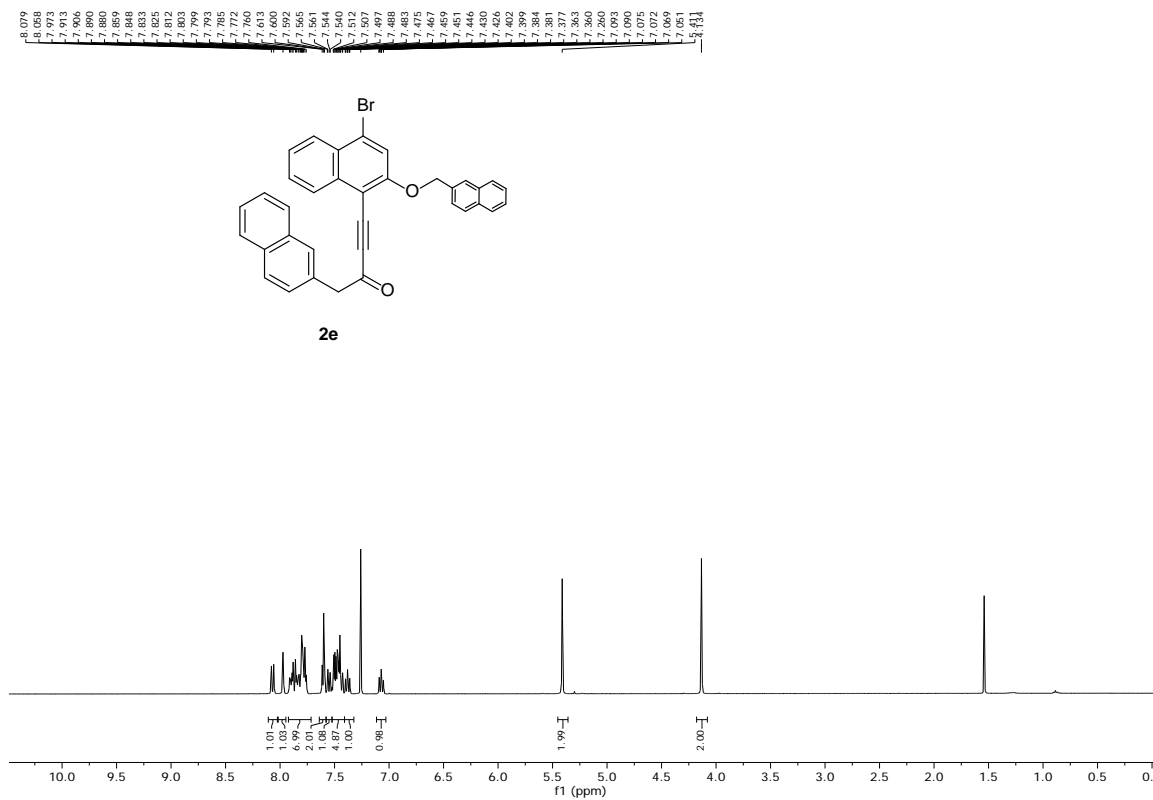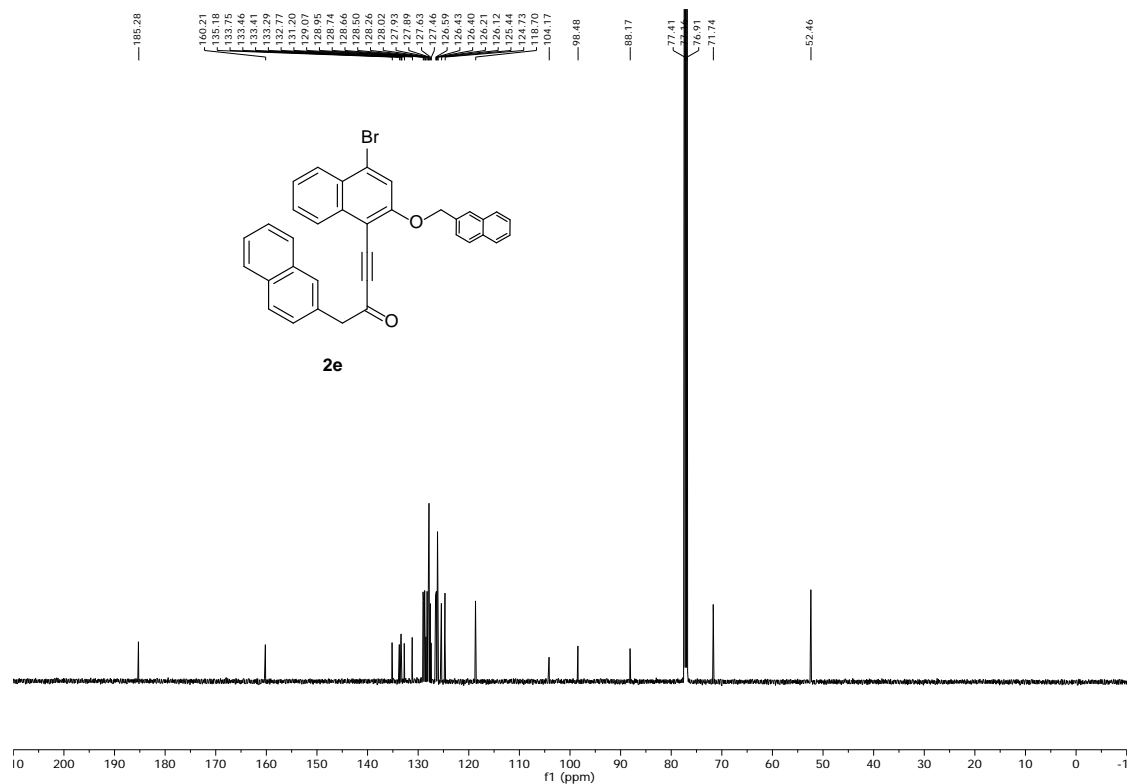

# Compound 2f

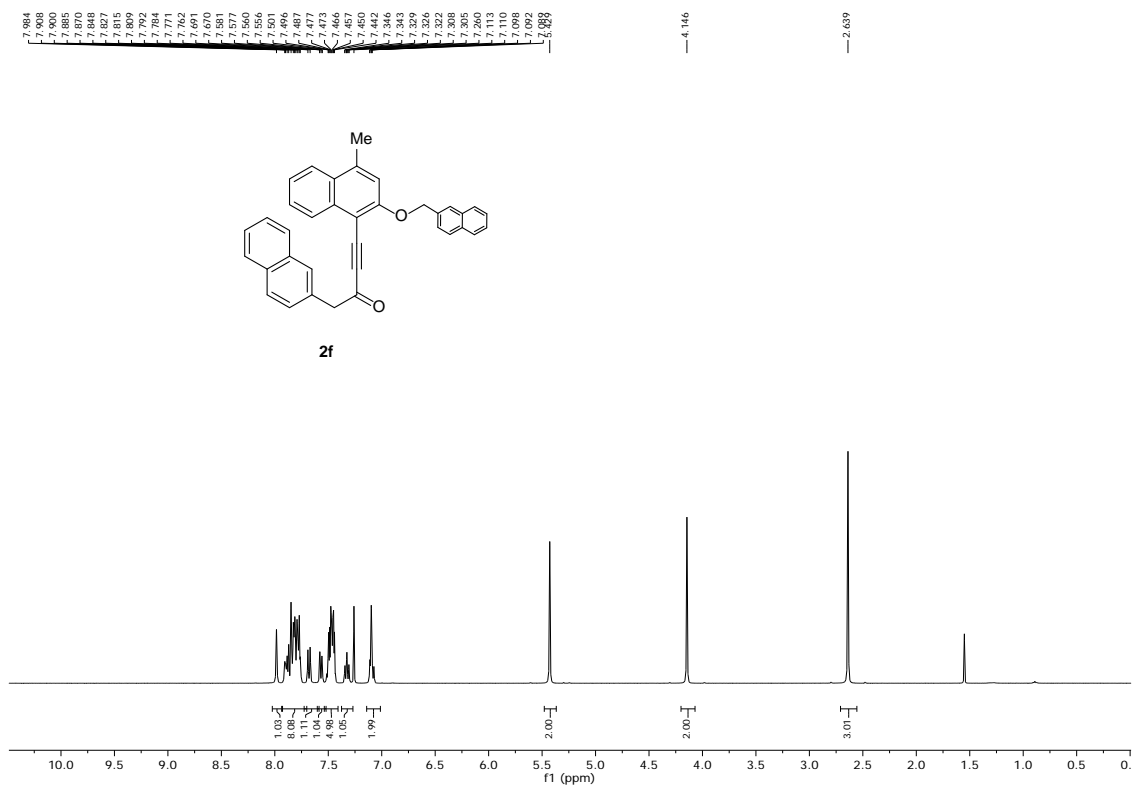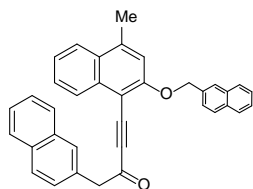

2f

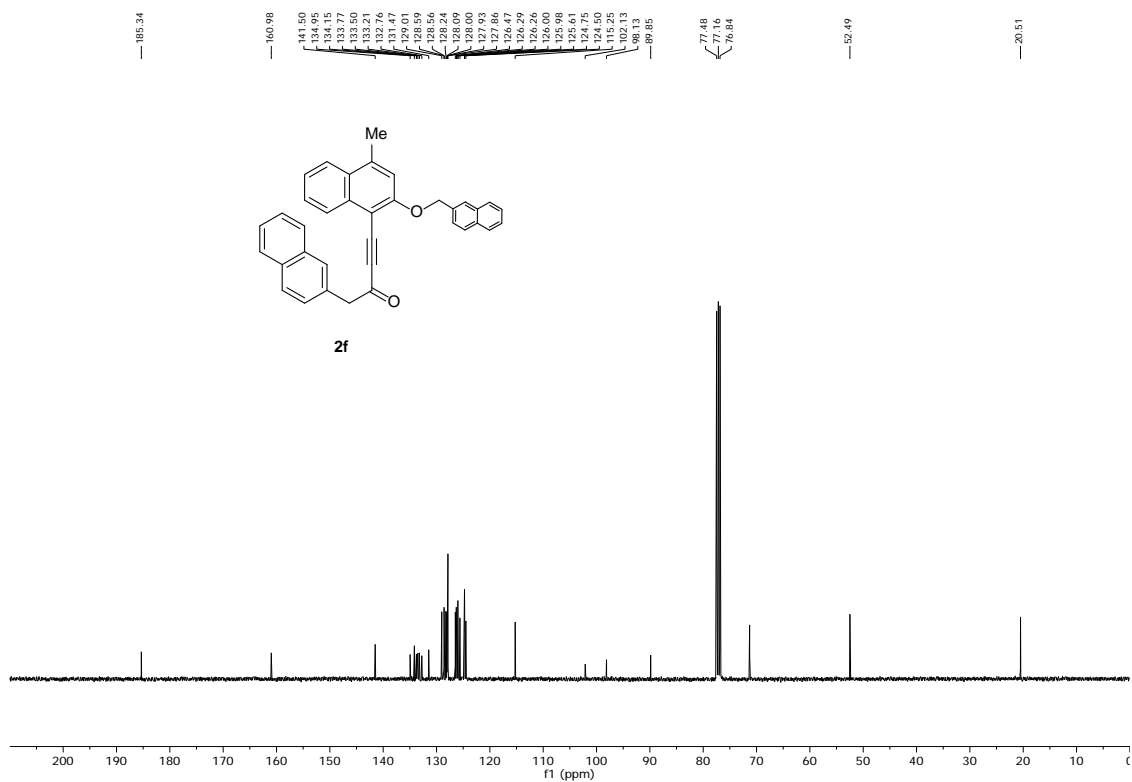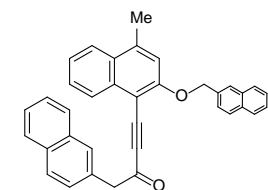

2f



# Compound 2h

8.523  
8.520  
7.949  
7.944  
7.890  
7.882  
7.841  
7.826  
7.817  
7.813  
7.798  
7.789  
7.782  
7.775  
7.754  
7.551  
7.545  
7.540  
7.535  
7.532  
7.528  
7.524  
7.519  
7.516  
7.504  
7.499  
7.490  
7.480  
7.466  
7.458  
7.450  
7.447  
7.442  
7.307  
7.283  
7.260  
6.884  
6.881  
6.813  
6.794  
6.442  
-4.147

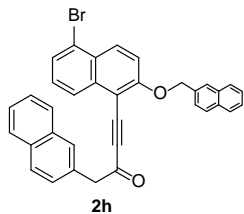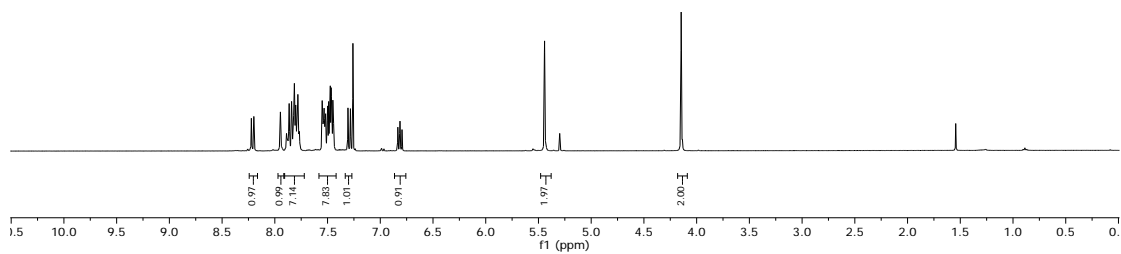

185.28  
161.48  
156.19  
133.76  
133.71  
133.44  
133.25  
132.99  
132.59  
131.26  
129.09  
128.89  
128.72  
128.72  
128.48  
128.20  
128.04  
127.93  
127.89  
127.89  
126.67  
126.67  
126.40  
126.39  
126.12  
126.05  
124.93  
124.63  
123.16  
115.10  
104.26  
98.14  
88.32  
77.48  
77.16  
76.84  
71.34  
52.50

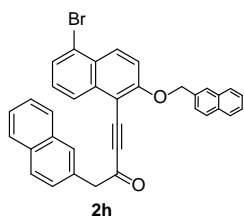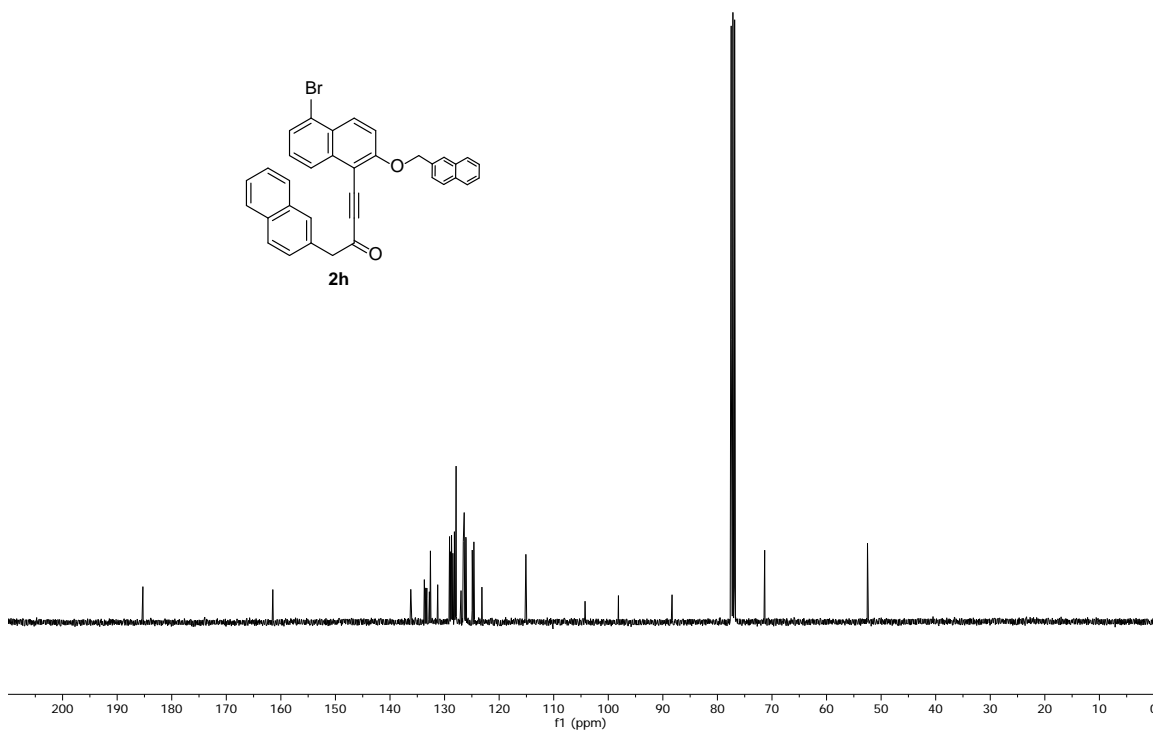



# Compound 2j

7.944  
7.940  
7.873  
7.850  
7.830  
7.815  
7.805  
7.802  
7.791  
7.684  
7.664  
7.663  
7.660  
7.553  
7.548  
7.527  
7.507  
7.502  
7.493  
7.486  
7.479  
7.470  
7.465  
7.462  
7.455  
7.450  
7.434  
7.425  
7.421  
7.416  
7.410  
7.407  
7.395  
7.369  
7.364  
7.355  
7.349  
7.345  
7.260  
7.239  
7.236  
7.219  
7.219  
7.148  
7.125  
7.108  
7.087  
5.883

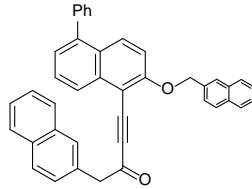

2j

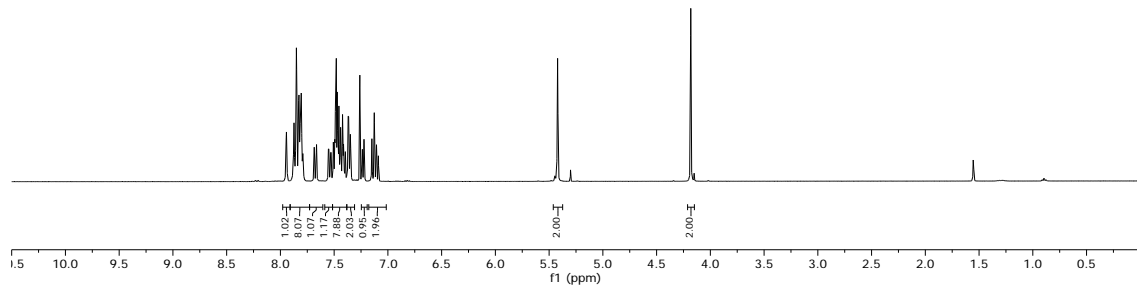

165.39  
161.04  
140.99  
135.40  
134.02  
133.79  
133.79  
133.51  
133.51  
132.79  
131.83  
131.38  
130.88  
129.65  
128.65  
128.65  
128.41  
128.19  
128.19  
128.06  
127.89  
127.89  
127.86  
127.82  
127.60  
126.49  
126.49  
126.35  
126.29  
126.06  
125.96  
125.96  
124.68  
124.55  
113.93  
104.01  
89.36  
89.36  
77.48  
77.48  
76.84  
76.84  
71.24  
71.24  
52.37

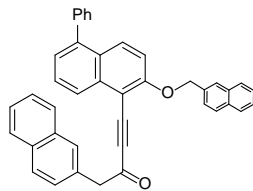

2j

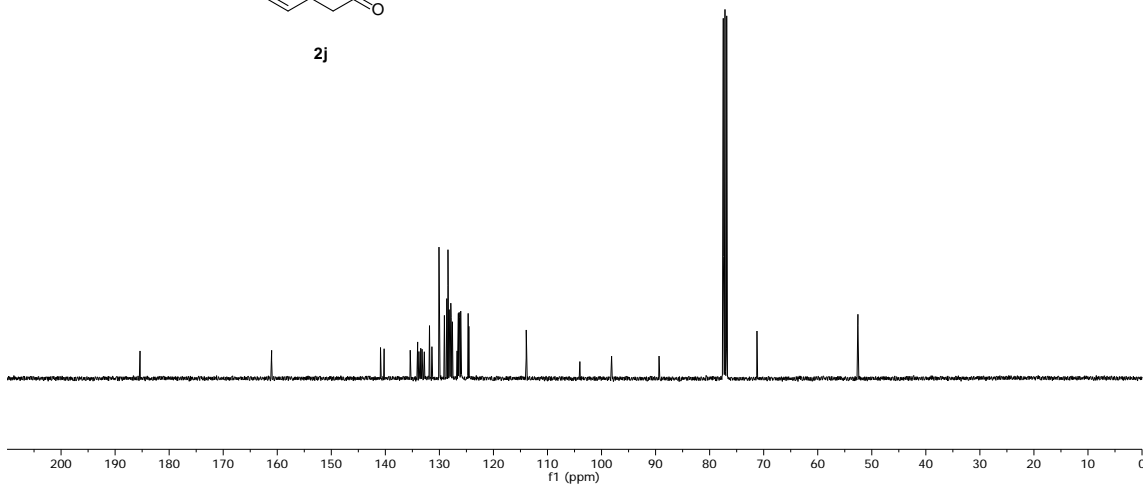

# Compound 2k

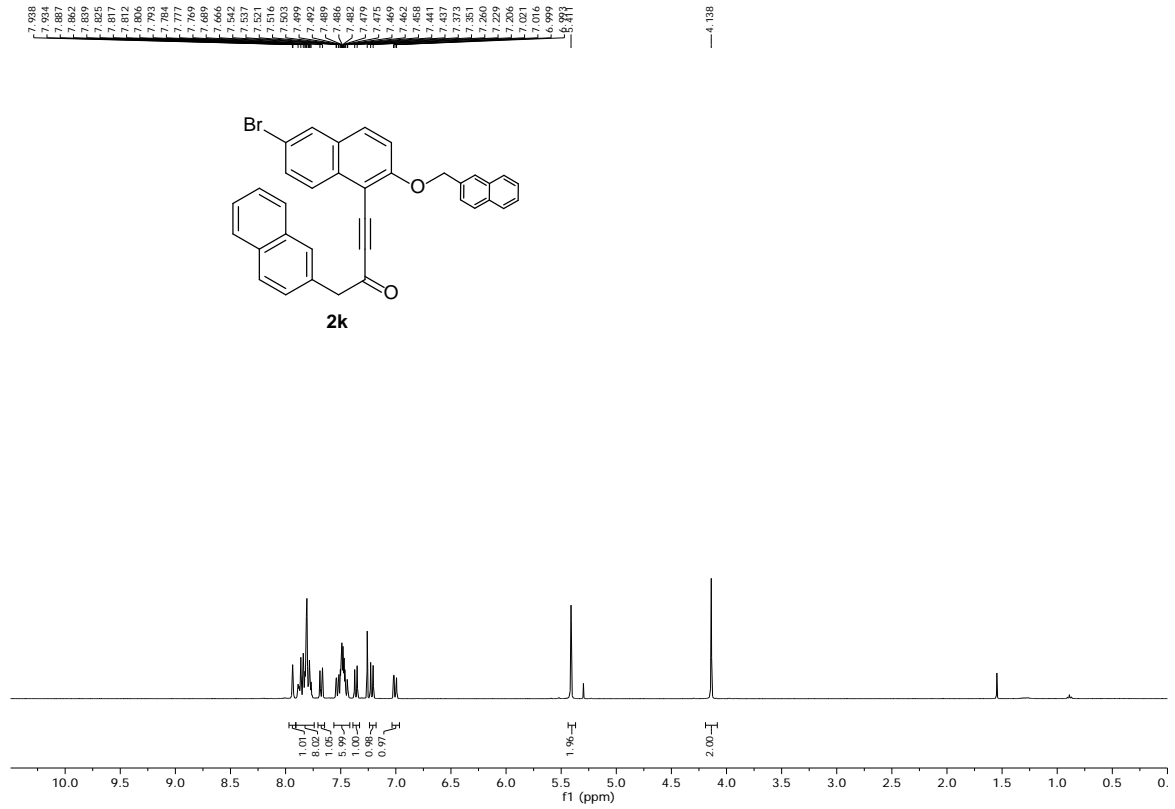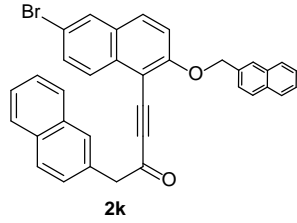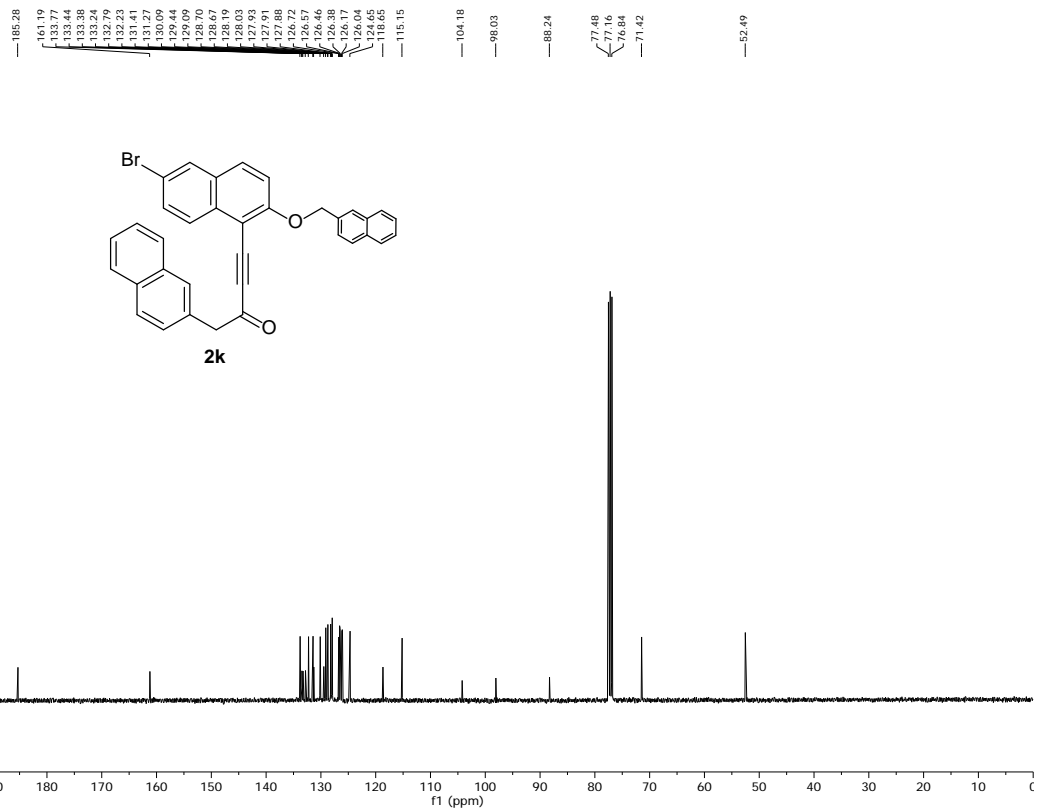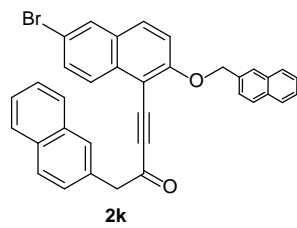



# Compound 21

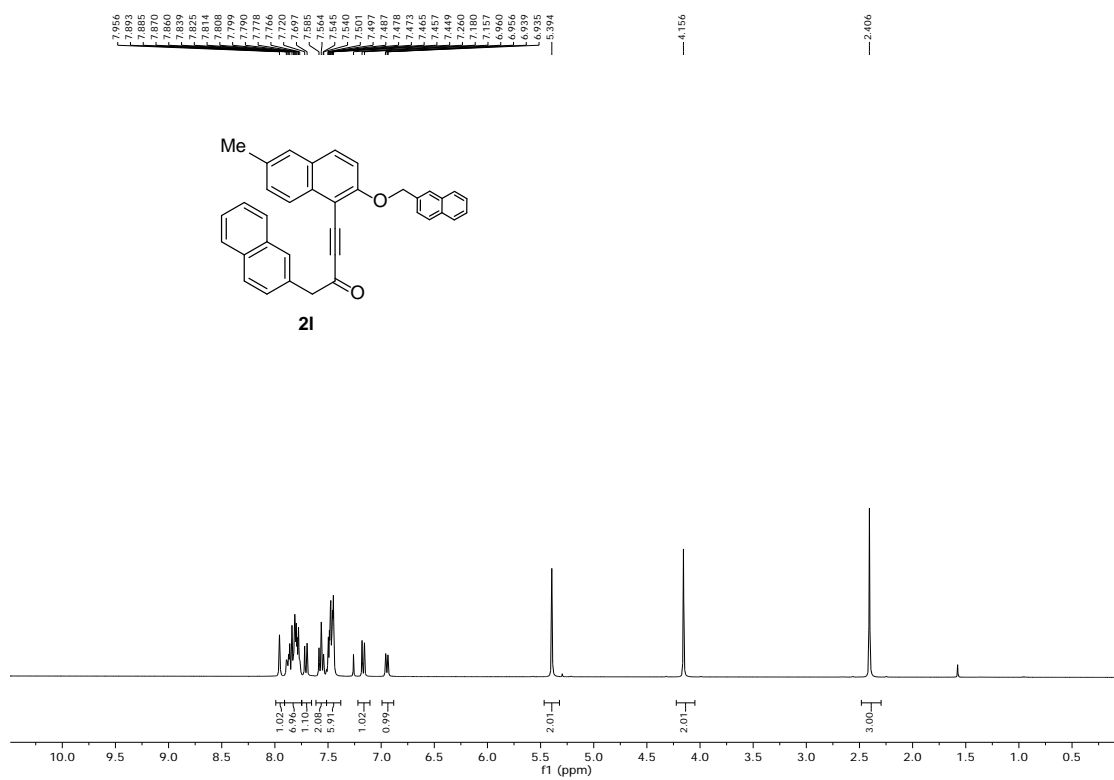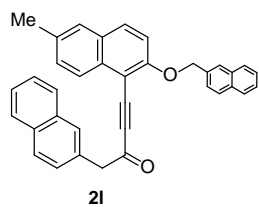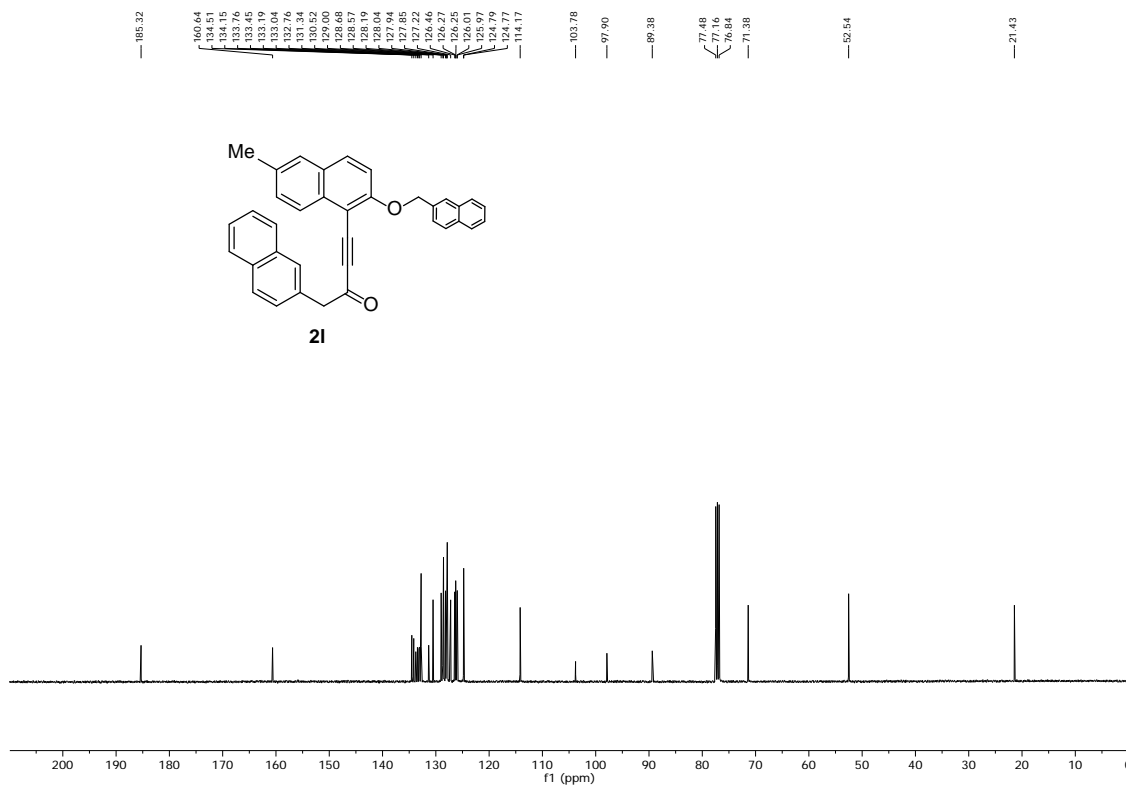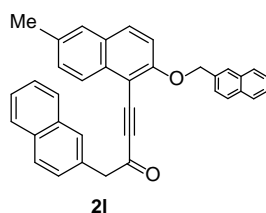

# Compound 2m

7.984  
7.982  
7.980  
7.902  
7.898  
7.892  
7.889  
7.886  
7.878  
7.876  
7.874  
7.864  
7.863  
7.860  
7.859  
7.852  
7.846  
7.841  
7.837  
7.835  
7.830  
7.828  
7.825  
7.823  
7.824  
7.822  
7.817  
7.816  
7.814  
7.811  
7.810  
7.654  
7.653  
7.652  
7.640  
7.639  
7.638  
7.625  
7.623  
7.621  
7.620  
7.618  
7.615  
7.613  
7.609  
7.608  
7.592  
7.589  
7.577  
7.576  
7.518  
7.509  
7.506  
7.505  
7.499  
7.496  
7.490  
7.492  
7.491  
7.489  
7.485  
7.483  
7.479  
7.477  
7.475  
7.473  
7.470  
7.400  
7.396  
7.388  
7.385  
7.384  
7.375  
7.373  
7.313  
7.310  
7.299  
7.295  
7.276  
7.260  
7.256  
4.178  
4.177

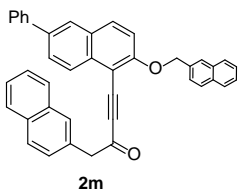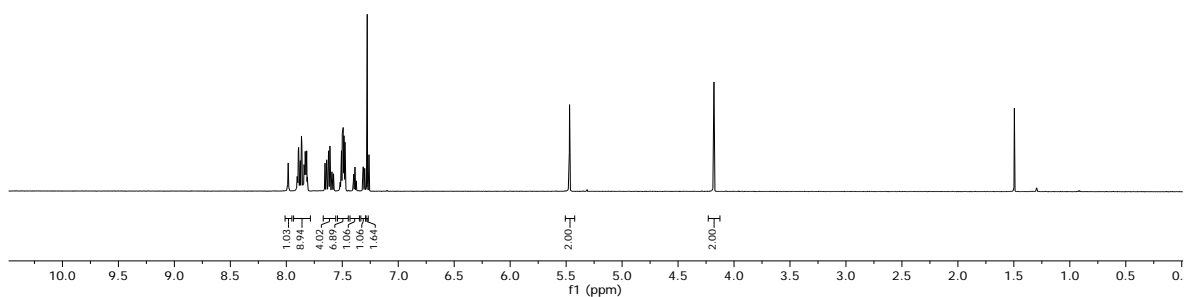

185.16  
161.30  
140.69  
134.54  
134.29  
134.17  
133.99  
133.64  
133.56  
133.42  
133.00  
131.18  
130.15  
129.04  
128.97  
128.71  
128.70  
128.28  
128.15  
128.09  
127.93  
127.91  
127.91  
127.62  
127.37  
126.54  
126.38  
126.35  
126.35  
126.09  
125.98  
125.64  
124.89  
114.99  
104.34  
98.09  
89.04  
77.37  
77.14  
76.95  
71.83  
52.61

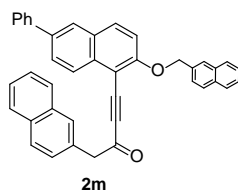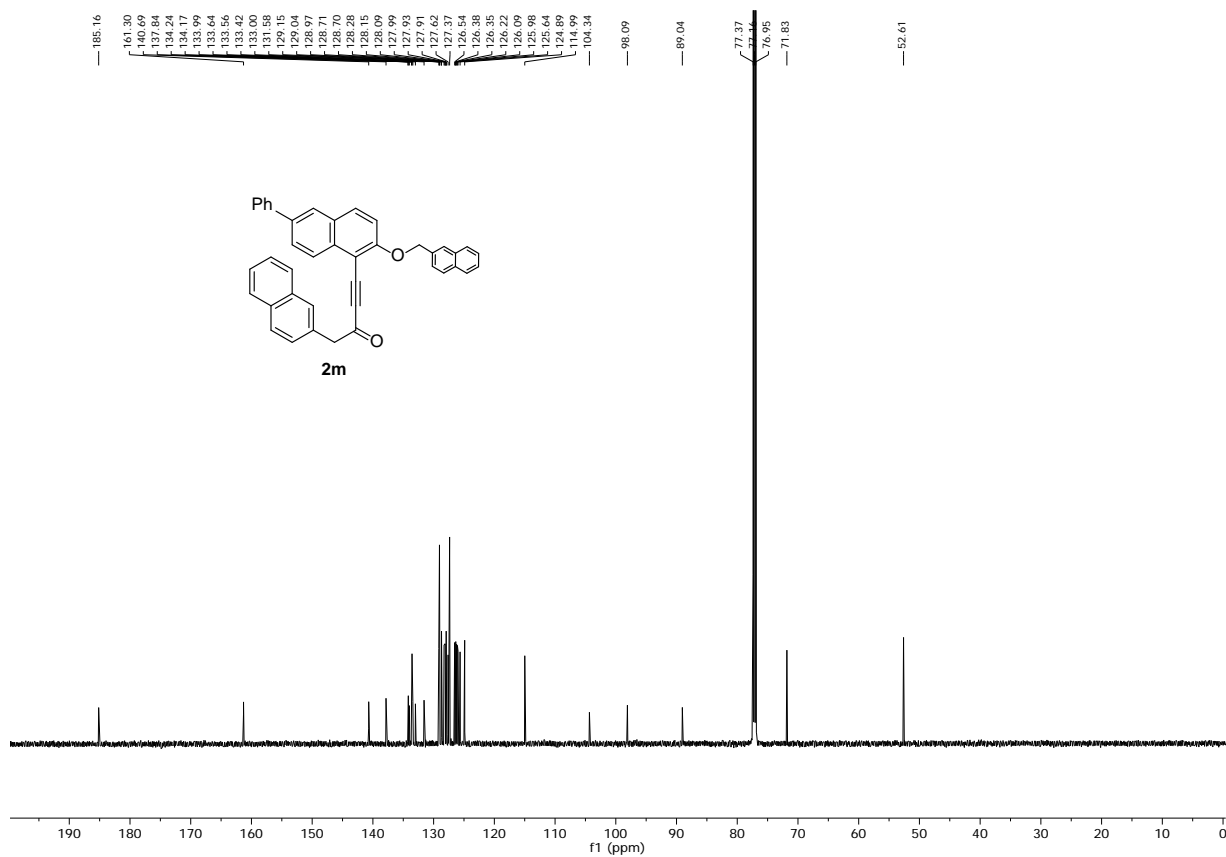

# Compound 2n

7.940  
7.916  
7.875  
7.855  
7.852  
7.842  
7.829  
7.819  
7.795  
7.785  
7.775  
7.704  
7.663  
7.642  
7.622  
7.587  
7.561  
7.558  
7.554  
7.549  
7.533  
7.533  
7.507  
7.504  
7.491  
7.488  
7.481  
7.477  
7.474  
7.471  
7.466  
7.463  
7.457  
7.455  
7.450  
7.357  
7.343  
7.340  
7.335  
7.332  
7.319  
7.263  
7.260  
7.249  
7.248  
7.241  
7.227  
7.224  
7.206  
7.199

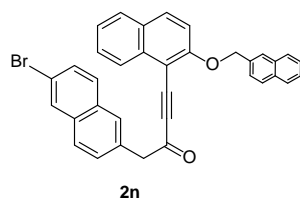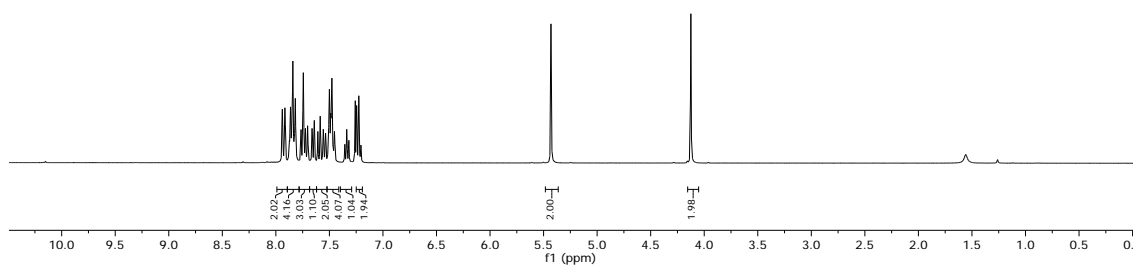

184.88  
161.26  
134.90  
133.95  
133.76  
133.46  
133.44  
133.22  
132.10  
131.86  
129.86  
129.86  
129.54  
129.11  
128.92  
128.66  
128.66  
128.64  
128.36  
128.30  
128.17  
127.89  
127.63  
127.63  
126.36  
126.36  
126.03  
124.97  
124.89  
124.81  
119.84  
114.09  
103.79  
97.99  
89.30  
77.48  
77.16  
76.84  
71.37  
52.43

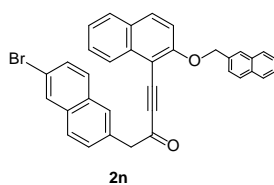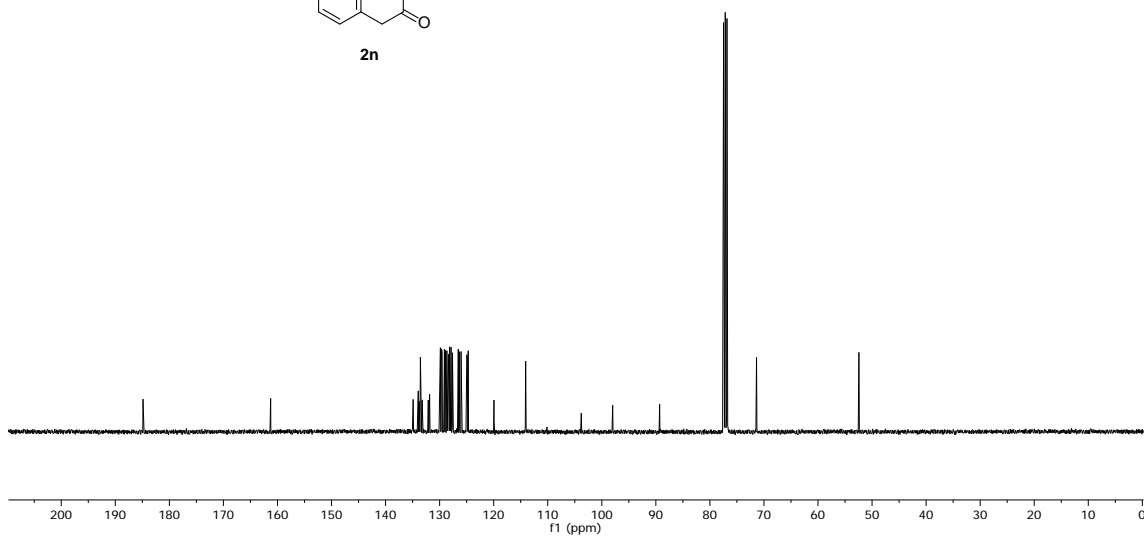

# Compound 2o

7.936  
7.881  
7.871  
7.871  
7.857  
7.839  
7.835  
7.829  
7.823  
7.815  
7.810  
7.787  
7.775  
7.773  
7.760  
7.700  
7.688  
7.678  
7.673  
7.655  
7.655  
7.547  
7.531  
7.526  
7.498  
7.498  
7.485  
7.475  
7.471  
7.445  
7.445  
7.420  
7.420  
7.324  
7.321  
7.304  
7.304  
7.300  
7.292  
7.287  
7.287  
7.283  
7.266  
7.266  
7.219  
7.197  
7.164  
7.164  
7.147  
7.147  
7.143  
7.139  
7.126  
7.117  
2.482

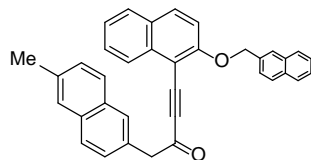

**2o**

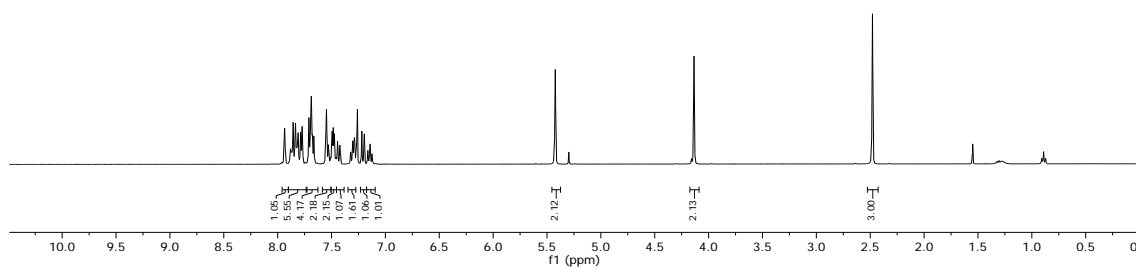

185.50  
151.17  
135.65  
134.92  
134.05  
133.45  
133.20  
133.20  
132.99  
132.02  
130.35  
130.35  
128.61  
128.58  
128.46  
128.25  
128.20  
128.00  
127.95  
127.86  
127.71  
126.82  
126.82  
126.27  
125.96  
125.01  
124.88  
124.81  
114.18  
103.98  
98.06  
88.96  
77.48  
77.16  
76.84  
71.36  
52.54  
21.82

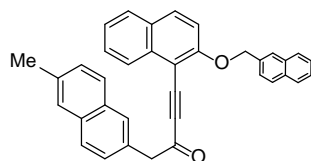

**2o**

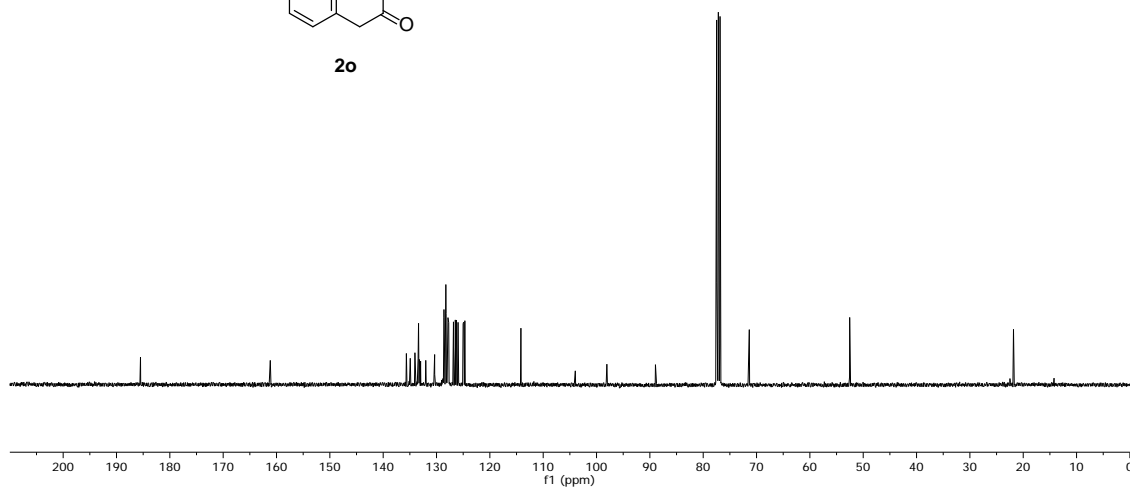

# Compound 2p

7.975  
7.963  
7.943  
7.880  
7.873  
7.870  
7.863  
7.853  
7.839  
7.831  
7.824  
7.816  
7.806  
7.793  
7.727  
7.723  
7.717  
7.711  
7.706  
7.701  
7.696  
7.689  
7.683  
7.679  
7.675  
7.668  
7.665  
7.660  
7.656  
7.647  
7.530  
7.526  
7.508  
7.499  
7.492  
7.487  
7.481  
7.476  
7.469  
7.465  
7.461  
7.456  
7.453  
7.448  
7.442  
7.402  
7.398  
7.388  
7.383  
7.378  
7.365  
7.310  
7.307  
7.293  
7.286  
7.286  
7.286  
7.273  
7.269  
7.260  
7.259  
7.259  
7.252  
7.172  
7.168  
7.155  
7.151  
7.134  
7.130  
5.425  
4.169

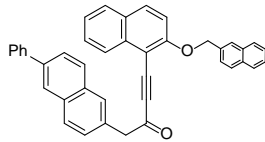

2p

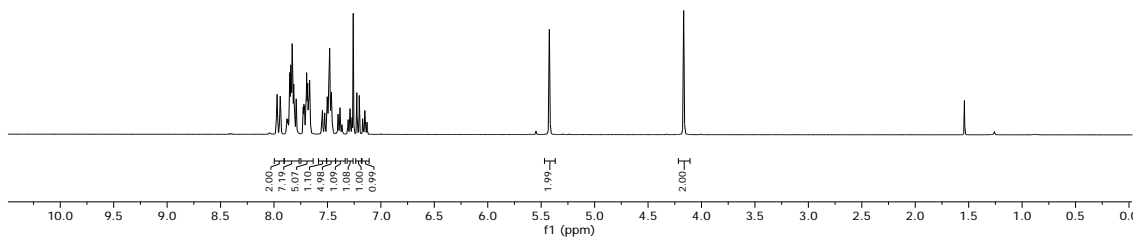

185.31  
161.21  
159.16  
158.17  
134.92  
134.05  
133.46  
133.44  
133.22  
133.22  
132.94  
131.47  
128.99  
128.91  
128.81  
128.65  
128.53  
128.47  
128.45  
128.28  
128.19  
127.88  
127.77  
127.52  
127.50  
126.51  
126.30  
126.06  
125.98  
125.98  
124.98  
124.91  
124.70  
114.16  
103.93  
98.06  
89.17  
77.48  
76.84  
71.36  
52.57

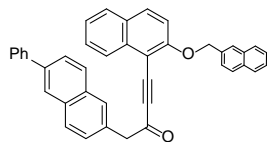

2p

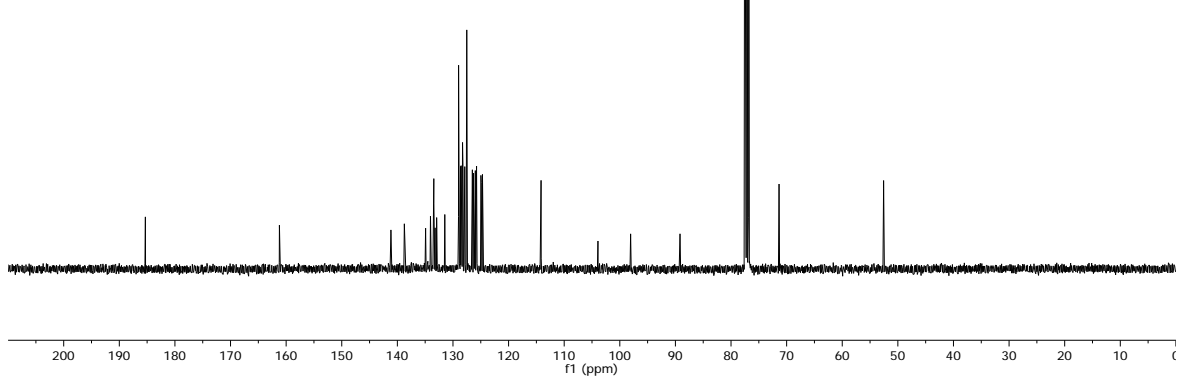

# Compound 2q

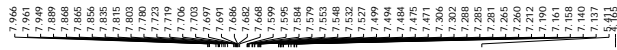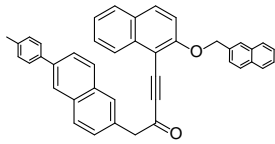

2q

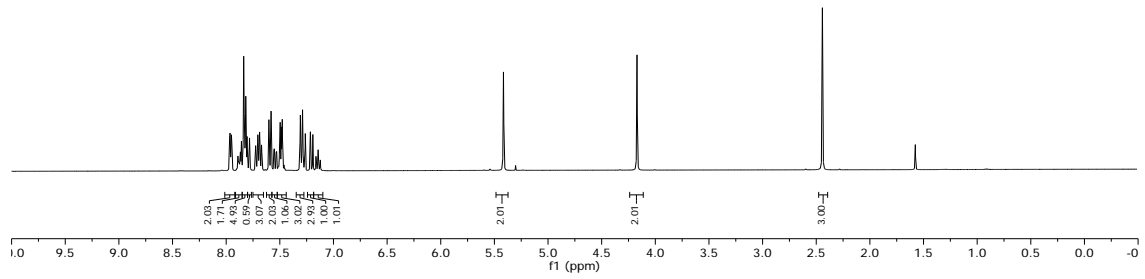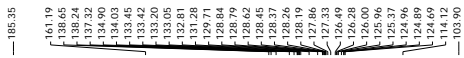

2q

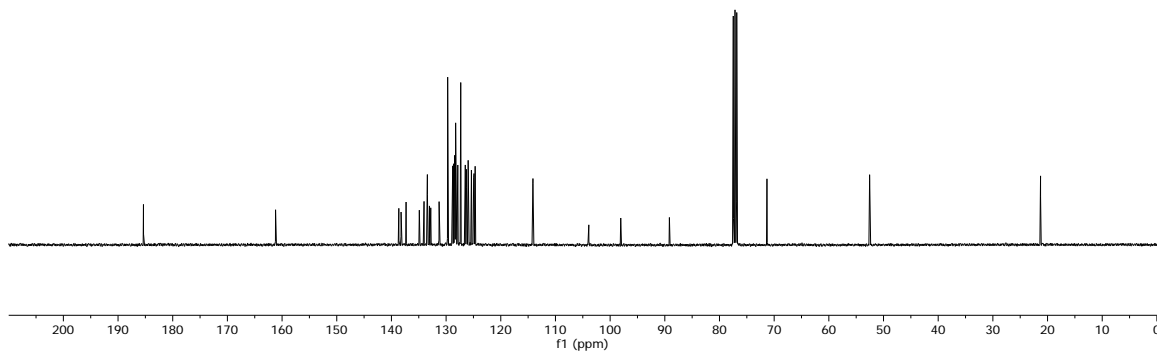

# Compound 2r

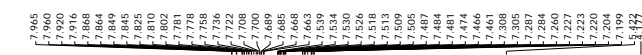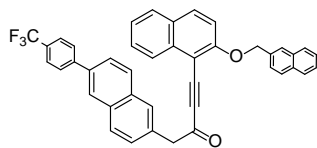

2r

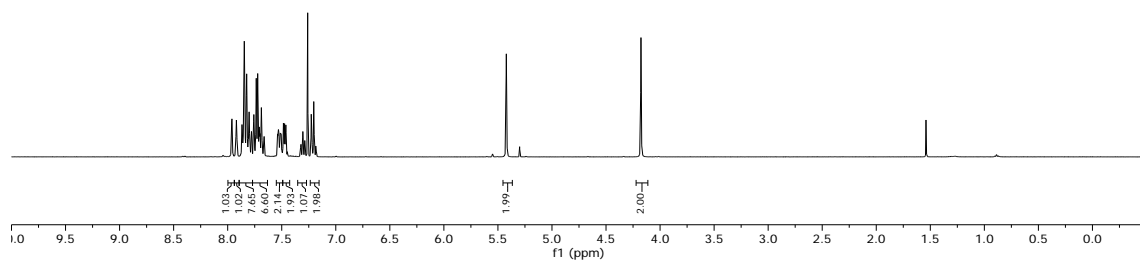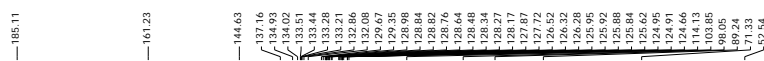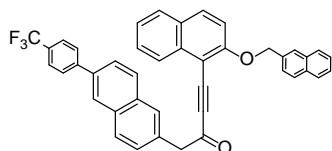

2r

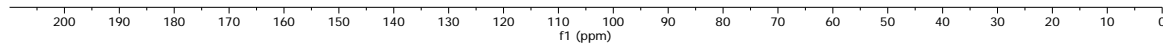

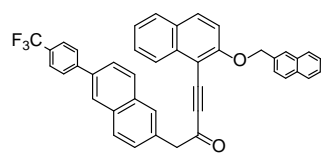

**2r**

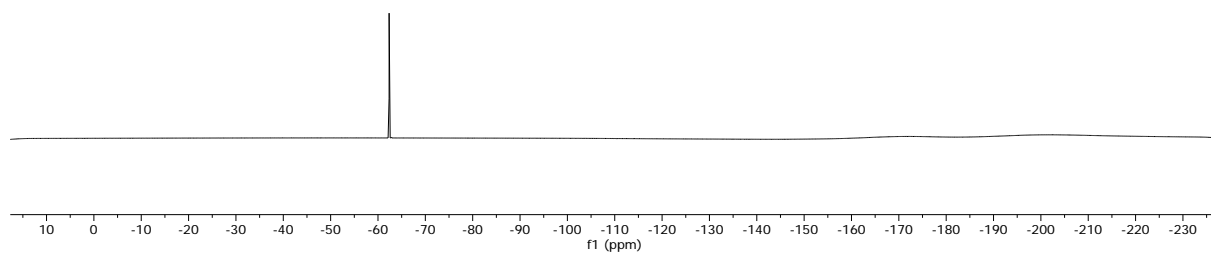



# Compound 2s

7.940  
7.915  
7.880  
7.871  
7.857  
7.850  
7.829  
7.823  
7.807  
7.802  
7.785  
7.773  
7.713  
7.692  
7.688  
7.671  
7.671  
7.622  
7.617  
7.605  
7.600  
7.585  
7.543  
7.526  
7.522  
7.492  
7.488  
7.475  
7.471  
7.468  
7.465  
7.465  
7.290  
7.286  
7.285  
7.269  
7.269  
7.266  
7.260  
7.217  
7.170  
7.166  
7.152  
7.149  
7.145  
7.145  
7.021  
7.010  
7.004  
5.416  
3.879

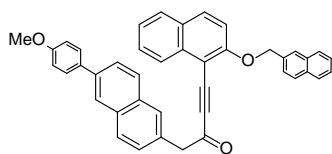

2s

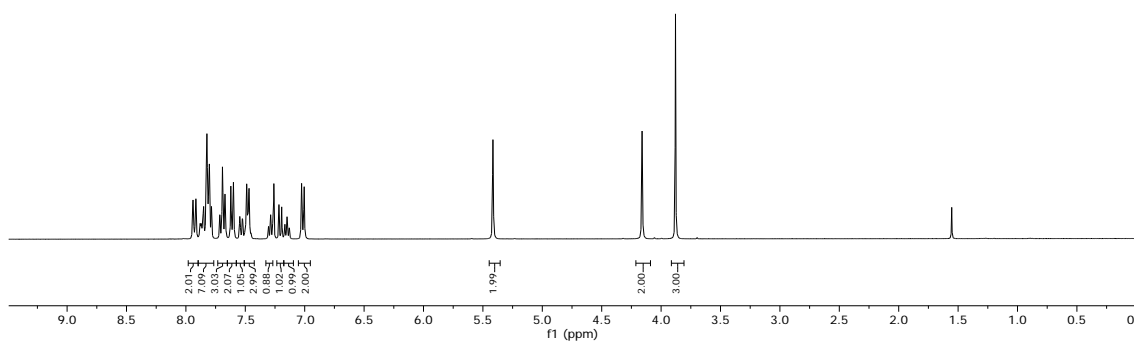

185.37  
184.20  
159.20  
138.33  
134.92  
134.05  
133.65  
133.42  
133.21  
133.21  
133.09  
132.63  
131.15  
128.76  
128.76  
128.63  
128.51  
128.47  
128.37  
128.37  
128.19  
127.87  
126.50  
126.29  
125.96  
125.86  
124.98  
124.98  
124.90  
124.69  
114.45  
114.15  
103.93  
98.06  
89.14  
77.48  
77.16  
76.84  
71.34  
55.54  
52.55

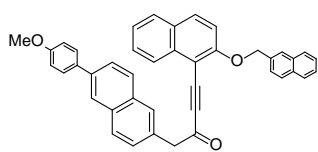

2s

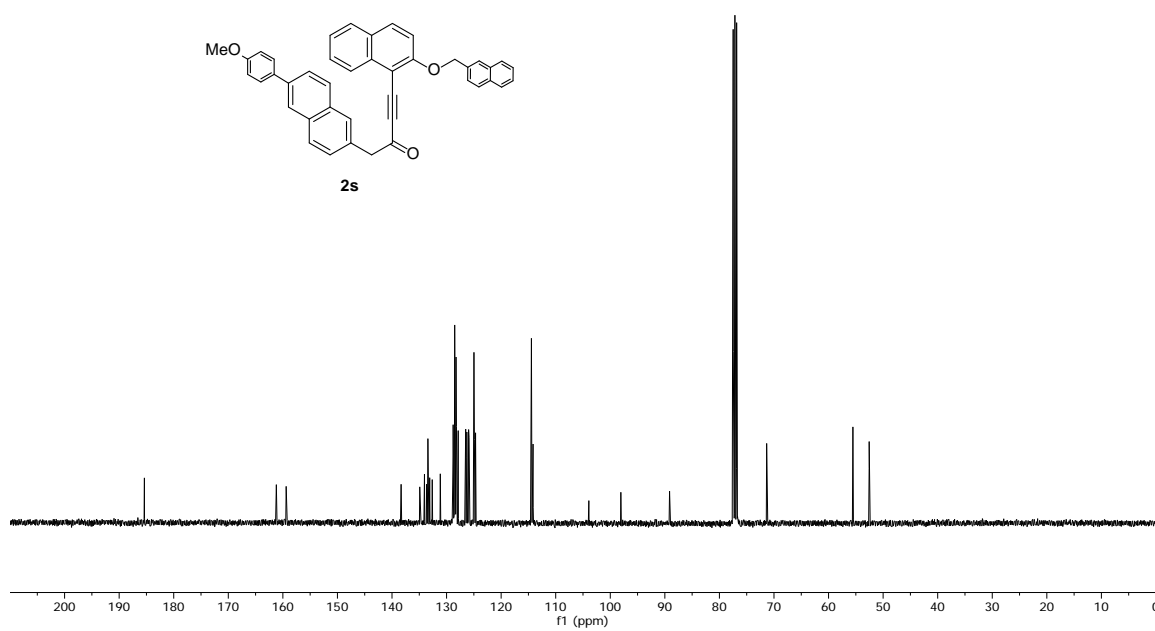

# Compound 2t

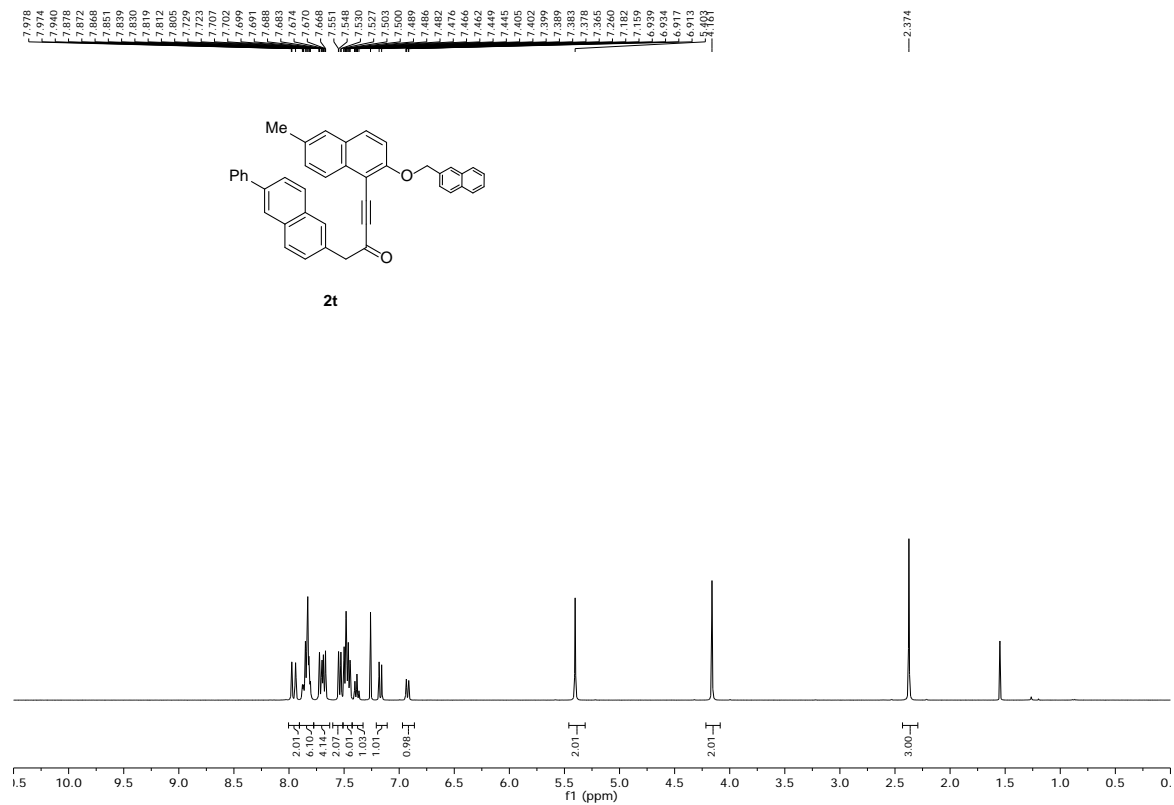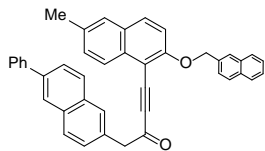

2t

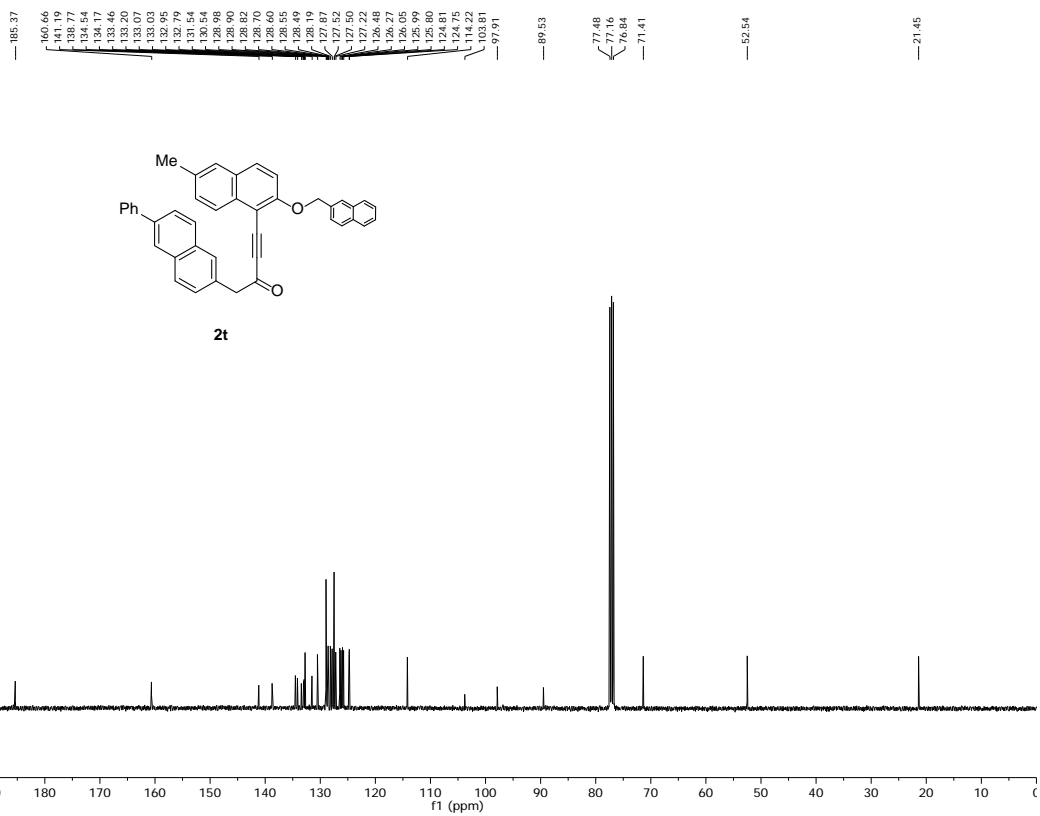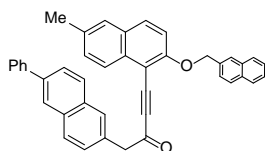

2t

# Compound 2u

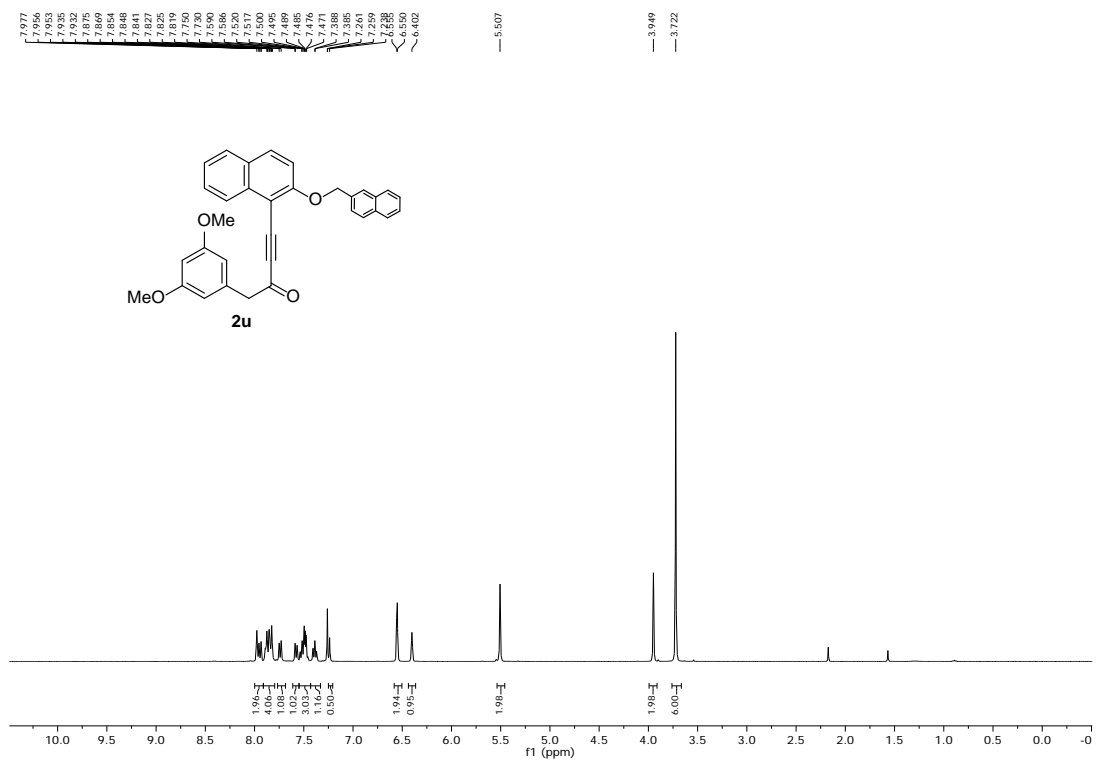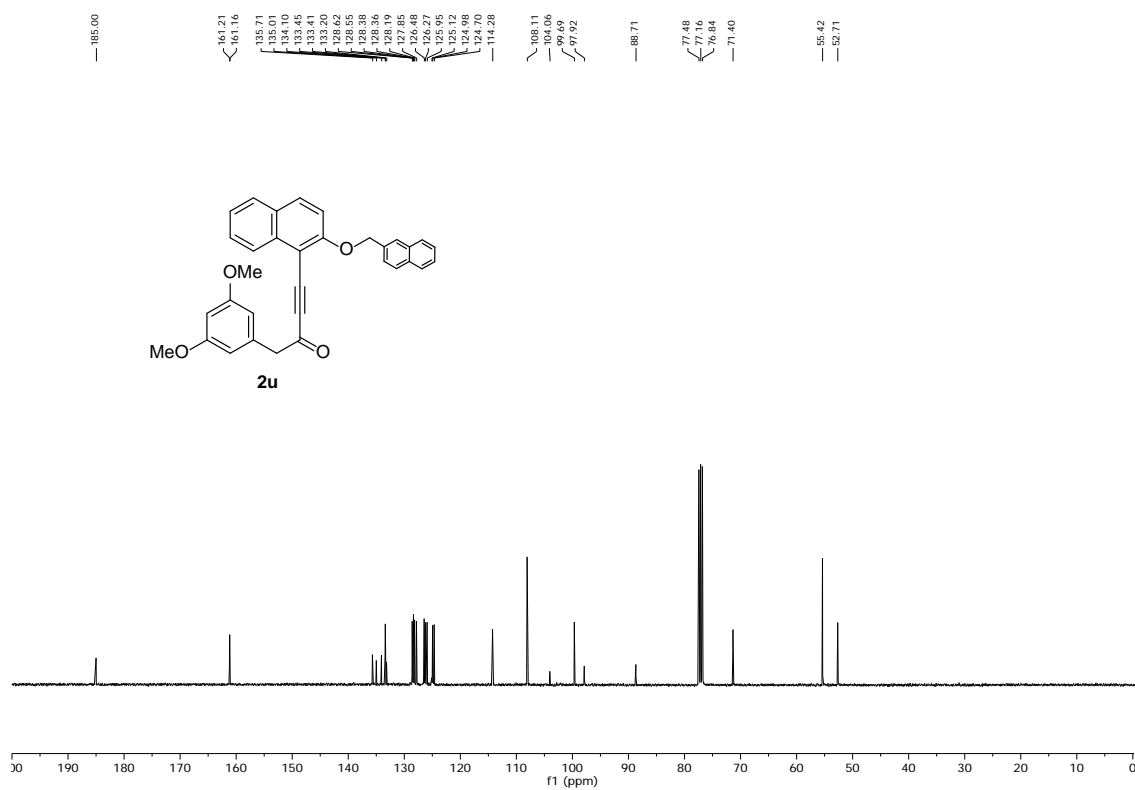

# Compound 4a

7.977  
7.955  
7.899  
7.878  
7.772  
7.754  
7.714  
7.694  
7.591  
7.581  
7.521  
7.504  
7.469  
7.446  
7.439  
7.419  
7.406  
7.398  
7.390  
7.381  
7.381  
7.309  
7.301  
7.292  
7.292  
7.240  
7.240  
7.249  
7.249  
6.940  
6.896  
6.876  
6.856

5.175  
5.144  
5.085  
5.085  
4.937

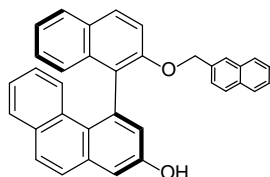

4a

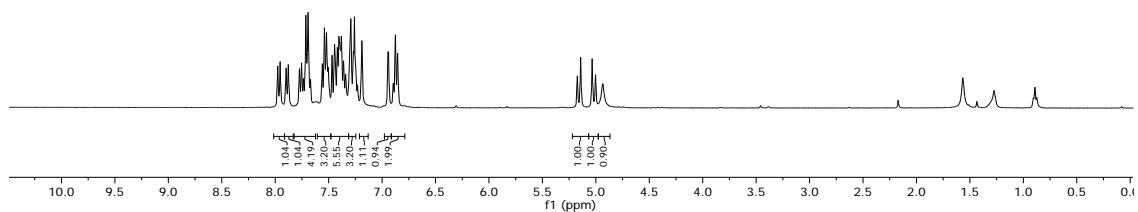

153.19  
152.48  
152.38  
152.49  
152.35  
153.35  
153.16  
152.87  
152.27  
151.32  
150.94  
149.62  
148.30  
148.03  
147.92  
147.64  
147.64  
146.93  
146.09  
146.02  
145.90  
145.84  
145.69  
145.54  
145.24  
144.95  
144.93  
144.33  
144.15  
144.15  
142.59

77.48  
77.16  
76.84  
71.30

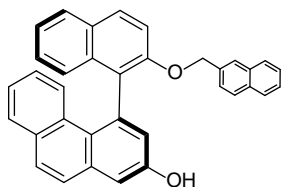

4a

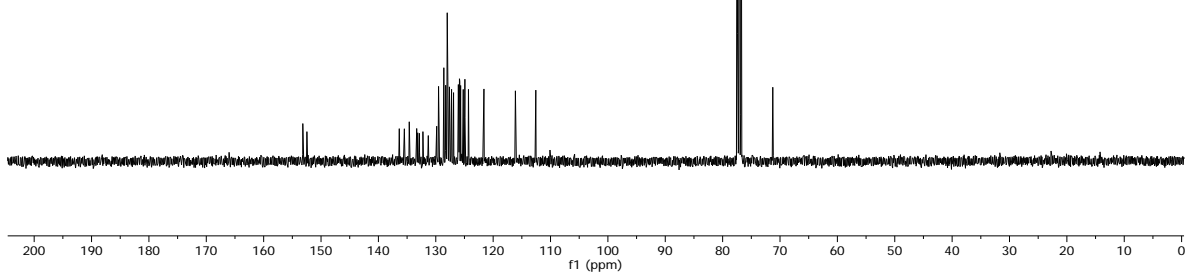

# Compound 4b

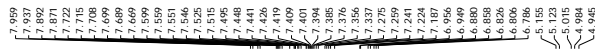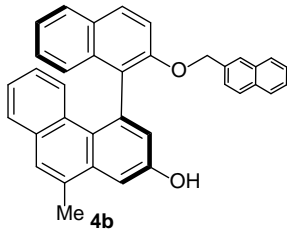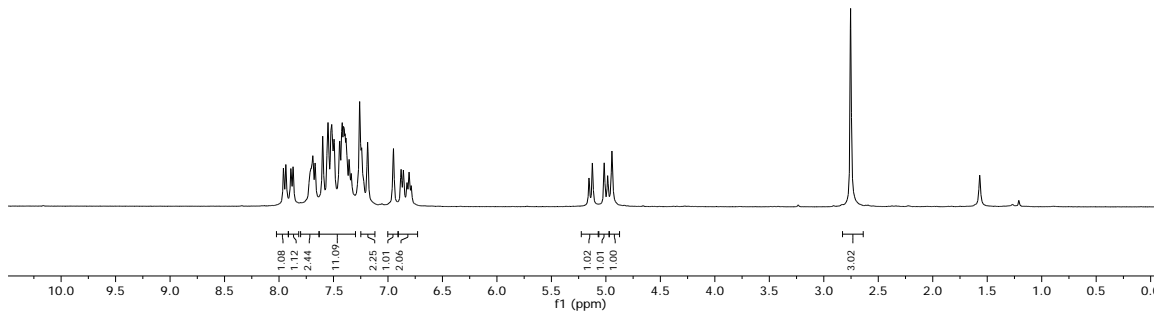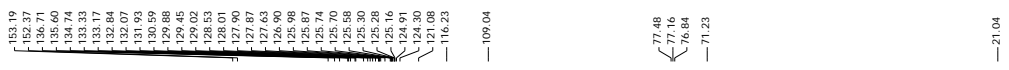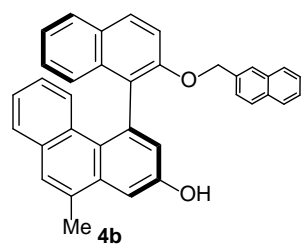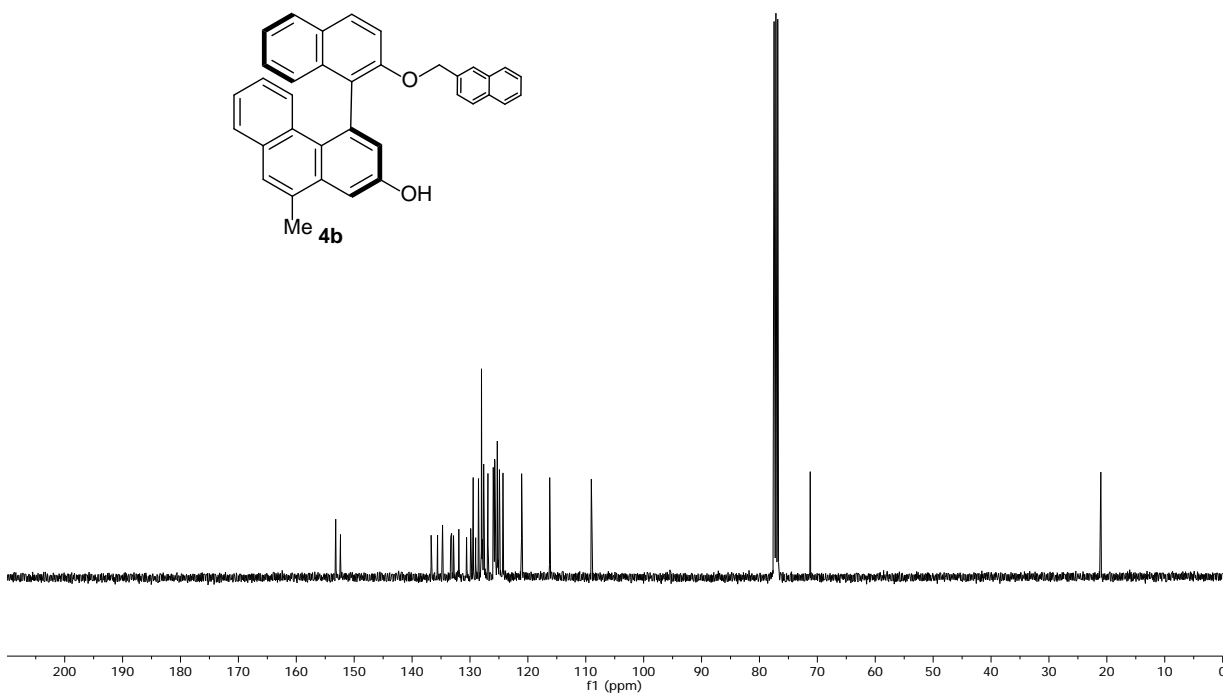

# Compound 4c

7.848, 7.827, 7.806, 7.790, 7.690, 7.686, 7.676, 7.662, 7.654, 7.651, 7.636, 7.623, 7.523, 7.513, 7.490, 7.467, 7.415, 7.412, 7.409, 7.395, 7.395, 7.391, 7.388, 7.383, 7.377, 7.374, 7.370, 7.366, 7.356, 7.350, 7.318, 7.315, 7.311, 7.308, 7.288, 7.268, 7.260, 7.257, 7.251, 7.248, 7.234, 7.231, 7.228, 7.225, 7.134, 7.131, 7.121, 7.117, 7.113, 7.110, 7.099, 7.096, 7.096, 6.926, 6.926, 6.923, 6.912, 6.908, 6.905, 6.901, 6.897, 6.887, 6.872, 6.868, 6.864, 6.861, 6.773, 6.769, 6.766, 6.748, 6.746, 6.746, 5.030, 5.002, 4.749, 4.733, 4.705, 4.701, 4.698

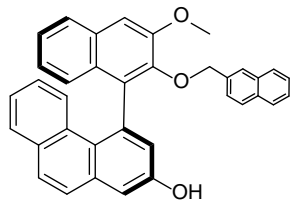

4c

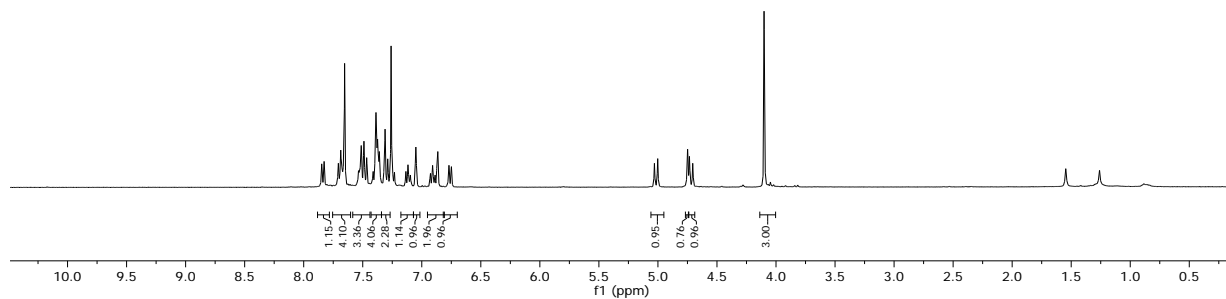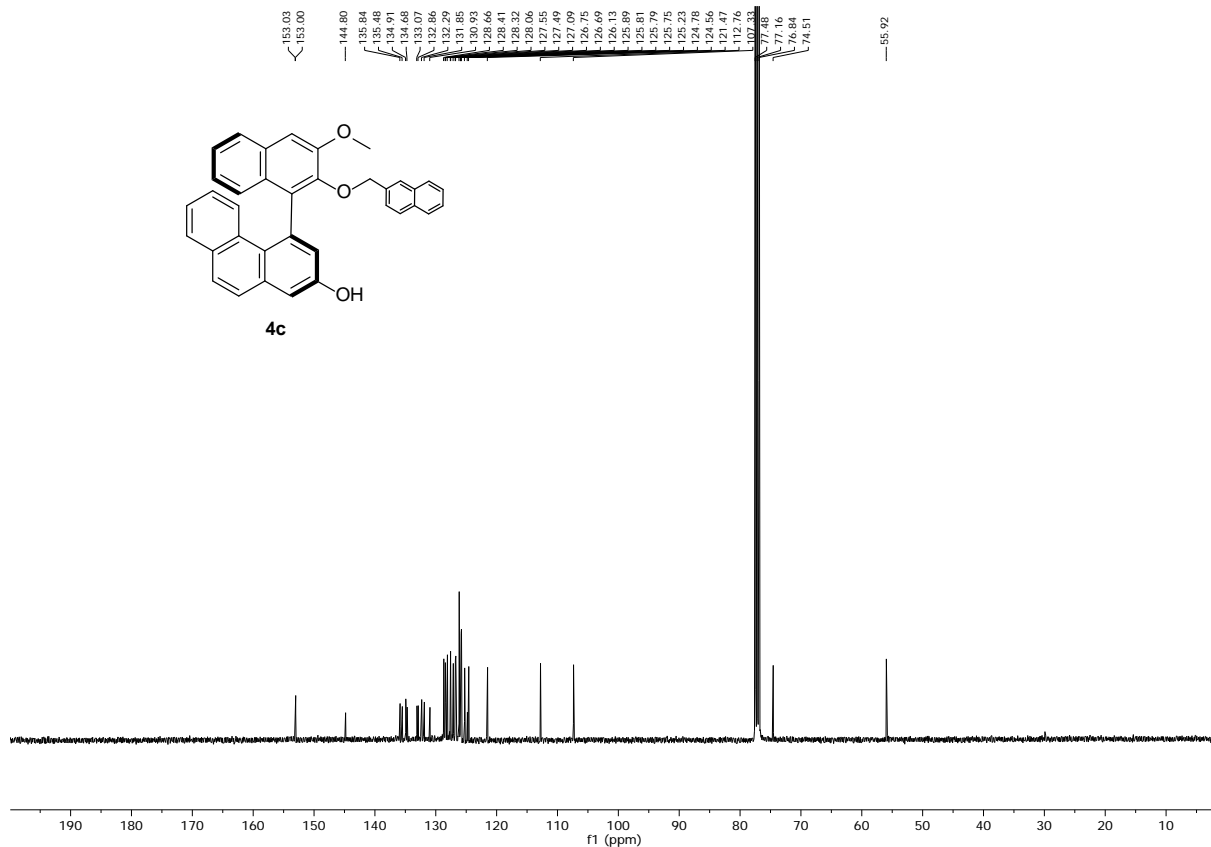

# Compound 4d

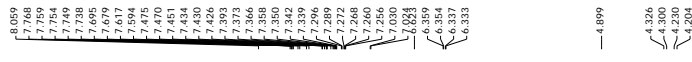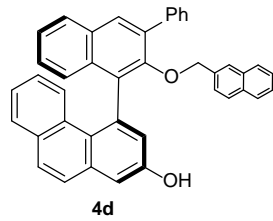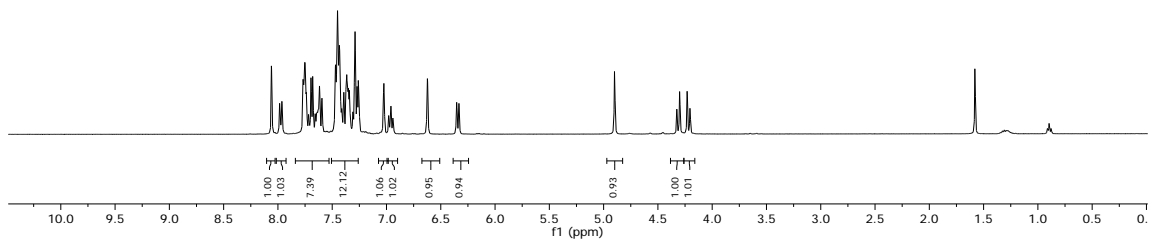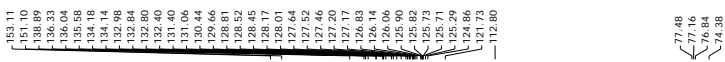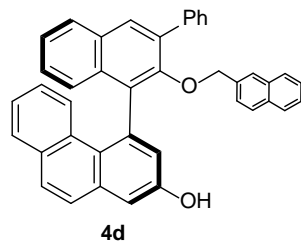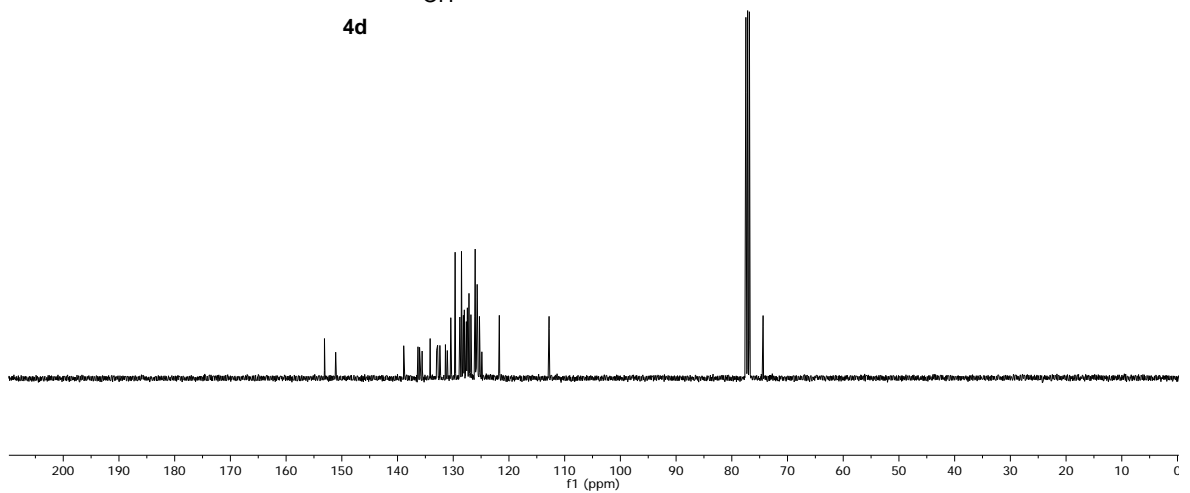





# Compound 4f

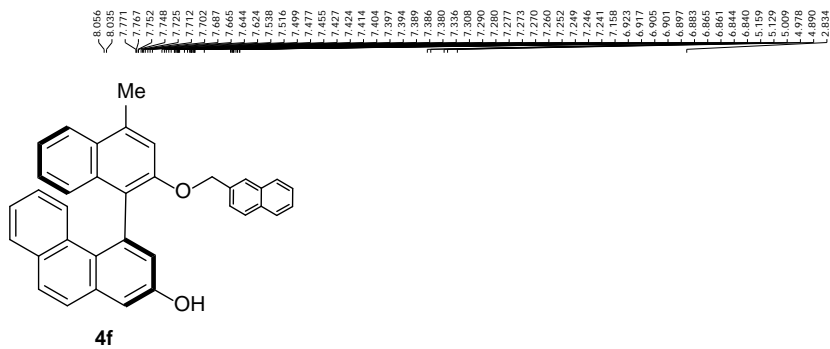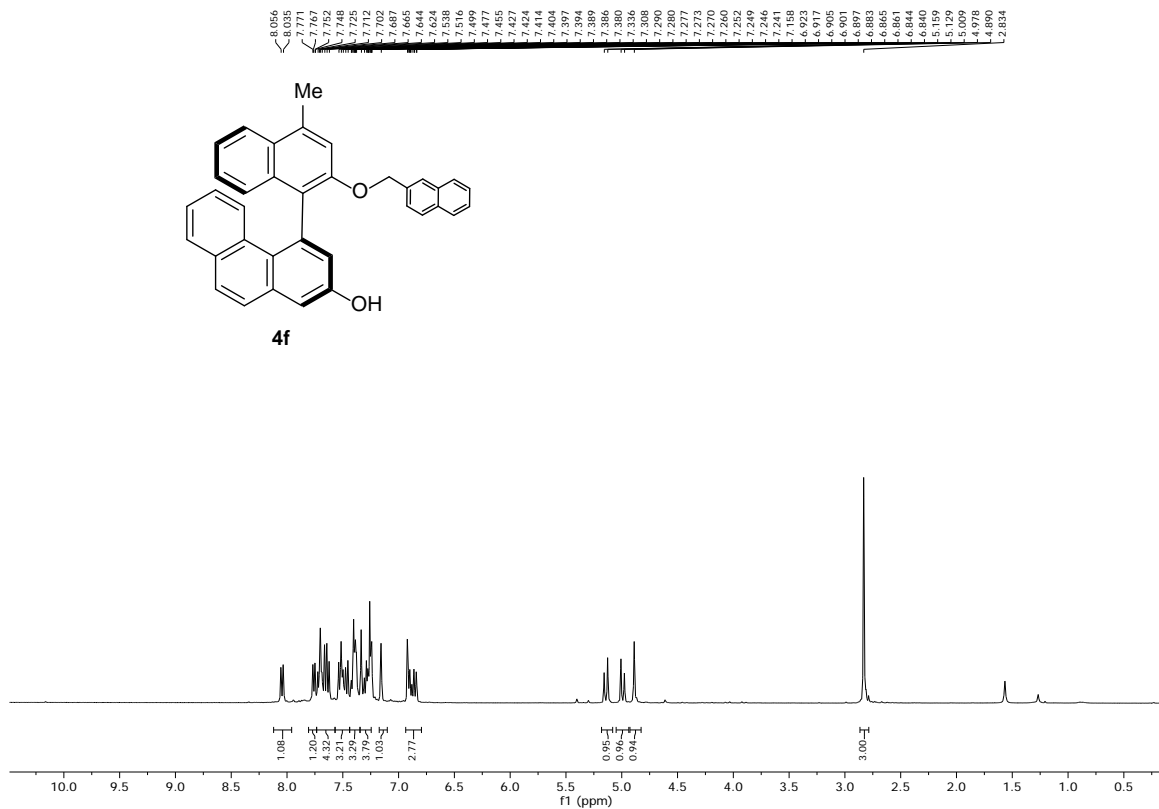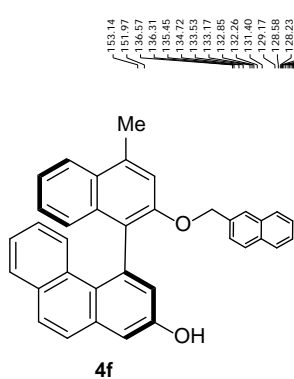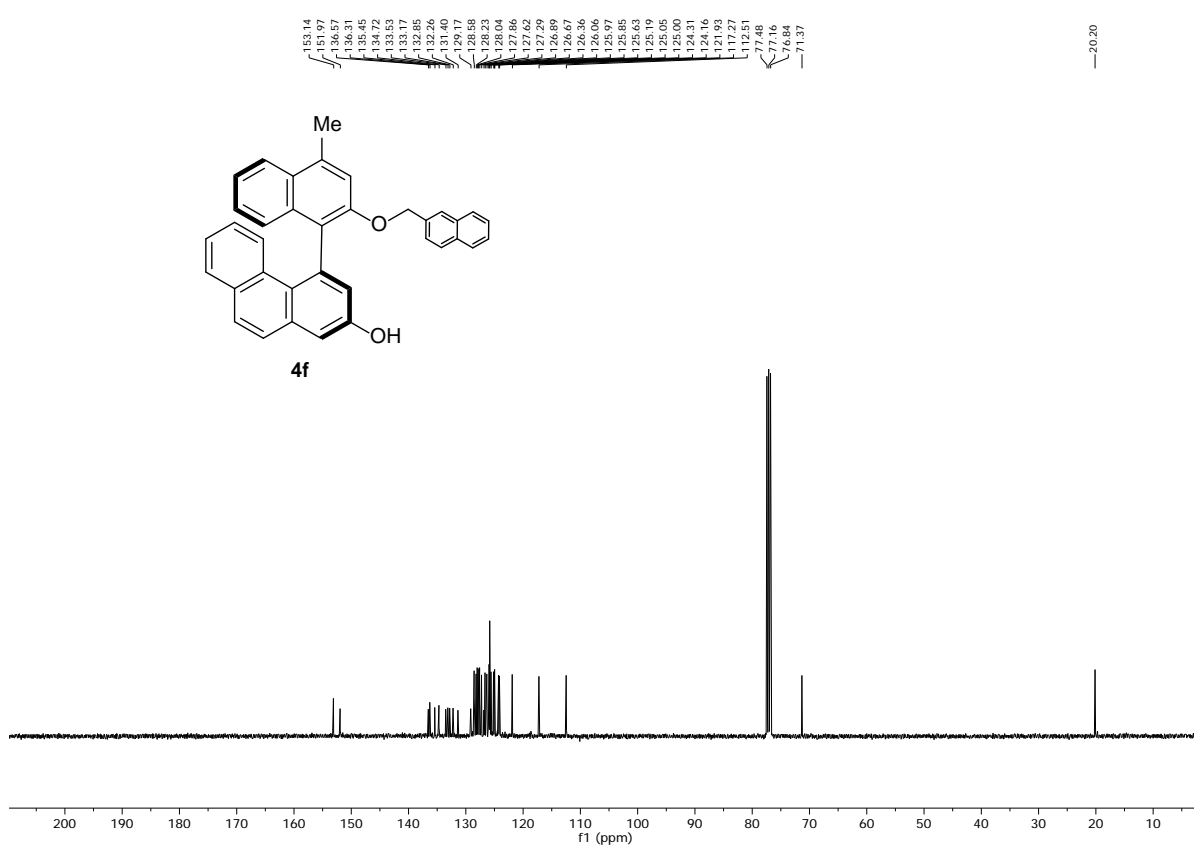



# Compound 4h

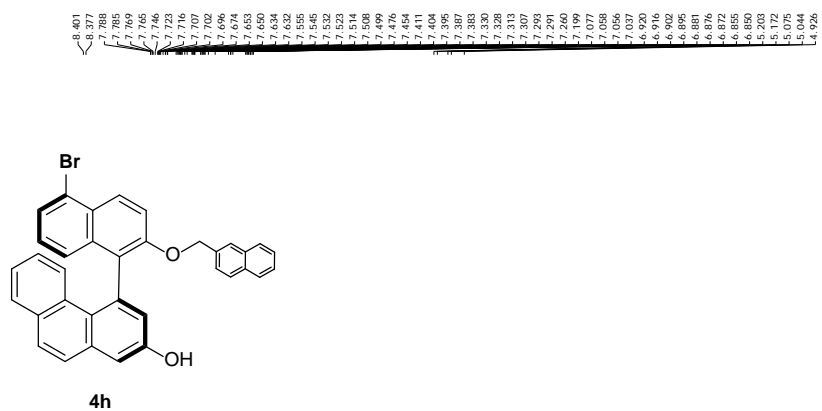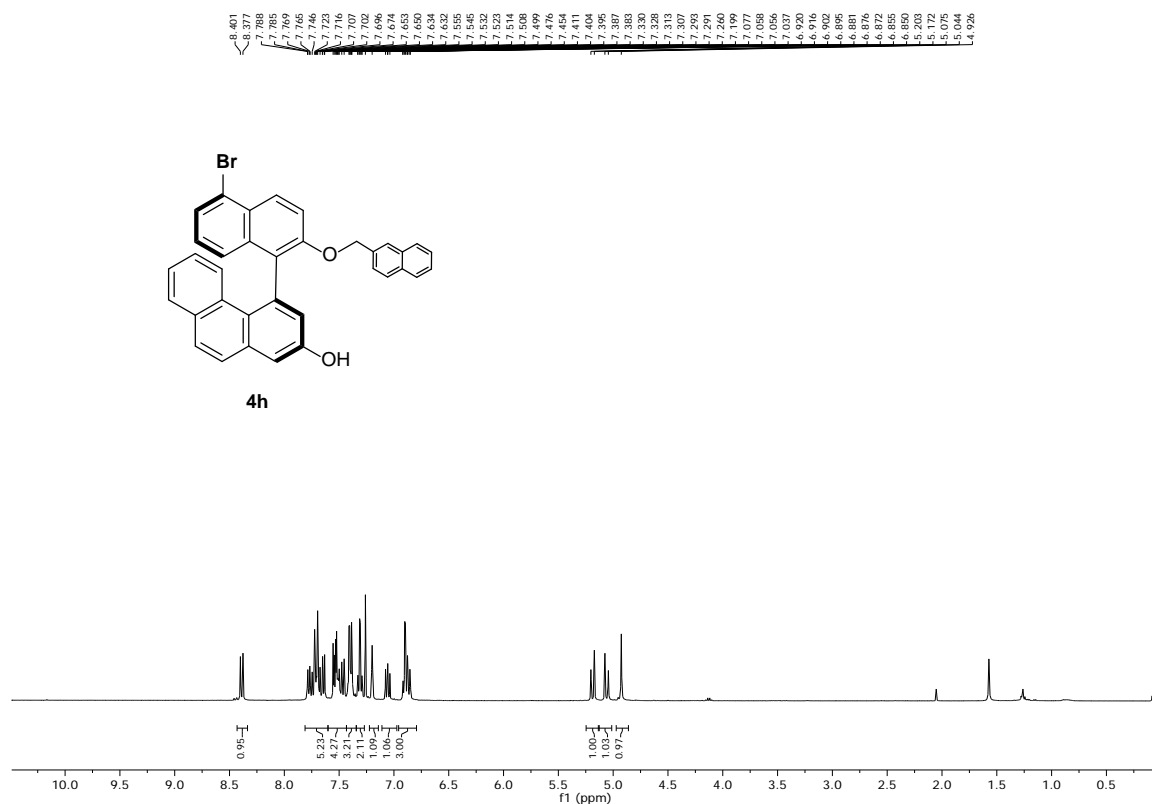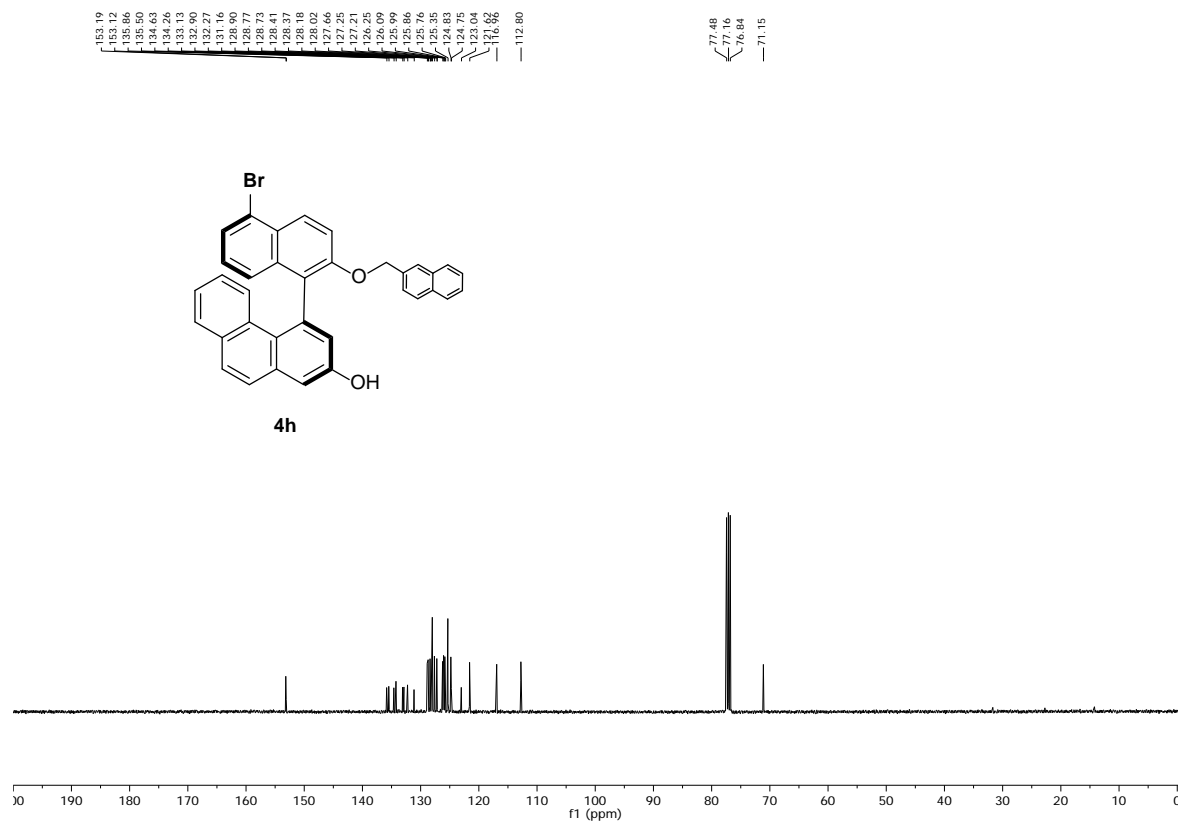

# Compound 4i

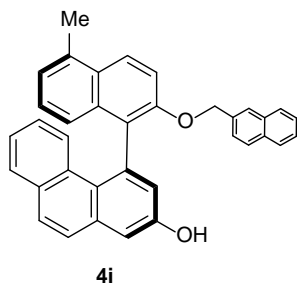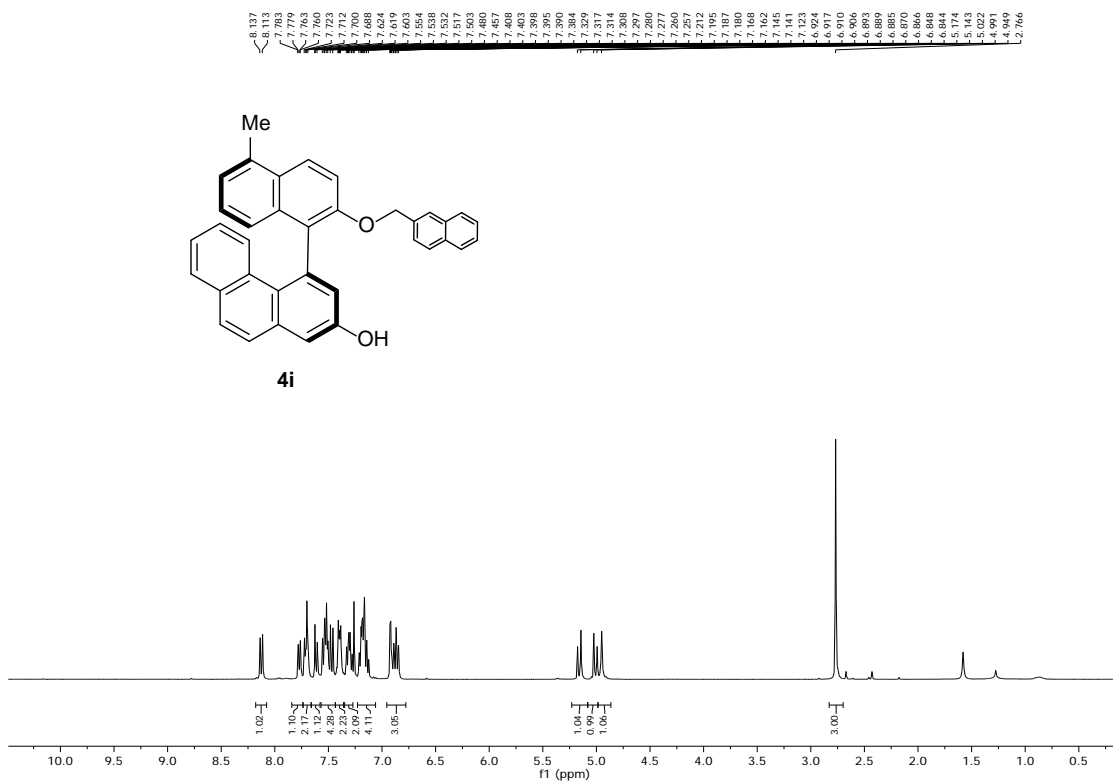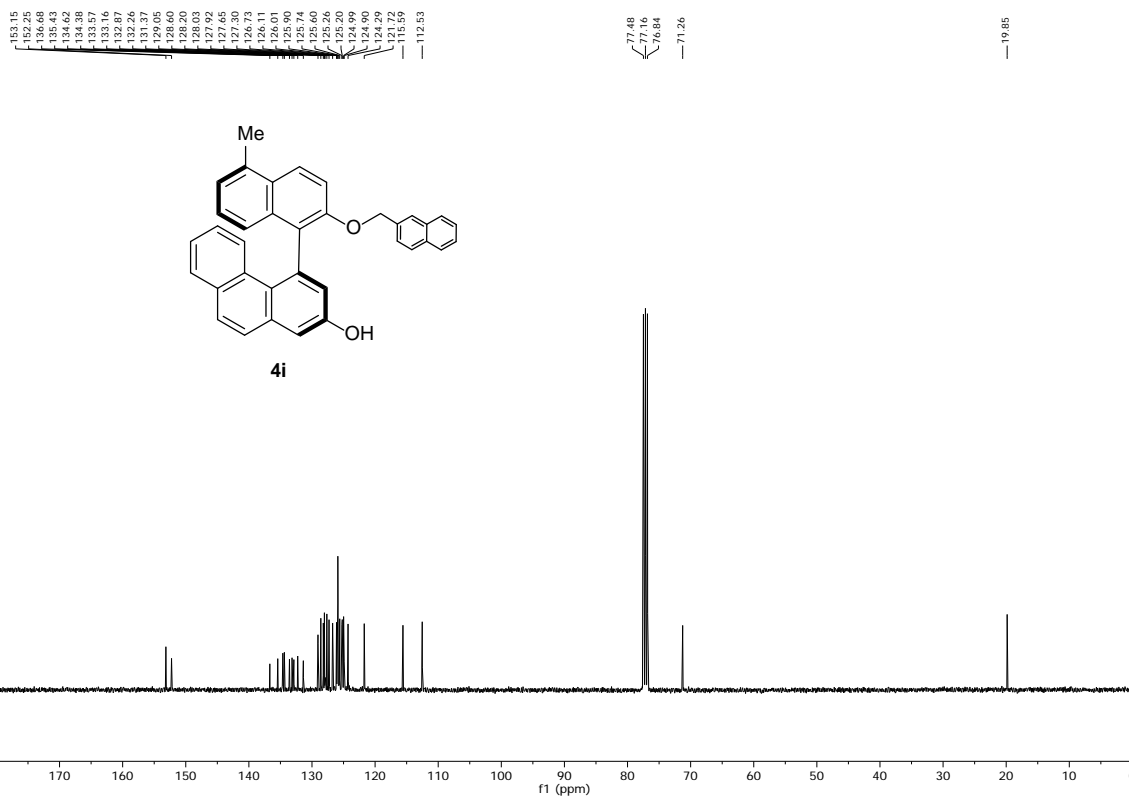



# Compound 4k

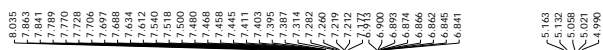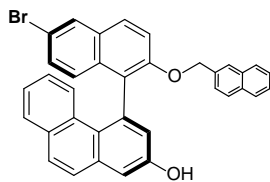

4k

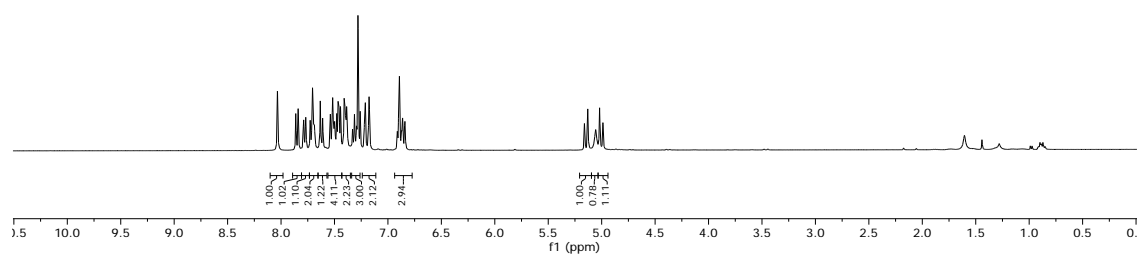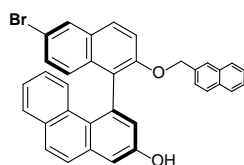

4k

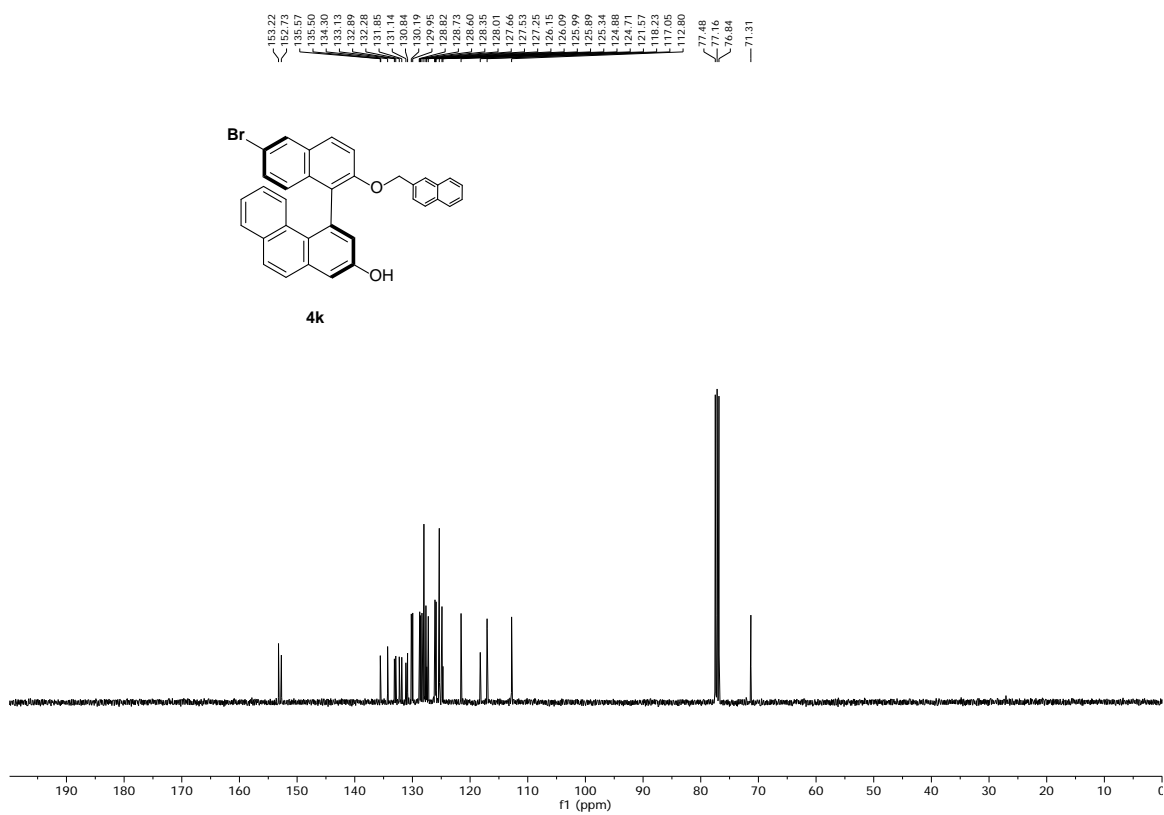

# Compound 41

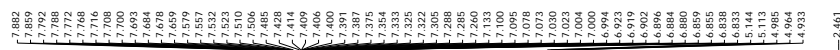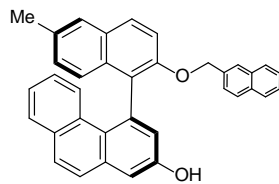

41

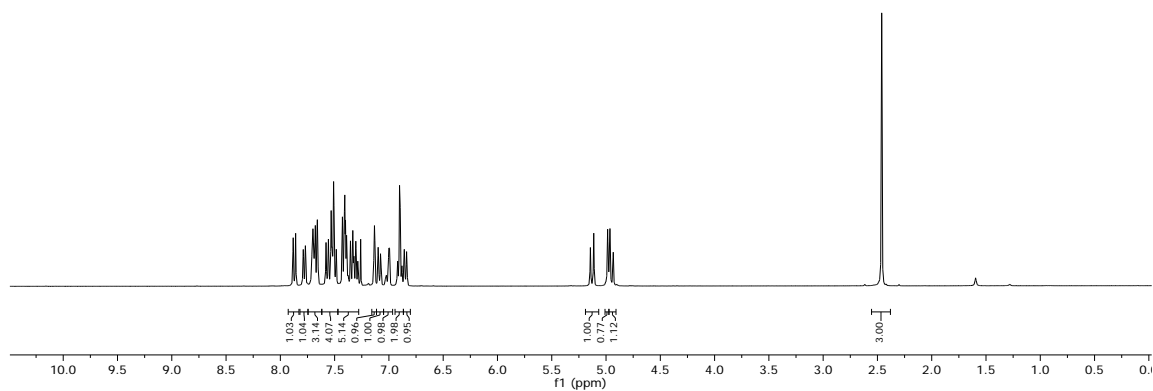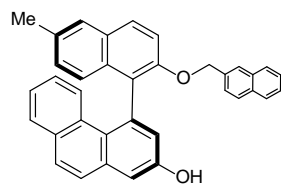

41

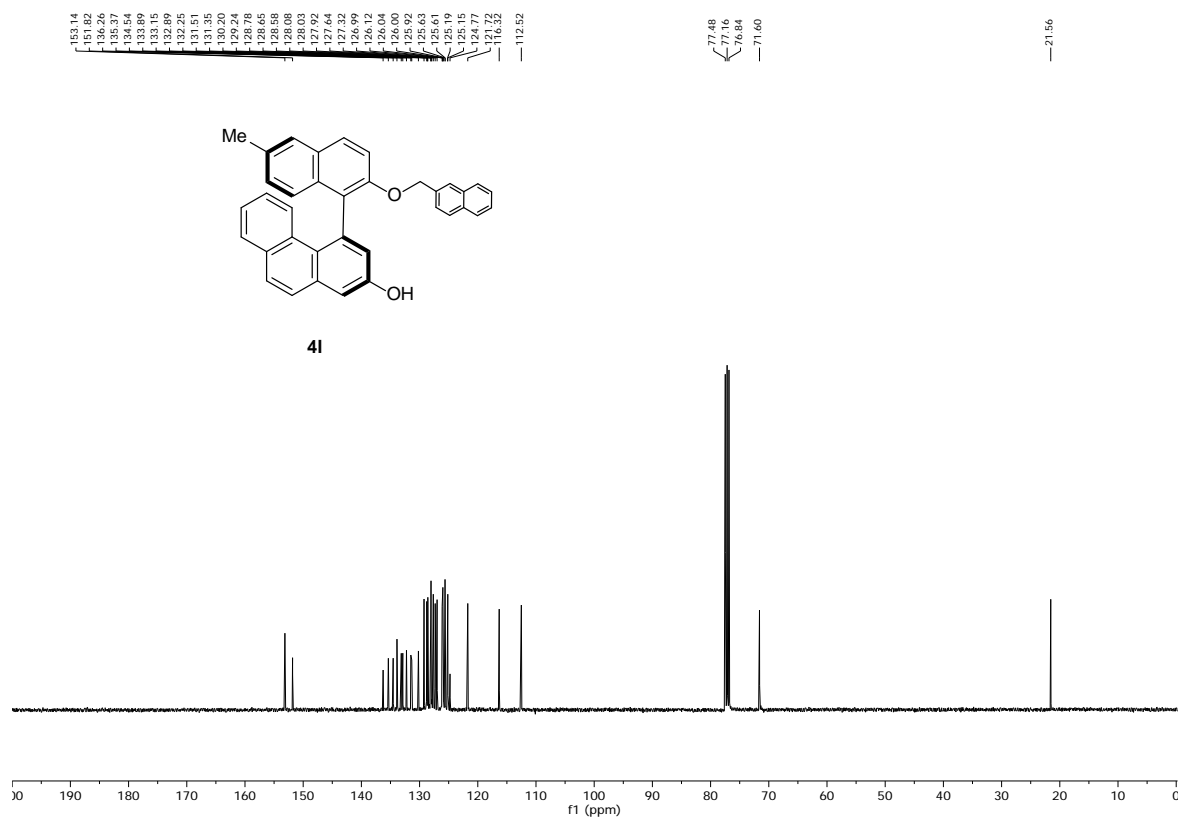

# Compound 4m

8.092  
8.017  
7.995  
7.797  
7.777  
7.753  
7.711  
7.685  
7.665  
7.644  
7.632  
7.622  
7.606  
7.582  
7.553  
7.509  
7.477  
7.456  
7.437  
7.418  
7.402  
7.390  
7.373  
7.354  
7.335  
7.316  
7.296  
7.260  
7.200  
7.193  
7.181  
6.957  
6.956  
6.928  
6.908  
6.872  
6.851  
5.170  
5.159  
5.148  
5.021  
4.990

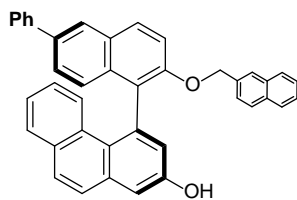

4m

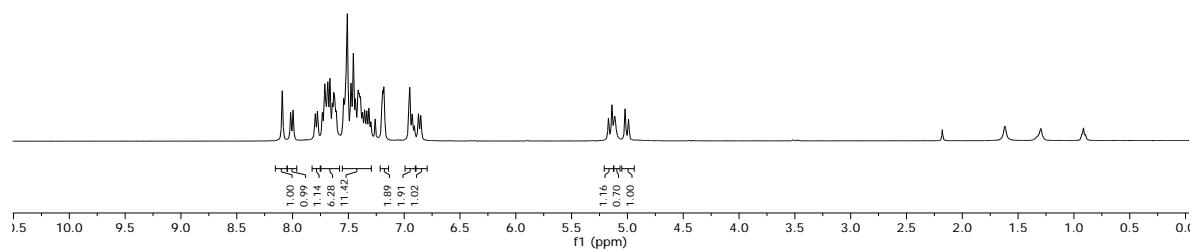

153.24  
152.56  
141.01  
136.94  
136.15  
135.48  
134.51  
133.15  
132.88  
132.77  
132.27  
131.33  
130.11  
129.82  
128.95  
128.65  
128.55  
128.44  
128.03  
127.95  
127.65  
127.32  
126.59  
126.29  
126.14  
126.03  
126.03  
125.87  
125.57  
125.26  
124.99  
124.82  
124.69  
116.51  
112.66

77.48  
77.46  
76.84  
71.36

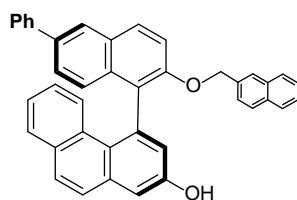

4m

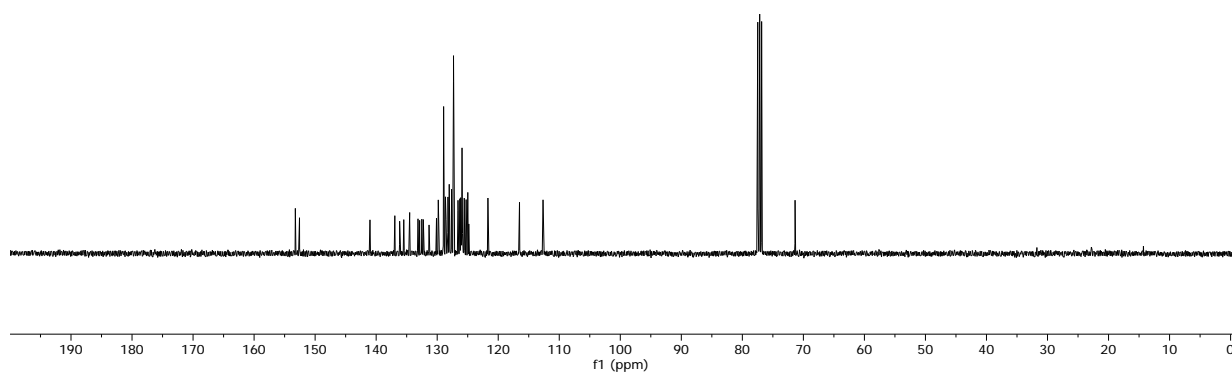



# Compound 4n

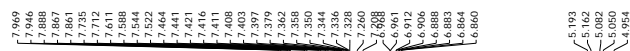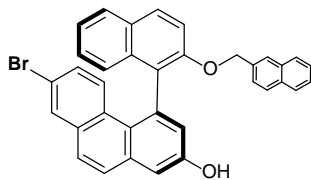

4n

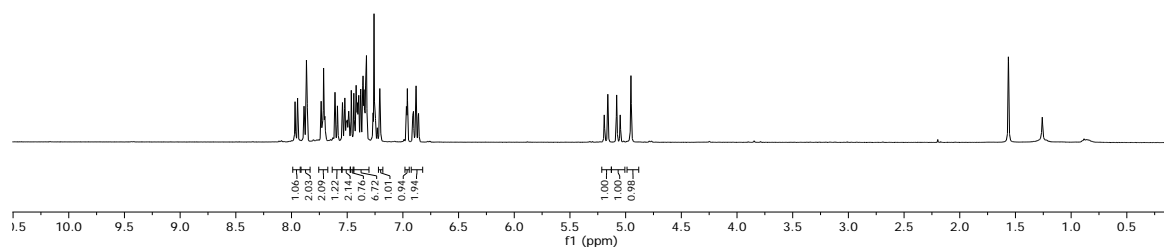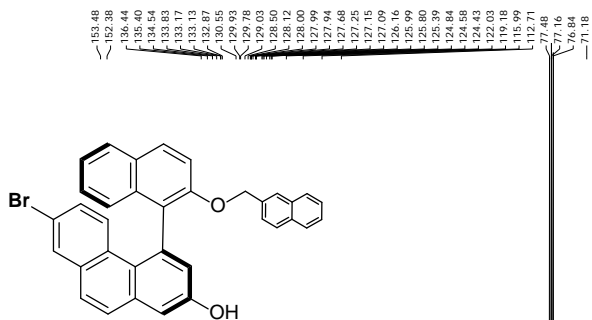

4n

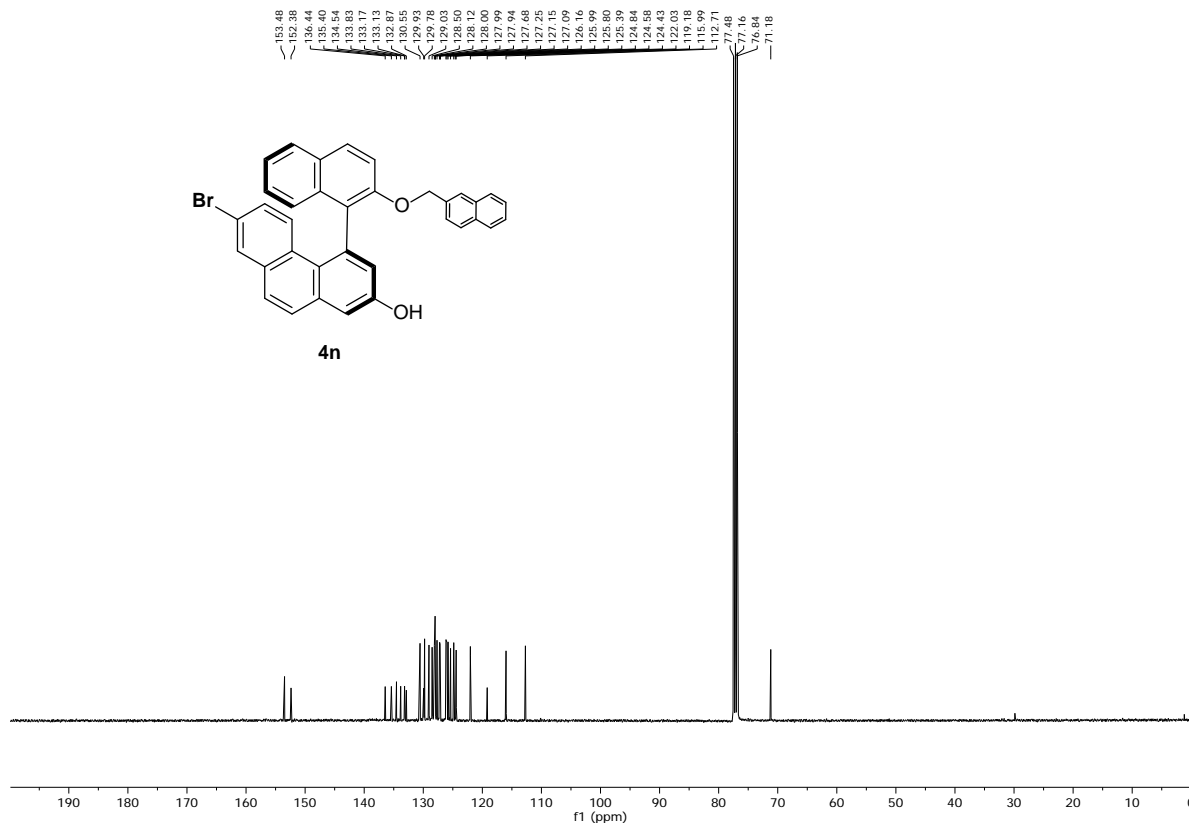

# Compound 4o

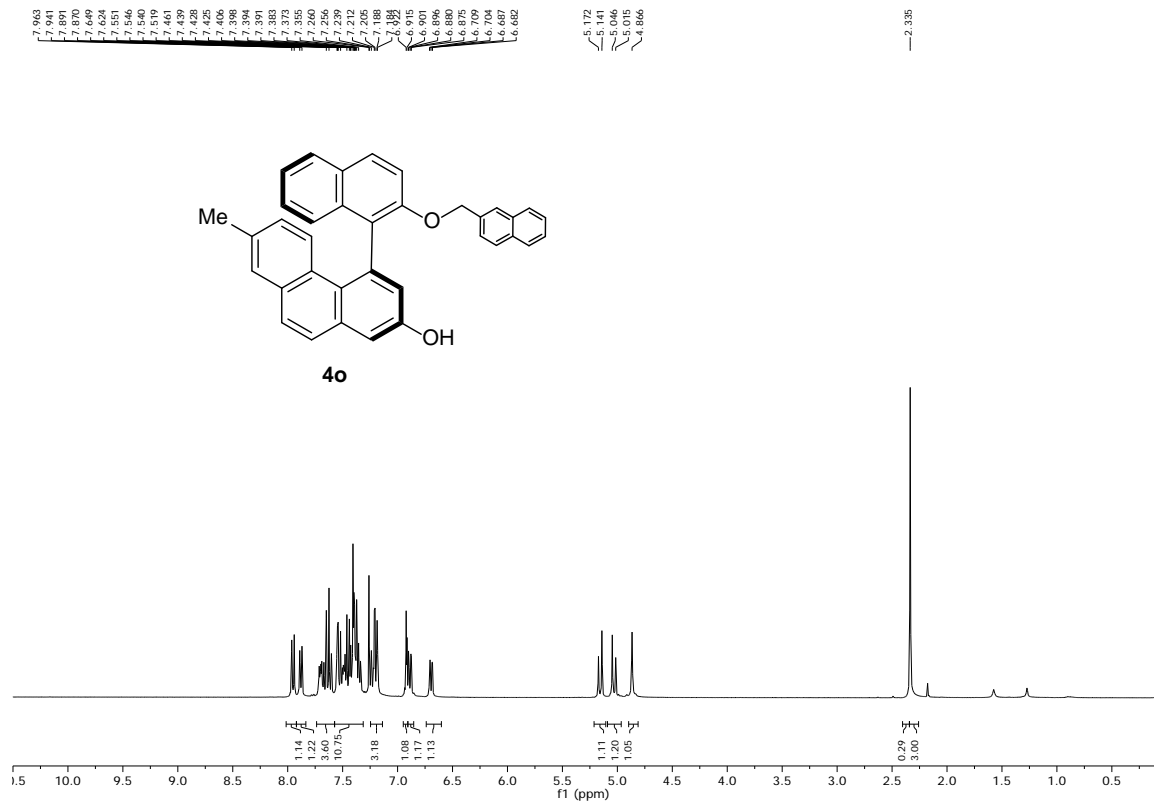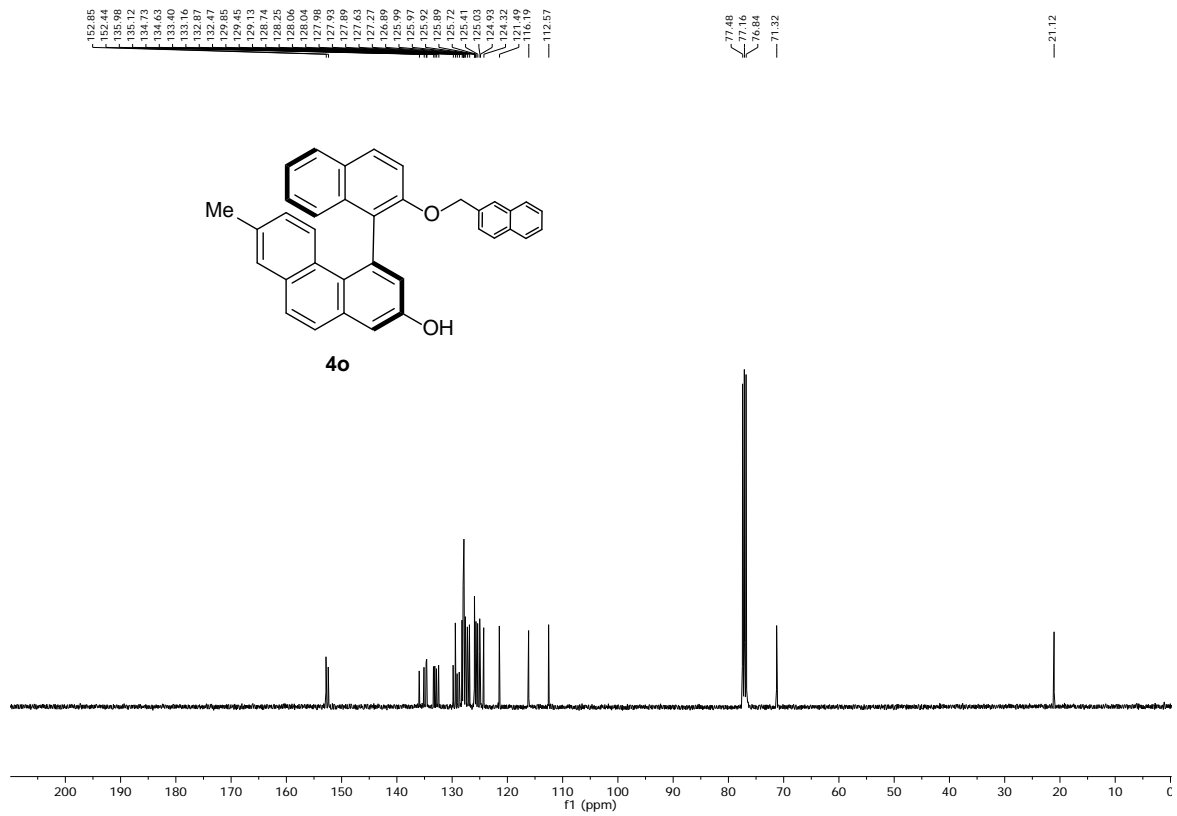

# Compound 4p

8.000  
7.991  
7.986  
7.985  
7.958  
7.951  
7.901  
7.892  
7.881  
7.868  
7.869  
7.778  
7.770  
7.757  
7.748  
7.740  
7.735  
7.675  
7.667  
7.655  
7.647  
7.601  
7.594  
7.594  
7.584  
7.571  
7.558  
7.549  
7.536  
7.529  
7.518  
7.505  
7.498  
7.486  
7.477  
7.470  
7.466  
7.454  
7.447  
7.433  
7.400  
7.386  
7.385  
7.380  
7.369  
7.363  
7.357  
7.350  
7.346  
7.338  
7.327  
7.324  
7.317  
7.307  
7.304  
7.299  
7.291  
7.285  
7.281  
7.269  
7.260  
7.253  
7.253  
7.230  
7.230  
7.144  
7.138  
7.131  
7.122  
7.116  
6.986  
6.977  
6.970  
6.963  
6.907  
6.902  
6.886  
6.886  
6.881  
6.204  
5.172  
5.165  
5.094  
5.097  
5.090  
5.065  
4.894

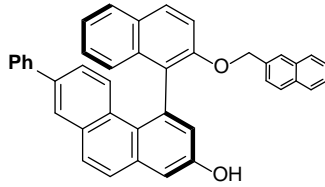

4p

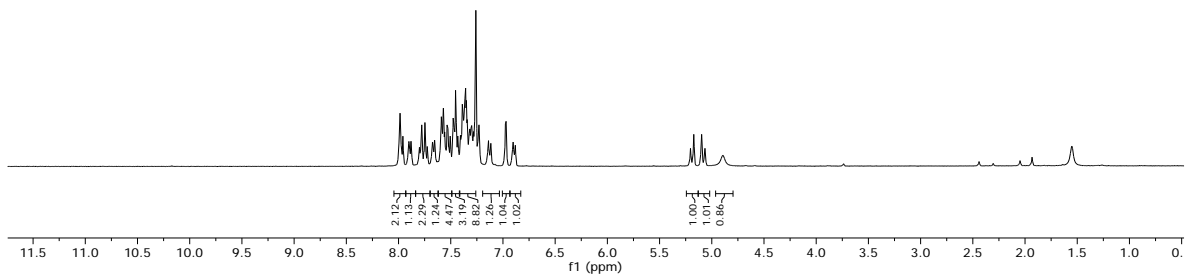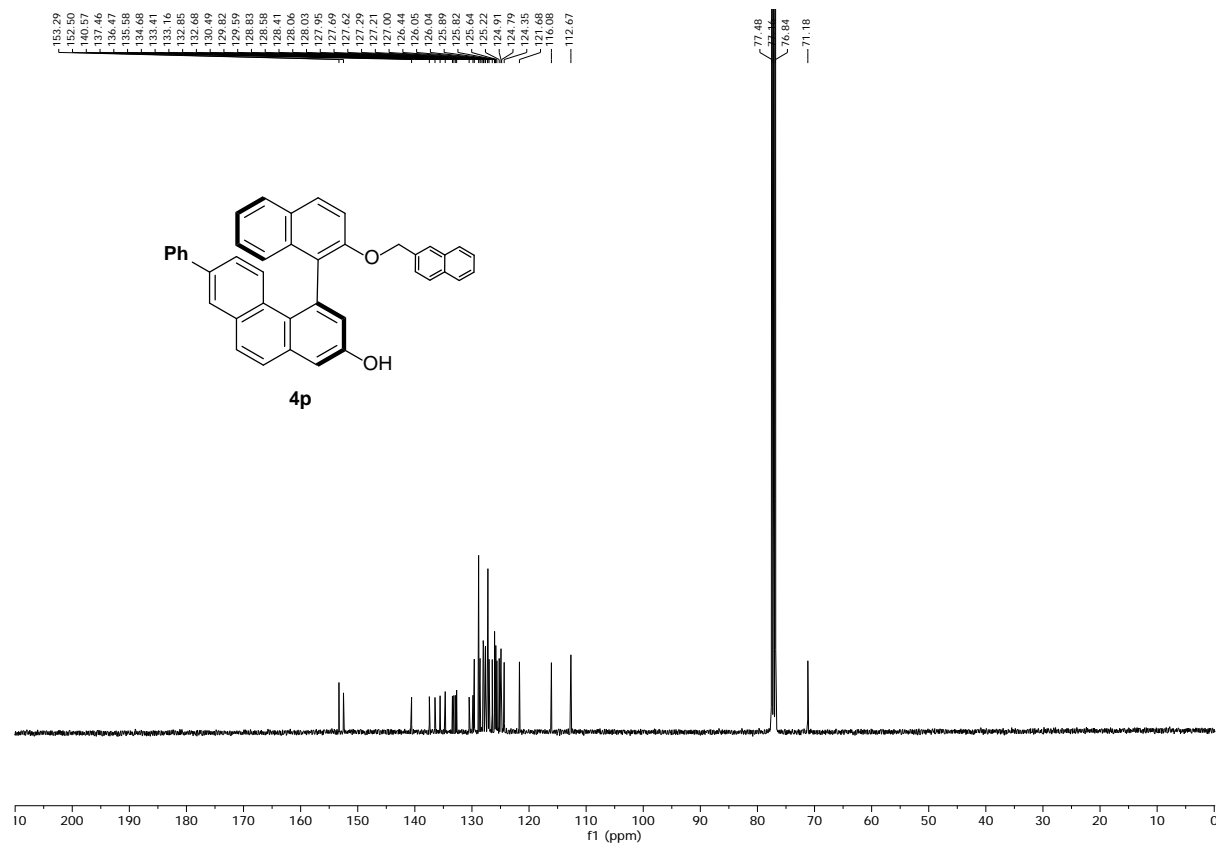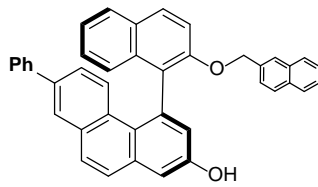

4p

# Compound 4q

7.980  
7.975  
7.953  
7.901  
7.881  
7.776  
7.766  
7.681  
7.678  
7.670  
7.659  
7.648  
7.627  
7.527  
7.505  
7.499  
7.499  
7.484  
7.479  
7.469  
7.469  
7.458  
7.447  
7.438  
7.387  
7.383  
7.360  
7.346  
7.342  
7.332  
7.322  
7.319  
7.305  
7.302  
7.292  
7.265  
7.265  
7.260  
7.244  
7.237  
7.213  
7.143  
7.137  
7.120  
7.115  
6.955  
6.938  
6.938  
6.897  
6.881  
6.876  
5.762  
5.762  
5.043  
4.896

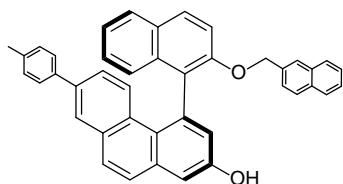

4q

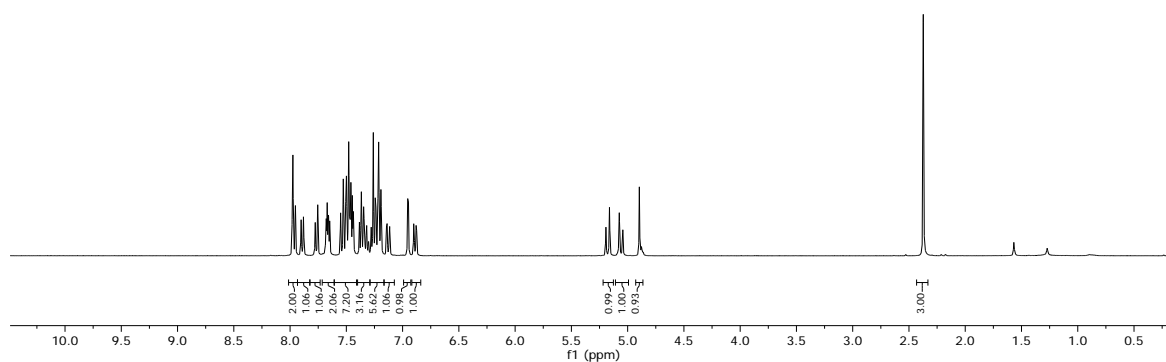

153.17  
152.47  
137.65  
137.66  
137.04  
136.32  
135.47  
134.61  
133.41  
133.15  
132.85  
132.85  
130.28  
129.83  
129.56  
128.53  
128.46  
128.04  
127.95  
127.76  
127.01  
126.99  
126.13  
126.03  
126.00  
125.91  
125.89  
125.89  
125.09  
124.96  
124.79  
124.35  
121.66  
112.65

77.48  
77.16  
76.84  
71.25

21.24

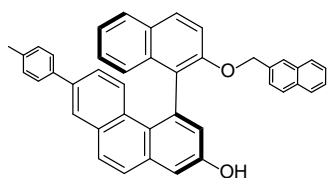

4q

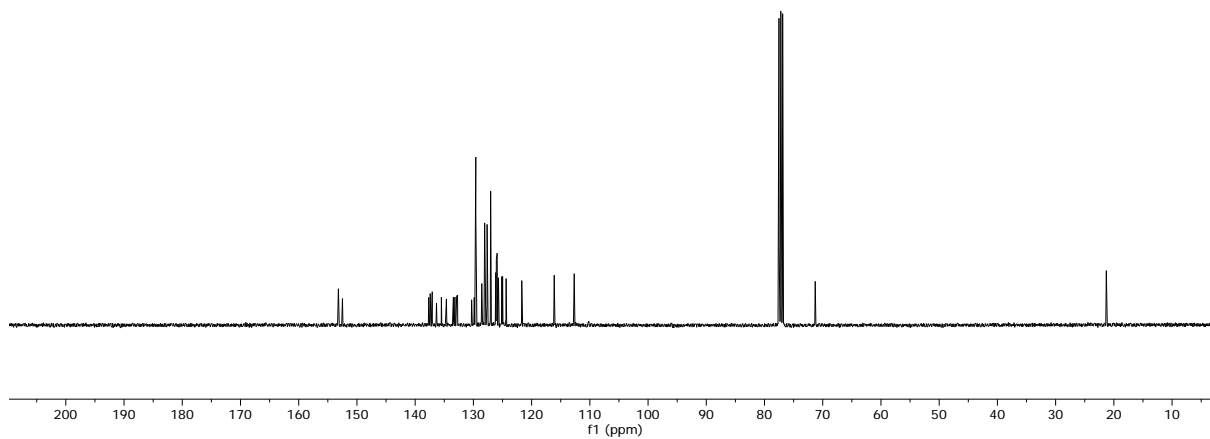

# Compound 4r

7.994  
7.979  
7.975  
7.972  
7.907  
7.887  
7.779  
7.753  
7.750  
7.669  
7.650  
7.638  
7.617  
7.606  
7.556  
7.513  
7.494  
7.472  
7.456  
7.448  
7.443  
7.389  
7.386  
7.380  
7.377  
7.362  
7.345  
7.360  
7.356  
7.351  
7.351  
7.348  
7.343  
7.343  
7.327  
7.327  
7.323  
7.310  
7.310  
7.306  
7.303  
7.303  
7.284  
7.280  
7.280  
7.267  
7.260  
7.245  
7.245  
7.227  
7.227  
7.107  
7.101  
7.084  
7.079  
7.079  
6.978  
6.978  
6.906  
6.901  
6.885  
6.880  
6.872  
6.872  
5.175  
5.110  
5.079

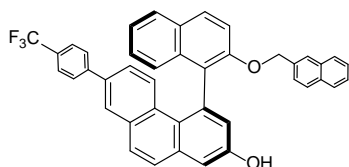

4r

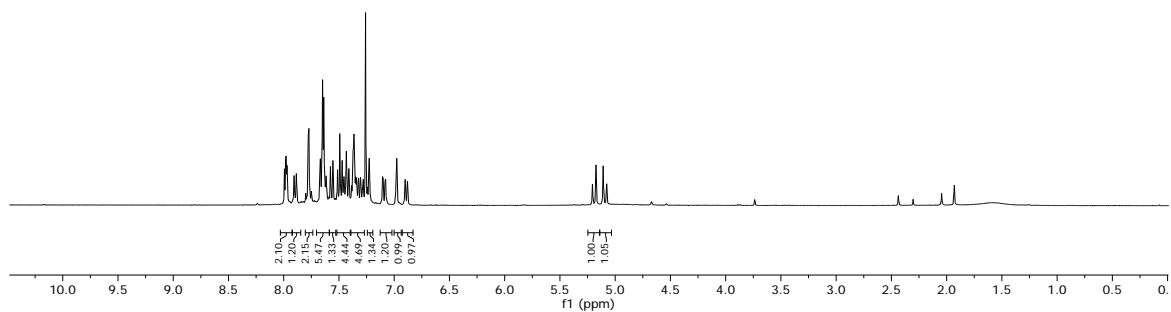

153.51  
152.46  
144.09  
136.64  
135.75  
135.75  
134.63  
133.35  
133.13  
132.84  
132.63  
131.70  
129.82  
129.62  
128.43  
128.26  
128.10  
128.03  
127.96  
127.93  
127.63  
127.63  
127.09  
126.79  
126.26  
126.05  
125.94  
125.83  
125.80  
125.76  
125.76  
125.62  
125.62  
124.97  
124.90  
124.62  
124.41  
124.41  
119.05  
112.72  
77.16  
76.84  
71.17

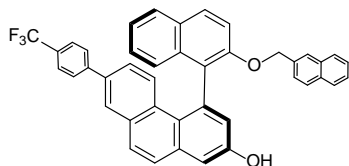

4r

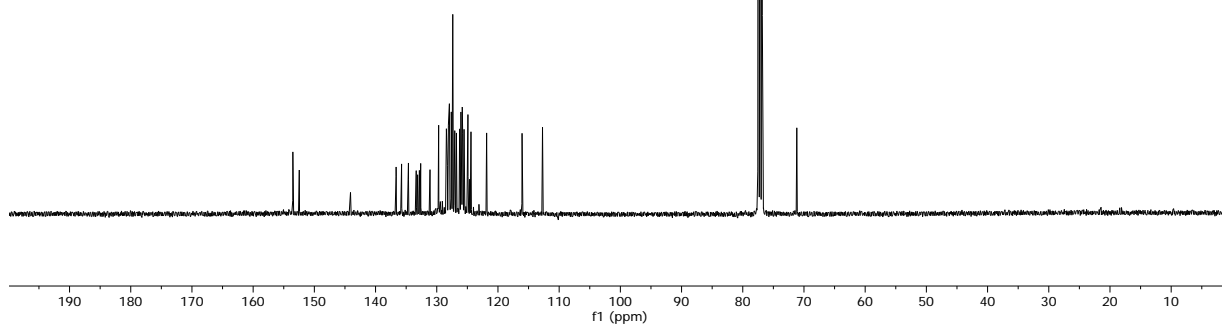

—62.36

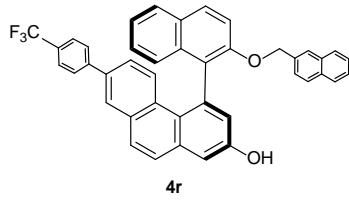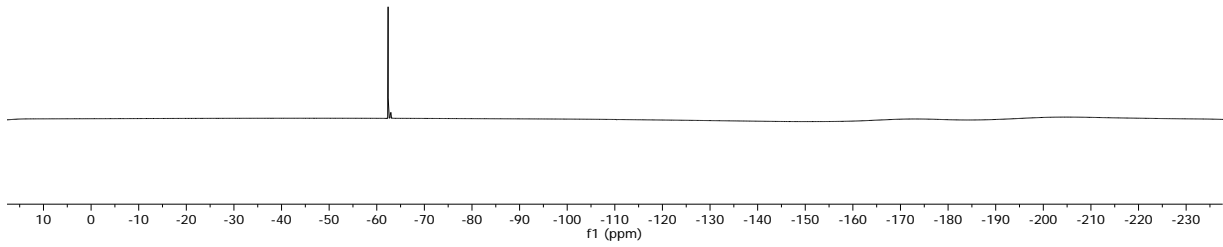

# Compound 4s

7.970, 7.948, 7.924, 7.904, 7.884, 7.869, 7.879, 7.877, 7.775, 7.772, 7.706, 7.684, 7.675, 7.657, 7.644, 7.558, 7.533, 7.524, 7.517, 7.508, 7.485, 7.474, 7.471, 7.464, 7.462, 7.454, 7.451, 7.441, 7.437, 7.382, 7.365, 7.362, 7.359, 7.345, 7.342, 7.333, 7.329, 7.316, 7.313, 7.309, 7.298, 7.288, 7.285, 7.279, 7.275, 7.272, 7.254, 7.251, 7.241, 7.237, 7.221, 7.218, 7.183, 7.086, 7.080, 6.959, 6.951, 6.947, 6.939, 6.934, 6.923, 6.917, 6.904, 6.904, 6.883, 6.878, 5.185, 5.080, 5.048, 4.936, 3.829

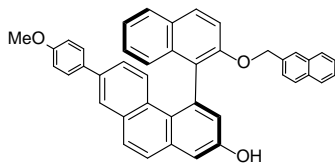

4s

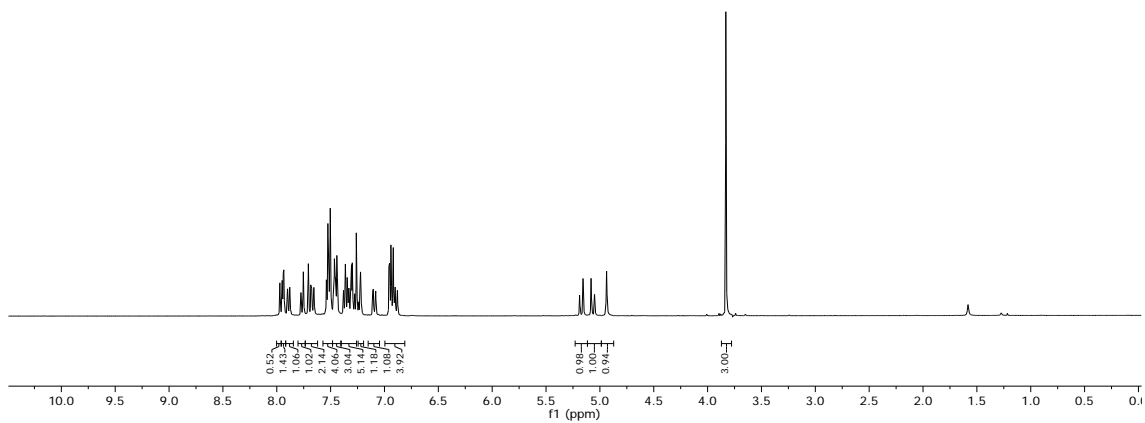

159.19, 155.19, 152.47, 137.07, 136.31, 135.43, 135.15, 133.41, 133.14, 133.11, 132.83, 132.72, 132.62, 129.81, 129.54, 128.54, 128.45, 128.19, 127.93, 127.83, 127.61, 126.98, 126.02, 126.00, 125.83, 125.83, 125.78, 125.66, 124.94, 124.91, 124.84, 124.34, 121.63, 121.63, 114.28, 112.65, 77.16, 76.84, 71.17, 55.47

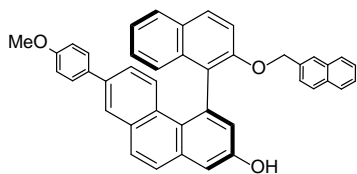

4s

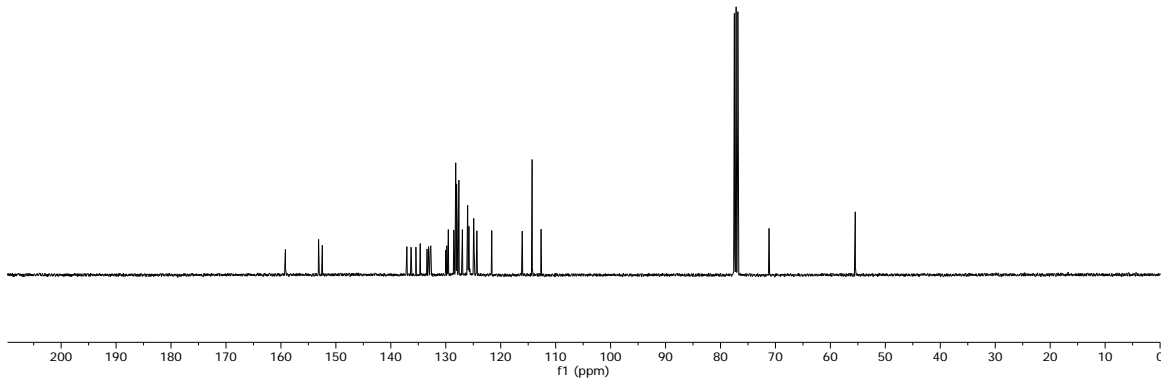





# Compound 4u

7.817  
7.812  
7.797  
7.790  
7.786  
7.781  
7.731  
7.658  
7.637  
7.586  
7.581  
7.413  
7.405  
7.399  
7.377  
7.361  
7.350  
7.300  
7.297  
7.282  
7.279  
7.260  
7.258  
7.246  
7.243  
7.227  
7.224  
7.222  
7.145  
7.133  
7.131  
6.726  
6.673  
6.667  
6.179  
6.174  
5.223  
5.201  
5.181  
5.150  
4.828  
3.913  
3.037

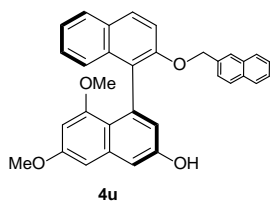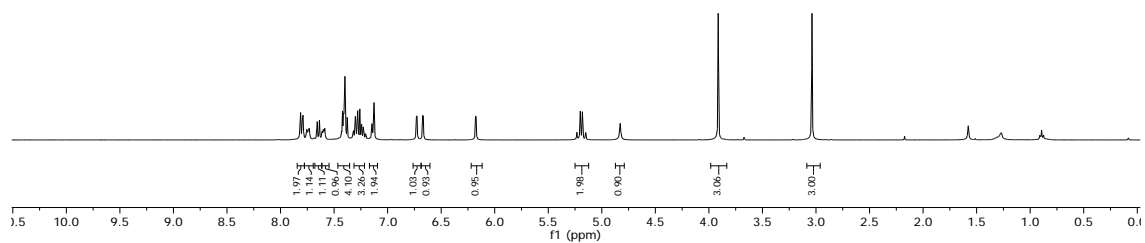

158.68  
158.49  
153.68  
152.04  
148.92  
135.23  
135.08  
133.98  
133.29  
132.90  
129.91  
129.11  
128.07  
127.90  
127.88  
127.67  
126.61  
126.01  
125.97  
125.86  
125.16  
123.53  
123.53  
117.00  
116.66  
116.16  
109.26  
98.23  
97.12  
77.48  
77.16  
76.84  
71.83  
55.39

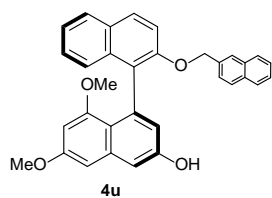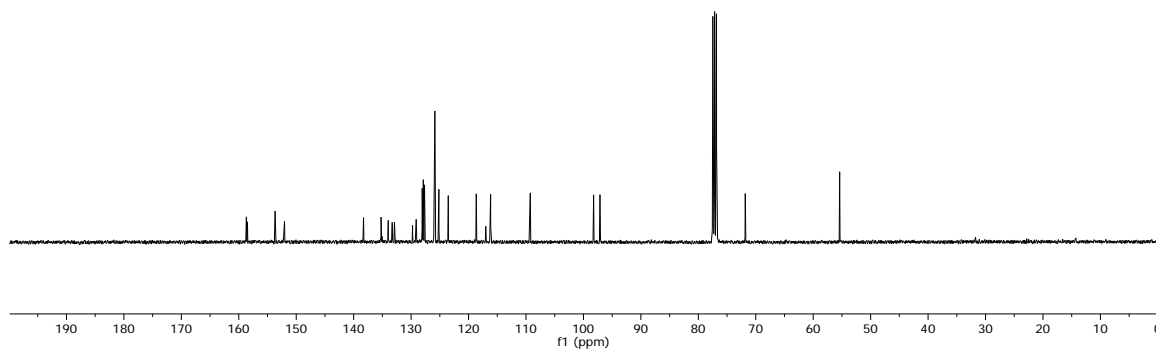

# Compound 7

7.975, 7.952, 7.900, 7.890, 7.878, 7.878, 7.826, 7.804, 7.788, 7.766, 7.768, 7.747, 7.718, 7.712, 7.707, 7.694, 7.579, 7.577, 7.556, 7.556, 7.521, 7.515, 7.511, 7.505, 7.499, 7.499, 7.472, 7.459, 7.453, 7.451, 7.436, 7.436, 7.411, 7.411, 7.405, 7.398, 7.395, 7.388, 7.381, 7.378, 7.371, 7.371, 7.364, 7.357, 7.357, 7.344, 7.341, 7.314, 7.297, 7.294, 7.292, 7.277, 7.274, 7.268, 7.252, 7.252, 7.239, 7.235, 7.235, 7.196, 7.196, 7.134, 7.134, 7.127, 7.127, 6.900, 6.900, 6.882, 6.882, 6.877, 6.865, 6.860, 6.855, 6.847, 5.140, 5.052, 5.021, 3.951

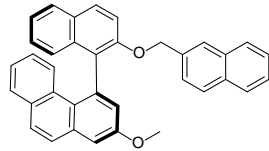

7

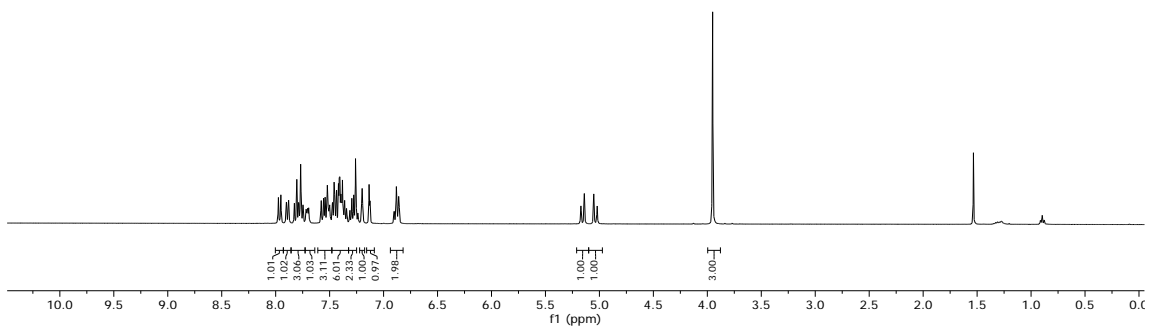

157.29, 152.60, 136.13, 135.35, 134.81, 133.19, 132.84, 132.26, 129.81, 129.62, 128.59, 128.16, 128.01, 127.99, 127.87, 127.64, 127.64, 126.88, 126.03, 125.95, 125.80, 125.75, 125.59, 125.59, 124.89, 124.77, 124.24, 121.66, 116.01, 109.70, 77.16, 76.84, 71.10, 55.49

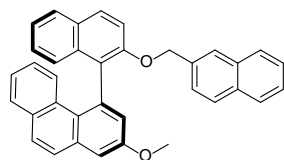

7

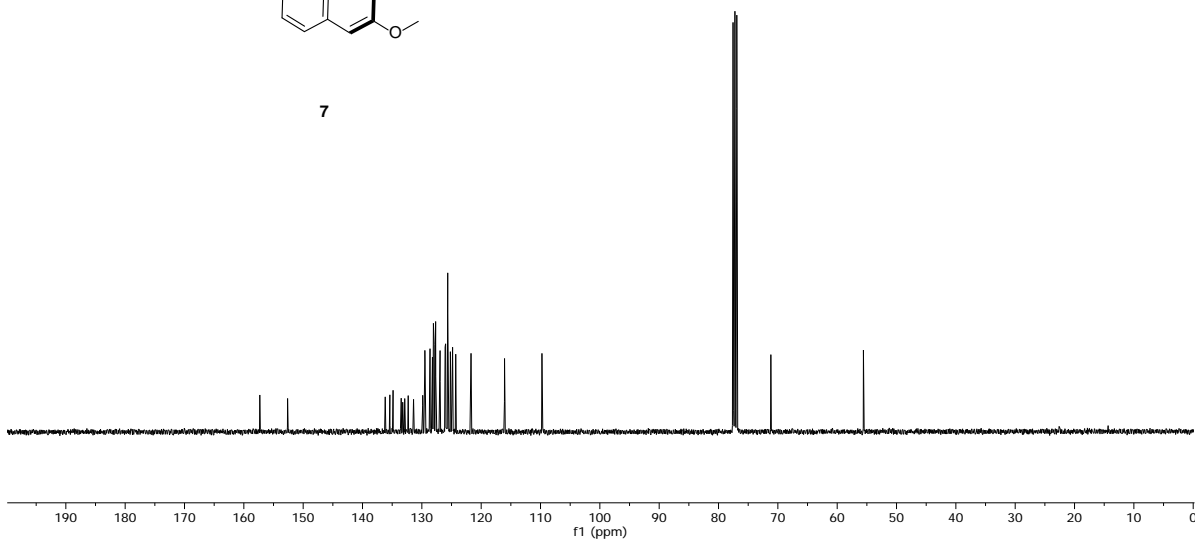

# Compound 8

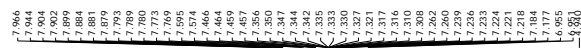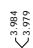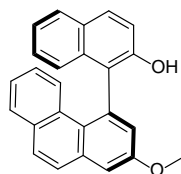

8

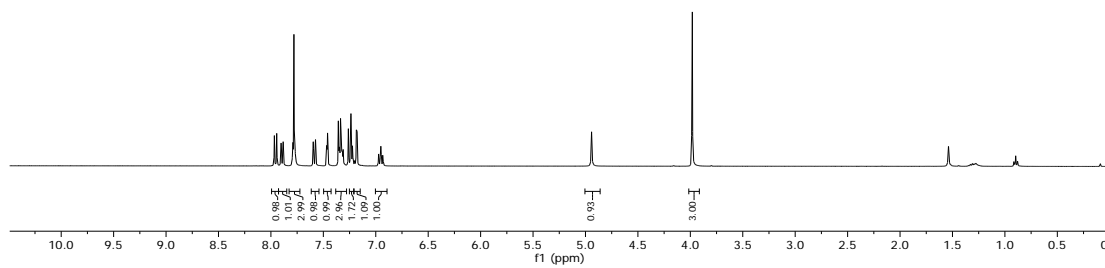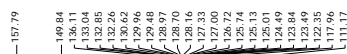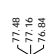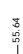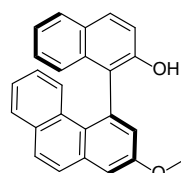

8

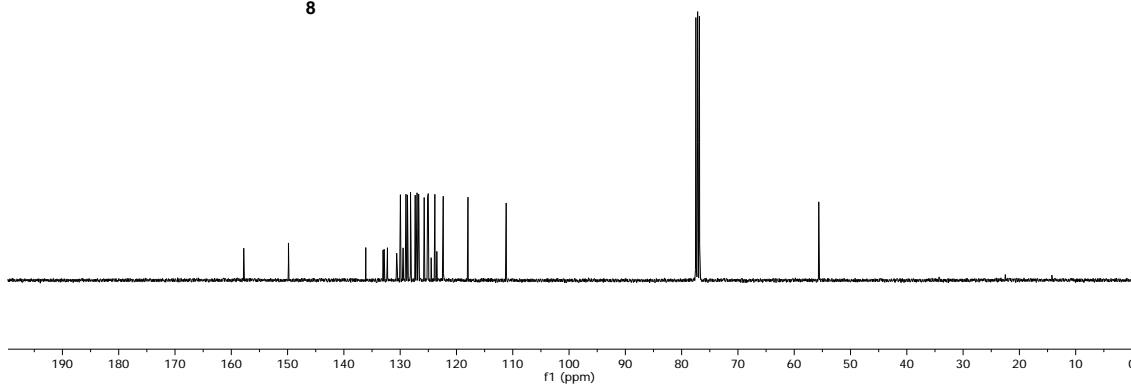

# Compound 9

8.111  
8.088  
8.024  
8.003  
7.802  
7.798  
7.777  
7.769  
7.747  
7.738  
7.571  
7.568  
7.565  
7.560  
7.555  
7.547  
7.539  
7.536  
7.515  
7.475  
7.468  
7.384  
7.367  
7.359  
7.345  
7.325  
7.326  
7.310  
7.308  
7.295  
7.288  
7.260  
7.179  
7.169  
7.150  
7.147  
6.903  
6.895  
6.891  
6.887  
6.874  
6.870  
— 3.990

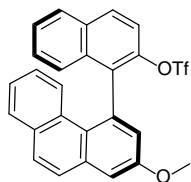

9

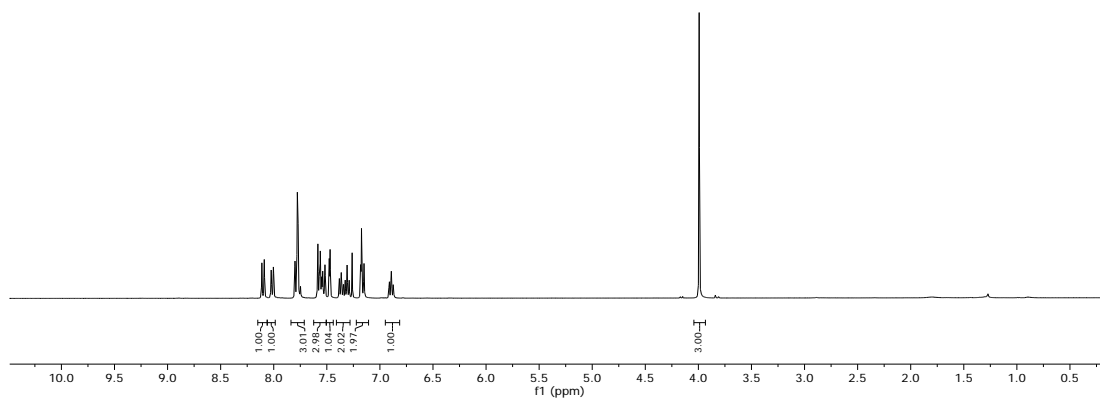

157.03  
144.04  
135.53  
134.75  
133.14  
132.92  
132.41  
131.83  
130.49  
129.86  
128.62  
128.32  
128.06  
127.85  
127.38  
127.08  
126.14  
125.38  
125.19  
124.72  
121.77  
120.06  
119.86  
116.67  
111.20  
77.48  
77.16  
76.64  
55.72

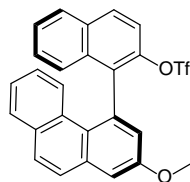

9

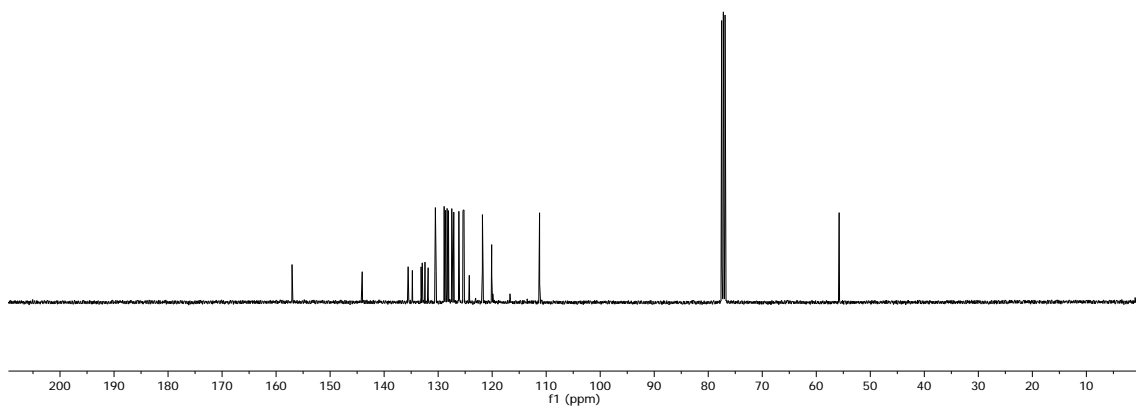

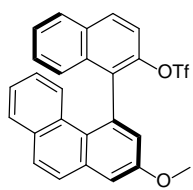

**9**

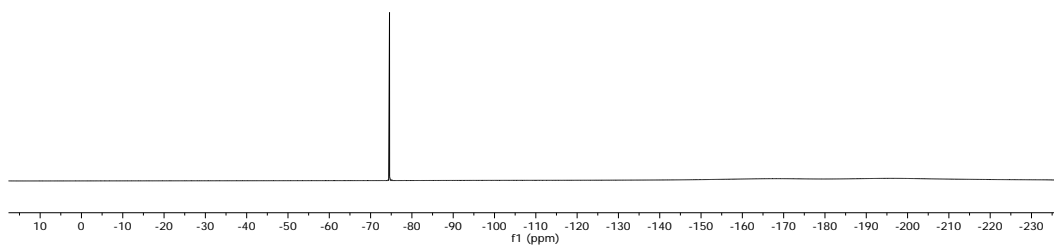

# Compound 10

8.088  
8.074  
8.071  
8.066  
8.046  
8.024  
7.954  
7.933  
7.667  
7.647  
7.644  
7.555  
7.553  
7.541  
7.512  
7.507  
7.499  
7.491  
7.489  
7.479  
7.469  
7.447  
7.441  
7.440  
7.423  
7.420  
7.412  
7.394  
7.394  
7.393  
7.273  
7.269  
7.267  
7.261  
7.261  
7.240  
7.240  
7.230  
7.228  
7.223  
7.217  
7.157  
7.150  
7.143  
7.140  
7.137  
7.137  
7.101  
7.093  
7.072  
7.050  
7.050  
7.027  
7.015  
7.010  
7.007  
6.999  
6.991  
6.865  
6.861  
6.844  
6.843  
6.839  
6.825  
6.822  
6.811  
6.806  
6.798  
6.786  
6.779  
6.817

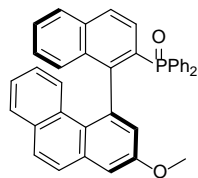

10

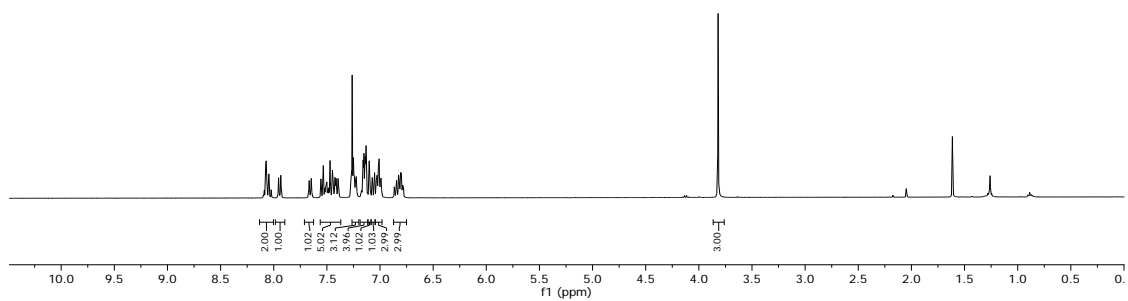

156.46  
147.09  
147.00  
136.62  
136.57  
135.02  
135.00  
134.81  
133.10  
132.93  
132.82  
132.71  
132.26  
131.66  
131.98  
131.89  
131.21  
131.12  
130.98  
130.66  
130.68  
129.54  
129.43  
128.89  
128.88  
128.35  
128.11  
128.08  
128.07  
127.95  
127.92  
127.66  
127.54  
127.47  
127.37  
127.35  
127.35  
127.08  
126.15  
125.66  
124.90  
124.88  
121.19  
121.18  
112.02  
77.48  
77.16  
76.84  
55.61

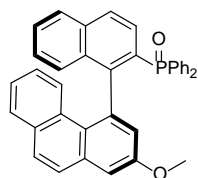

10

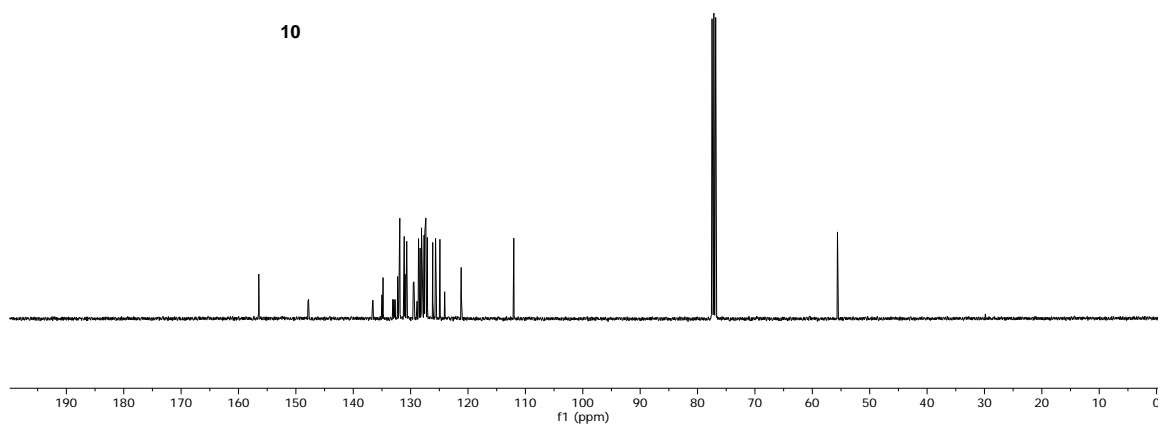

—28.29

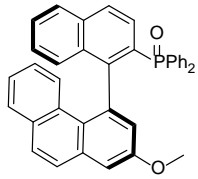

**10**

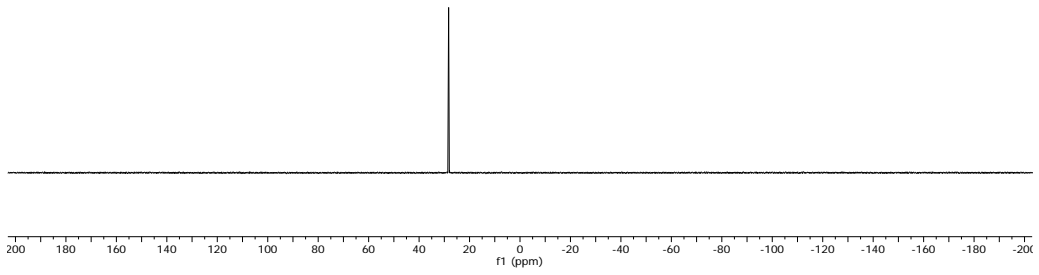

# Compound 11

7.937, 7.905, 7.895, 7.797, 7.794, 7.790, 7.775, 7.770, 7.760, 7.737, 7.488, 7.485, 7.485, 7.485, 7.468, 7.464, 7.450, 7.447, 7.447, 7.409, 7.406, 7.398, 7.395, 7.395, 7.382, 7.382, 7.340, 7.322, 7.310, 7.310, 7.279, 7.260, 7.255, 7.250, 7.250, 7.237, 7.232, 7.225, 7.225, 7.222, 7.205, 7.195, 7.187, 7.182, 7.182, 7.174, 7.165, 7.161, 7.146, 7.146, 7.129, 7.125, 7.121, 7.121, 6.997, 6.997, 6.990, 6.977, 6.973, 6.959, 6.959, 6.938, 6.938, 6.904, 6.891, 6.886, 6.886, 6.869, 6.865, 6.736, 6.729, 3.978

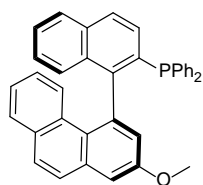

11

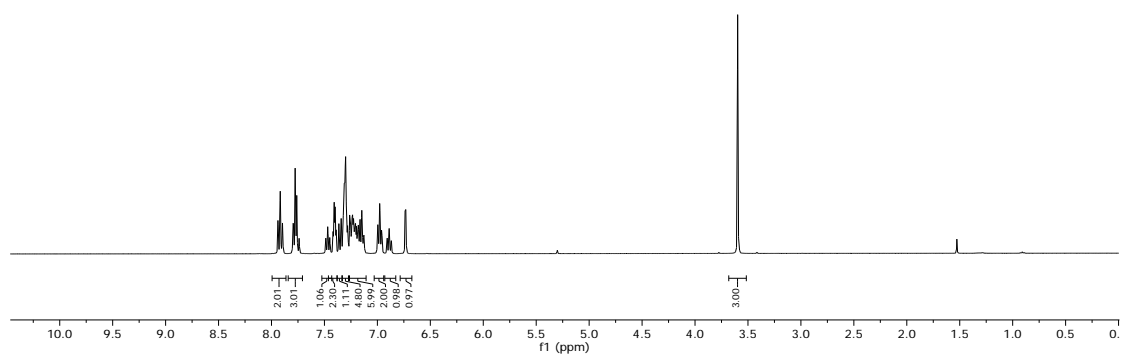

156.51, 149.63, 138.95, 138.87, 138.87, 138.07, 137.38, 137.26, 135.16, 134.05, 134.02, 133.91, 133.56, 133.52, 133.45, 133.22, 132.51, 132.43, 131.06, 130.74, 130.74, 128.49, 128.49, 128.47, 128.40, 128.29, 128.23, 128.16, 128.00, 127.59, 127.14, 127.01, 126.95, 126.95, 126.24, 125.95, 125.04, 124.14, 124.14, 120.86, 120.77, 111.40, 111.40, 77.48, 77.16, 77.05, 55.24

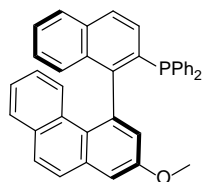

11

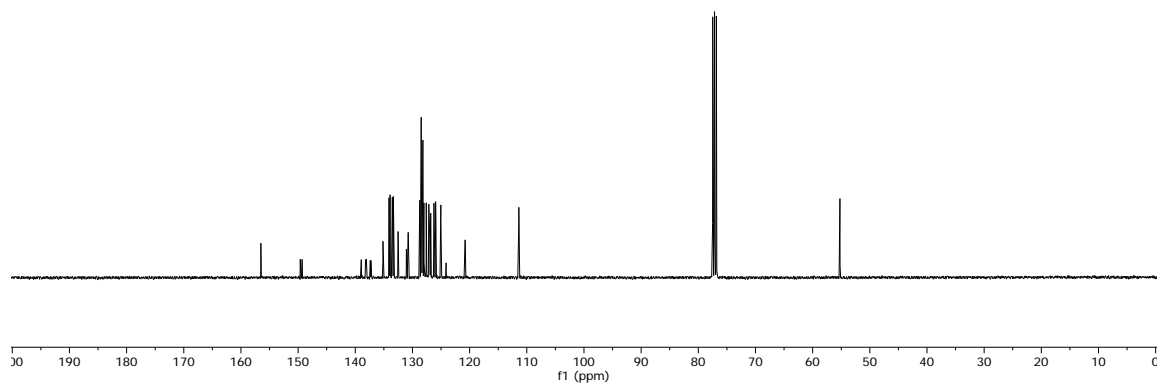



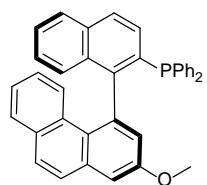

11

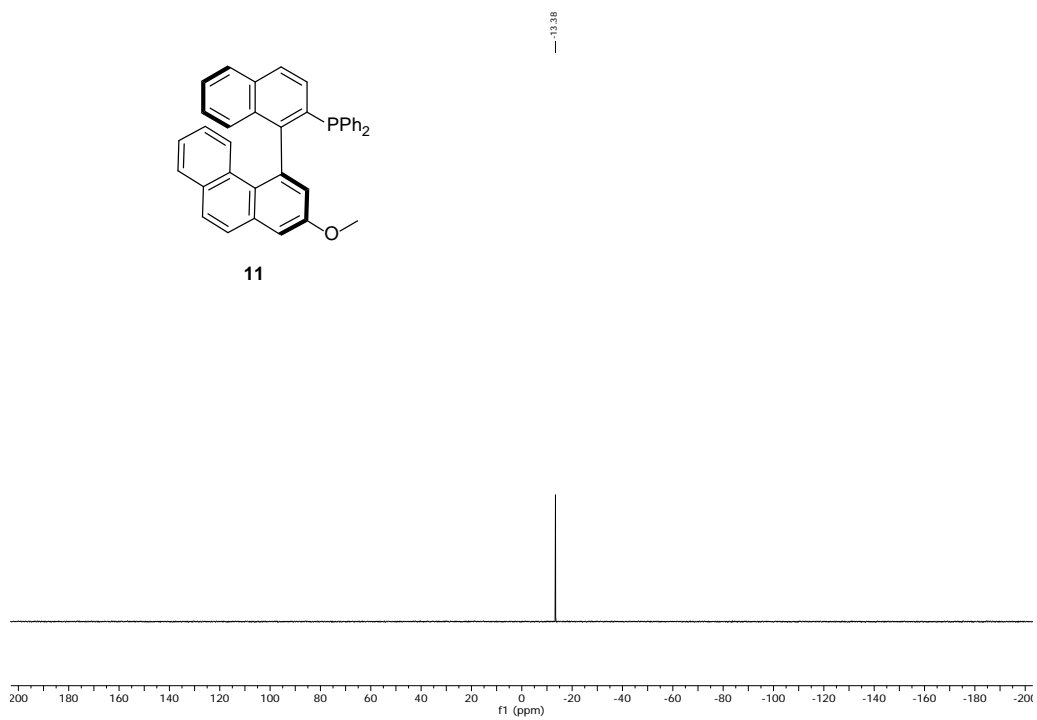

# Compound 12

8.008  
8.003  
7.996  
7.985  
7.962  
7.942  
7.789  
7.777  
7.771  
7.702  
7.696  
7.683  
7.673  
7.663  
7.590  
7.566  
7.562  
7.553  
7.545  
7.542  
7.505  
7.501  
7.483  
7.467  
7.452  
7.455  
7.445  
7.422  
7.415  
7.405  
7.389  
7.389  
7.369  
7.349  
7.349  
7.303  
7.293  
7.290  
7.276  
7.276  
7.260  
7.254  
7.250  
7.234  
7.217  
7.200  
7.196  
7.186  
7.167  
7.163  
7.125  
7.108  
7.108  
7.099  
7.086  
7.080  
6.983  
6.983  
6.763  
6.746  
6.732  
6.724  
6.720

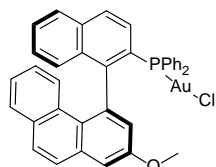

12

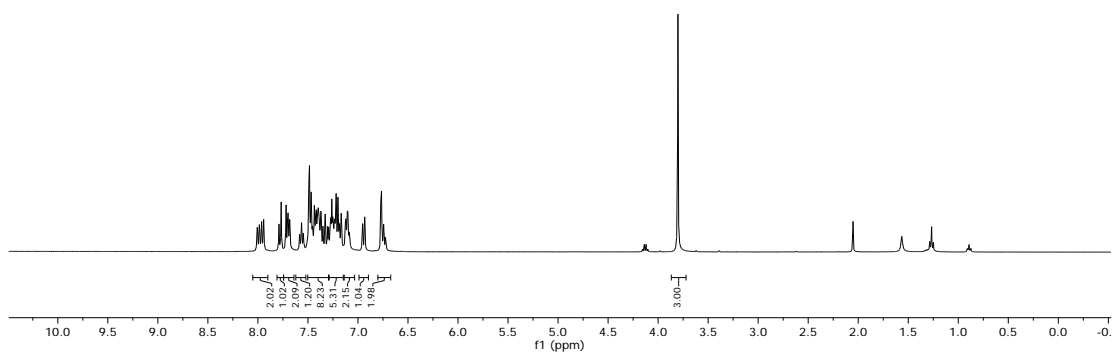

156.85  
149.94  
149.80  
136.15  
135.74  
135.88  
134.66  
134.42  
134.42  
134.07  
133.22  
133.12  
133.12  
133.158  
133.156  
133.125  
133.122  
133.048  
129.86  
129.09  
128.98  
128.98  
128.95  
128.81  
128.73  
128.50  
128.50  
128.34  
128.09  
127.84  
127.84  
127.63  
127.61  
126.89  
126.78  
126.51  
124.43  
124.36  
123.81  
123.81  
111.82  
111.82  
77.16  
76.84  
55.37

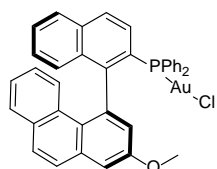

12

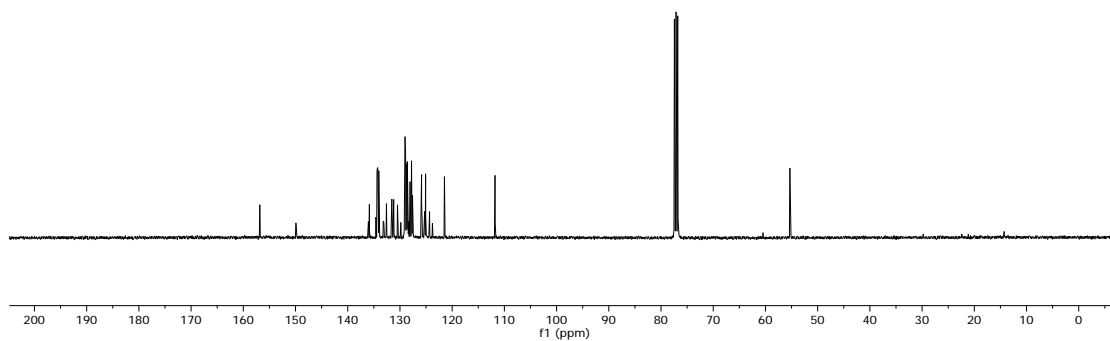

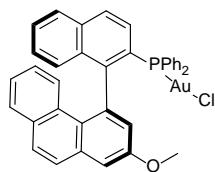

12

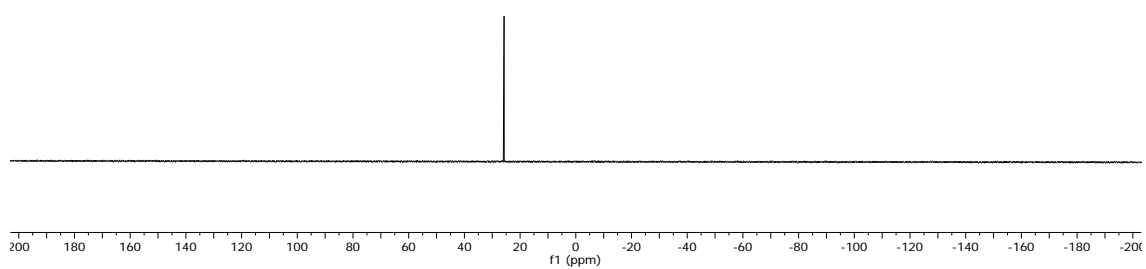

## 9. HPLC spectra

### Compound 4a

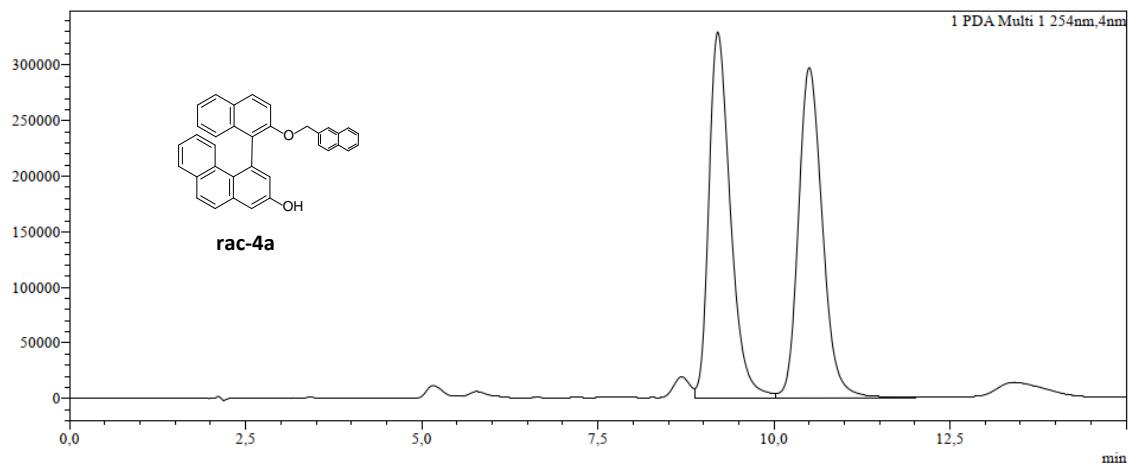

| Peak# | Ret. Time | Area     | Height | Area%   |
|-------|-----------|----------|--------|---------|
| 1     | 9.204     | 7008378  | 329294 | 49.849  |
| 2     | 10.503    | 7050869  | 297180 | 50.151  |
| Total |           | 14059247 | 626474 | 100.000 |

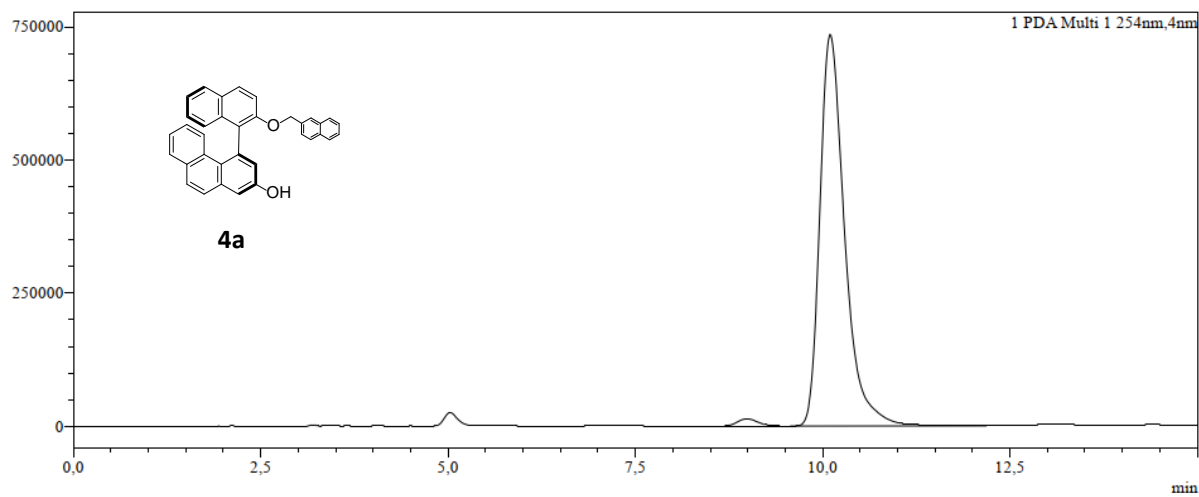

| Peak# | Ret. Time | Area     | Height | Area%   |
|-------|-----------|----------|--------|---------|
| 1     | 8.990     | 265630   | 13803  | 1.545   |
| 2     | 10.102    | 16928078 | 735185 | 98.455  |
| Total |           | 17193708 | 748988 | 100.000 |

## Compound 4b

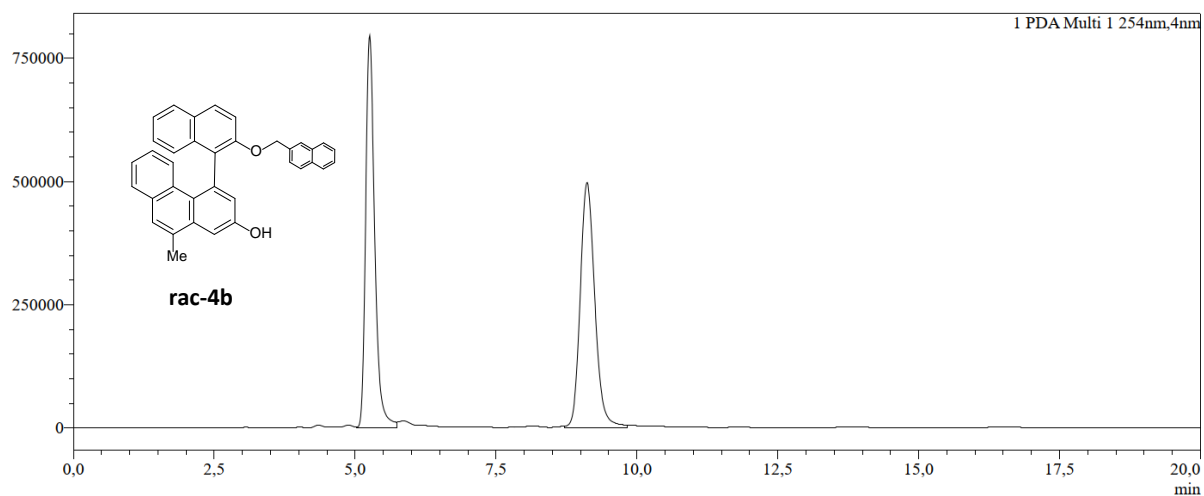

PDA Ch1 254nm

| Peak# | Ret. Time | Area     | Height  | Area%   |
|-------|-----------|----------|---------|---------|
| 1     | 5.256     | 8914551  | 796540  | 49.723  |
| 2     | 9.115     | 9013744  | 497831  | 50.277  |
| Total |           | 17928296 | 1294371 | 100.000 |

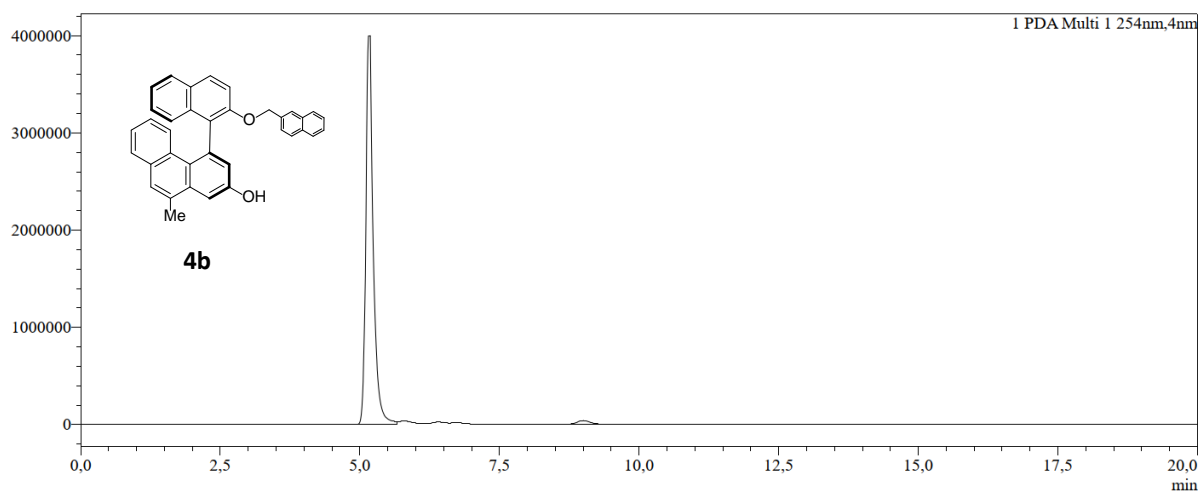

PDA Ch1 254nm

| Peak# | Ret. Time | Area     | Height  | Area%   |
|-------|-----------|----------|---------|---------|
| 1     | 5.168     | 36856530 | 3998240 | 98.209  |
| 2     | 9.004     | 672187   | 38305   | 1.791   |
| Total |           | 37528717 | 4036546 | 100.000 |

## Compound 4c

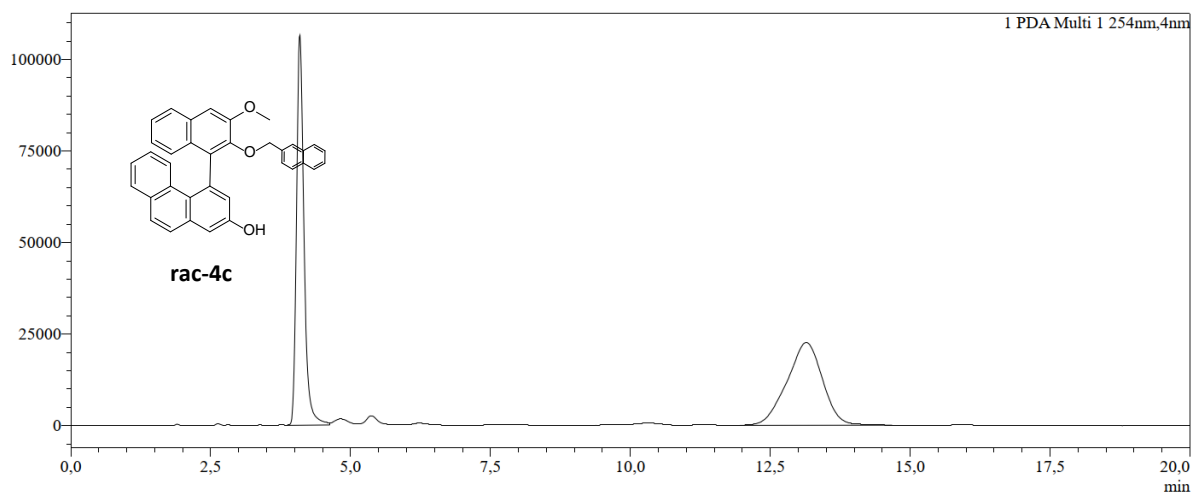

PDA Ch1 254nm

| Peak# | Ret. Time | Area    | Height | Area%   |
|-------|-----------|---------|--------|---------|
| 1     | 4.092     | 990111  | 106453 | 49.787  |
| 2     | 13.143    | 998589  | 22590  | 50.213  |
| Total |           | 1988700 | 129042 | 100.000 |

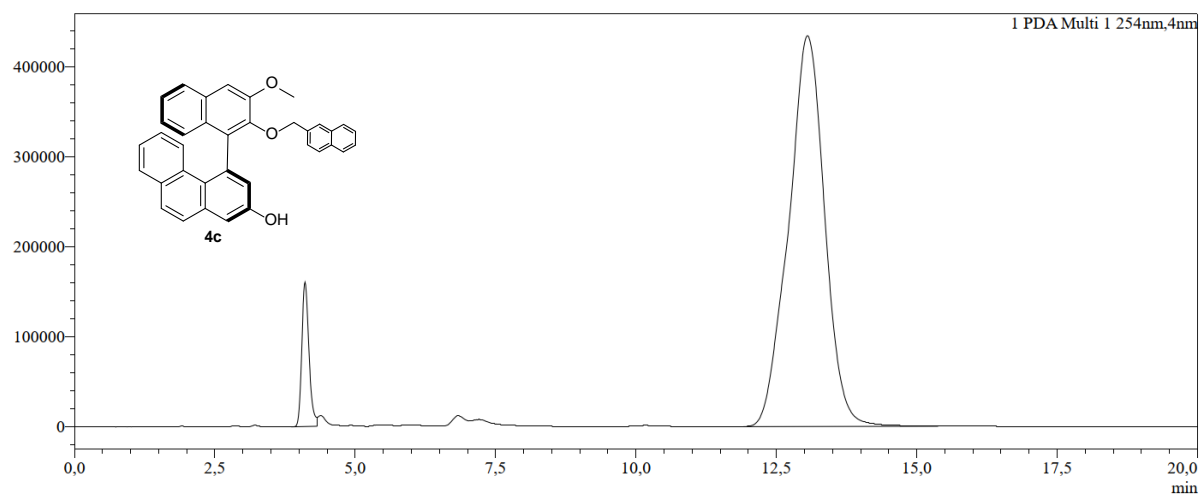

PDA Ch1 254nm

| Peak# | Ret. Time | Area     | Height | Area%   |
|-------|-----------|----------|--------|---------|
| 1     | 4.106     | 1429489  | 160376 | 6.869   |
| 2     | 13.055    | 19381015 | 433636 | 93.131  |
| Total |           | 20810504 | 594012 | 100.000 |

## Compound 4d

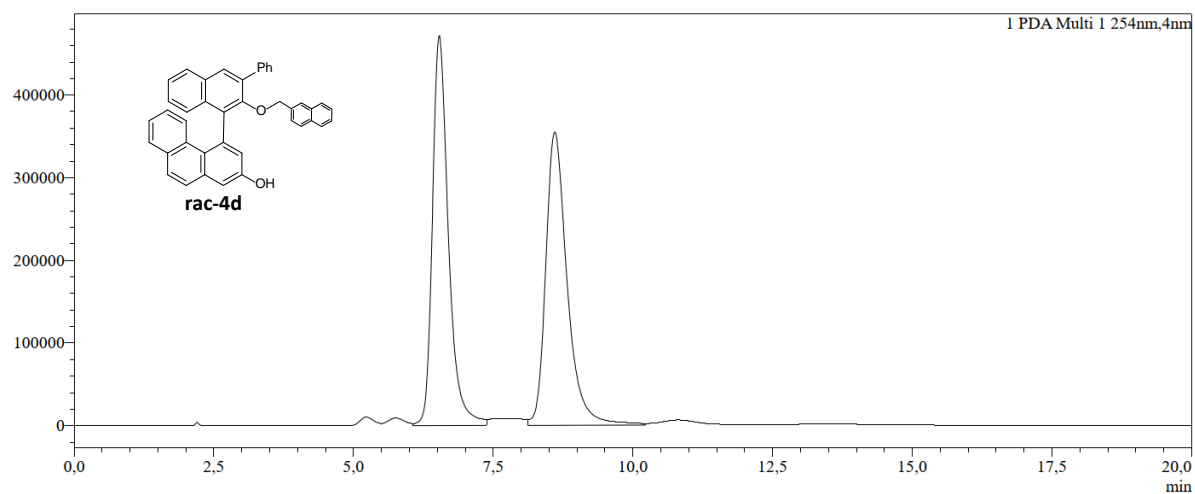

PDA Ch1 254nm

| Peak#        | Ret. Time | Area            | Height        | Area%          |
|--------------|-----------|-----------------|---------------|----------------|
| 1            | 6.534     | 9394965         | 471668        | 49.743         |
| 2            | 8.602     | 9492233         | 354739        | 50.257         |
| <b>Total</b> |           | <b>18887199</b> | <b>826407</b> | <b>100.000</b> |

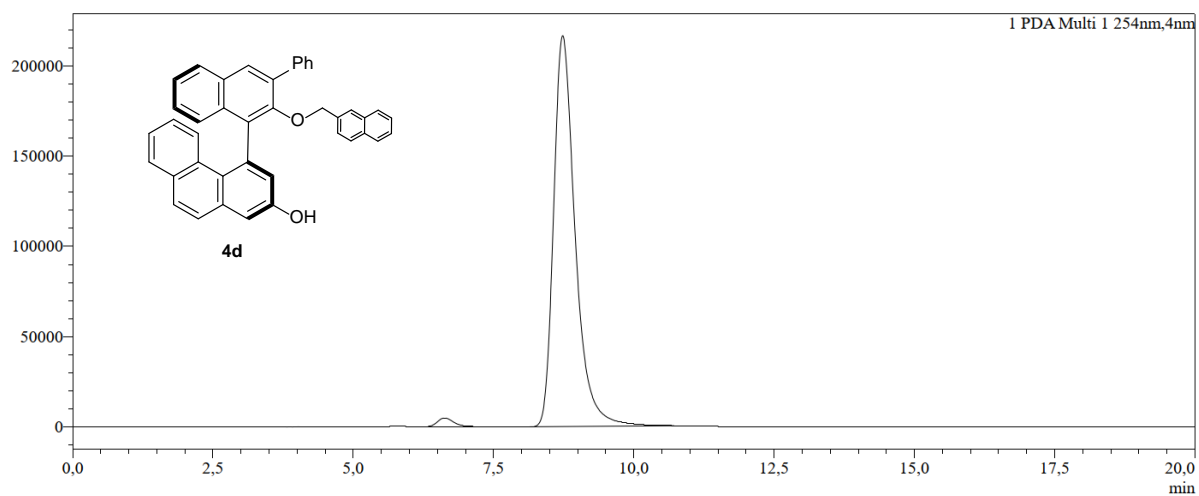

PDA Ch1 254nm

| Peak#        | Ret. Time | Area           | Height        | Area%          |
|--------------|-----------|----------------|---------------|----------------|
| 1            | 6.628     | 103213         | 4963          | 1.757          |
| 2            | 8.732     | 5771450        | 216383        | 98.243         |
| <b>Total</b> |           | <b>5874663</b> | <b>221346</b> | <b>100.000</b> |

## Compound 4e

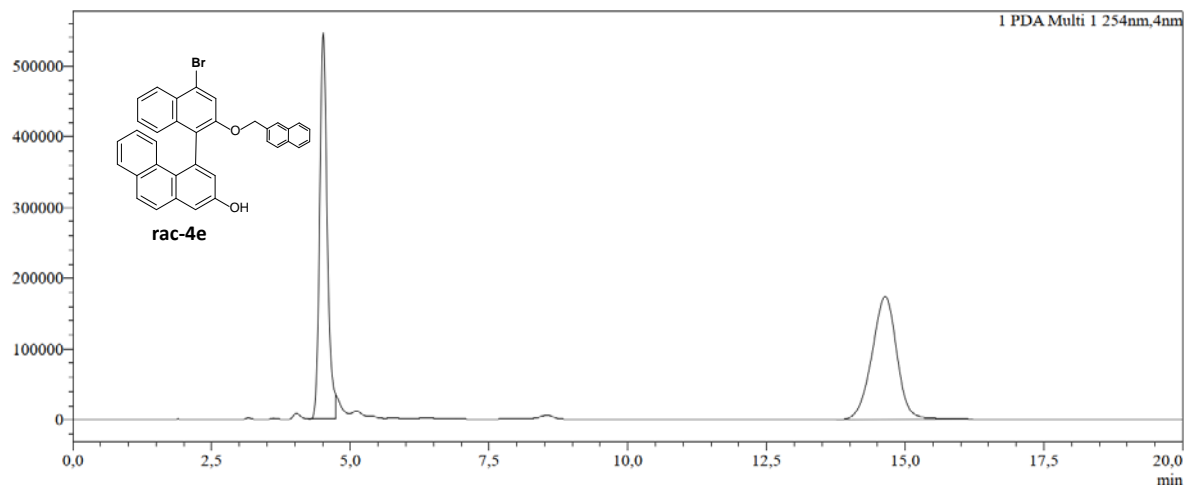

PDA Ch1 254nm

| Peak# | Ret. Time | Area     | Height | Area%   |
|-------|-----------|----------|--------|---------|
| 1     | 4.511     | 5196519  | 545894 | 48.787  |
| 2     | 14.641    | 5454918  | 174097 | 51.213  |
| Total |           | 10651437 | 719991 | 100.000 |

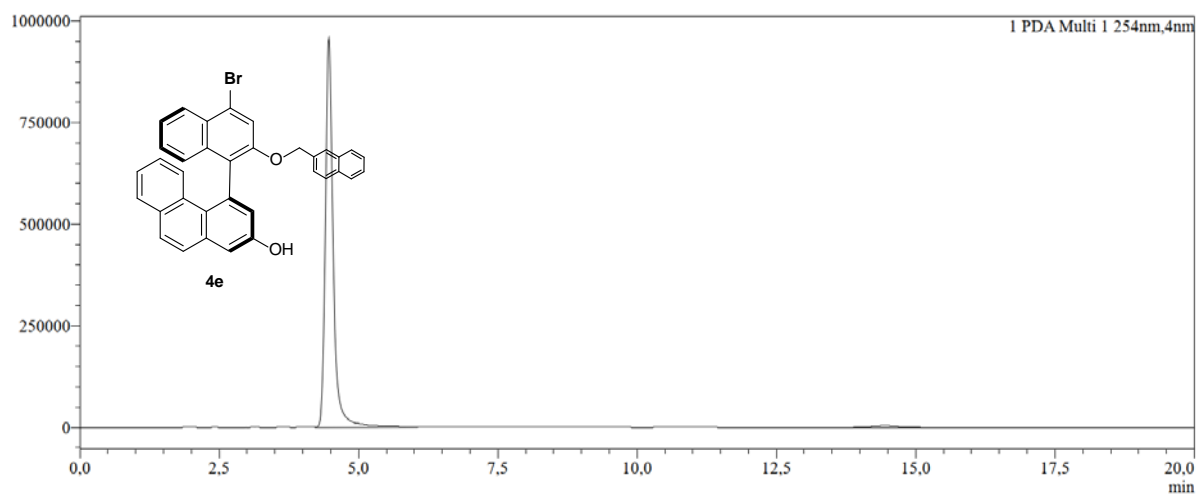

PDA Ch1 254nm

| Peak# | Ret. Time | Area    | Height | Area%   |
|-------|-----------|---------|--------|---------|
| 1     | 4.467     | 9441788 | 957531 | 98.601  |
| 2     | 14.449    | 133923  | 4551   | 1.399   |
| Total |           | 9575711 | 962083 | 100.000 |



## Compound 4f

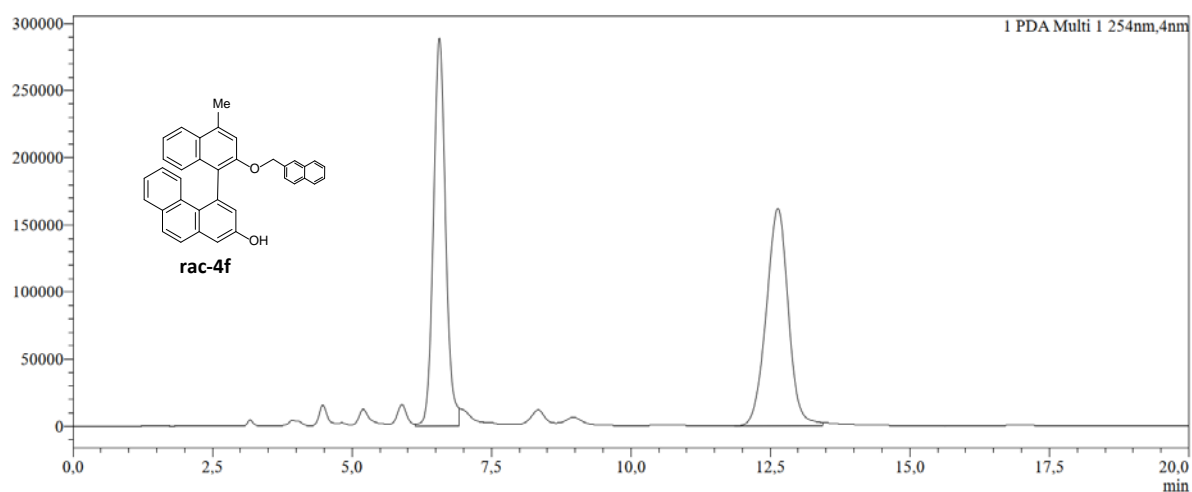

PDA Ch1 254nm

| Peak# | Ret. Time | Area    | Height | Area%   |
|-------|-----------|---------|--------|---------|
| 1     | 6,567     | 4378153 | 289019 | 49,571  |
| 2     | 12,634    | 4453915 | 161843 | 50,429  |
| Total |           | 8832068 | 450862 | 100,000 |

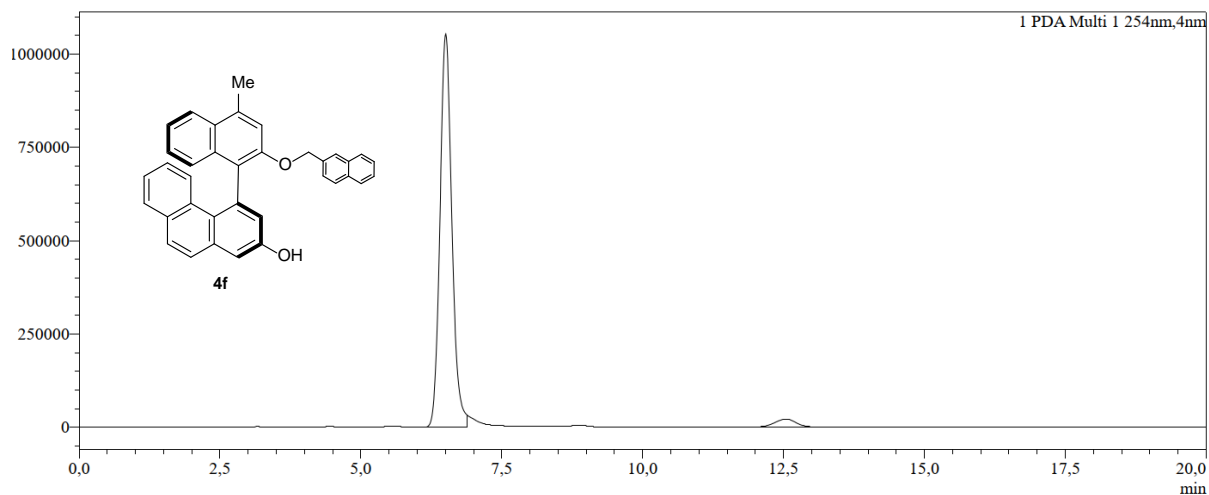

PDA Ch1 254nm

| Peak# | Ret. Time | Area     | Height  | Area%   |
|-------|-----------|----------|---------|---------|
| 1     | 6,505     | 15462666 | 1053034 | 96,308  |
| 2     | 12,541    | 592783   | 21936   | 3,692   |
| Total |           | 16055448 | 1074971 | 100,000 |

## Compound 4g

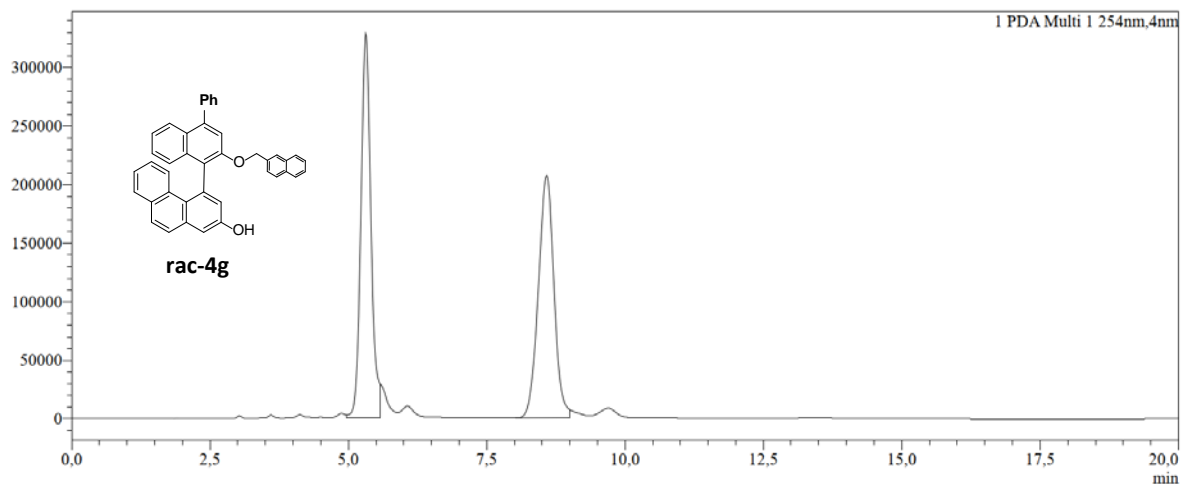

PDA Ch1 254nm

| Peak# | Ret. Time | Area    | Height | Area%   |
|-------|-----------|---------|--------|---------|
| 1     | 5,314     | 4159575 | 328523 | 50,589  |
| 2     | 8,582     | 4062749 | 206850 | 49,411  |
| Total |           | 8222325 | 535373 | 100,000 |

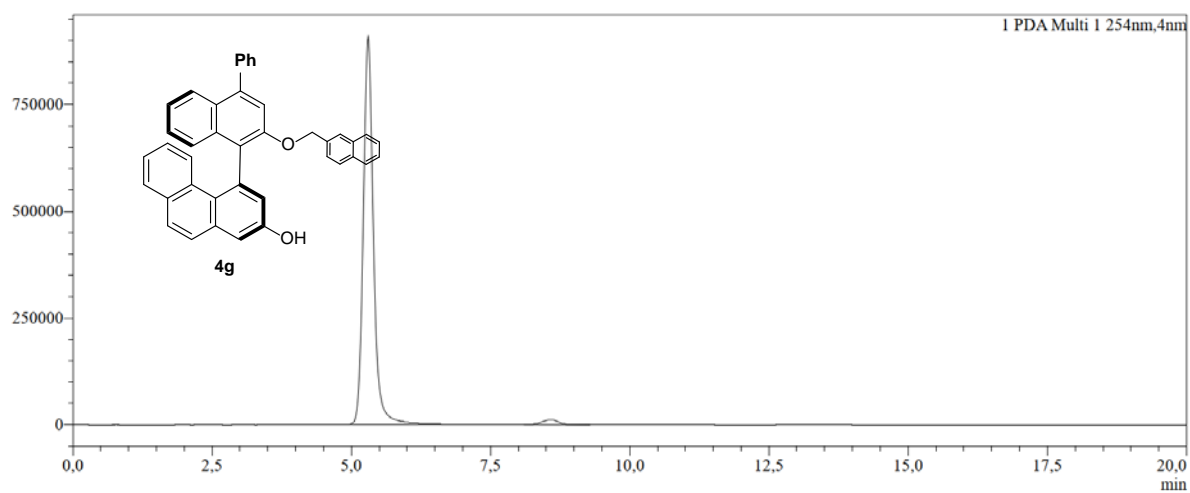

PDA Ch1 254nm

| Peak# | Ret. Time | Area     | Height | Area%   |
|-------|-----------|----------|--------|---------|
| 1     | 5,301     | 11509046 | 907581 | 97,978  |
| 2     | 8,579     | 237479   | 11801  | 2,022   |
| Total |           | 11746526 | 919382 | 100,000 |

## Compound 4h

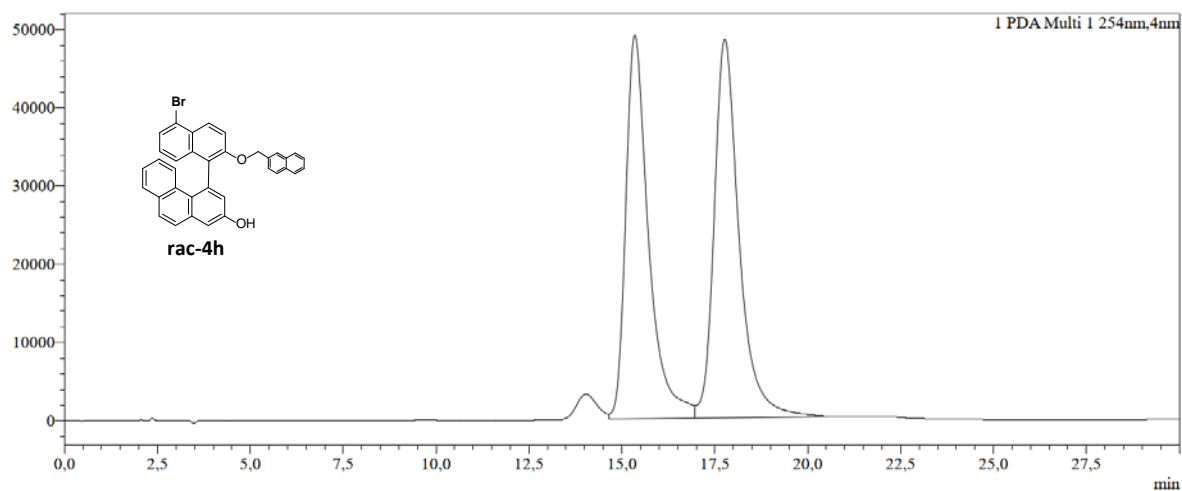

PDA Ch1 254nm

| Peak#        | Ret. Time | Area           | Height       | Area%          |
|--------------|-----------|----------------|--------------|----------------|
| 1            | 15.348    | 2099921        | 49056        | 48.233         |
| 2            | 17.770    | 2253750        | 48423        | 51.767         |
| <b>Total</b> |           | <b>4353671</b> | <b>97478</b> | <b>100.000</b> |

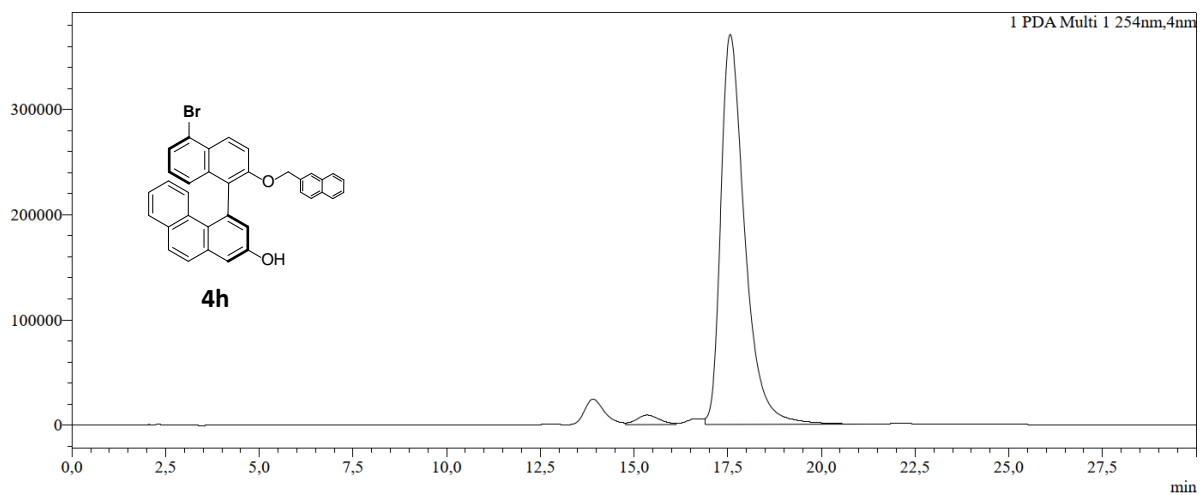

PDA Ch1 254nm

| Peak#        | Ret. Time | Area            | Height        | Area%          |
|--------------|-----------|-----------------|---------------|----------------|
| 1            | 15.350    | 390070          | 9071          | 2.310          |
| 2            | 17.567    | 16498605        | 370662        | 97.690         |
| <b>Total</b> |           | <b>16888675</b> | <b>379733</b> | <b>100.000</b> |

## Compound 4i

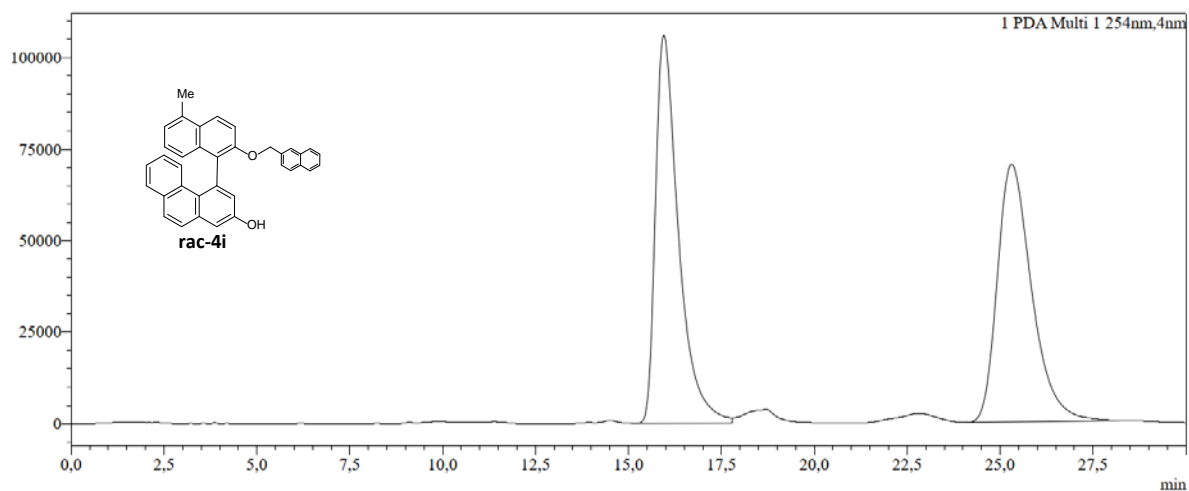

PDA Ch1 254nm

| Peak# | Ret. Time | Area    | Height | Area%   |
|-------|-----------|---------|--------|---------|
| 1     | 15.952    | 4595306 | 105984 | 50.380  |
| 2     | 25.312    | 4526071 | 70380  | 49.620  |
| Total |           | 9121376 | 176363 | 100.000 |

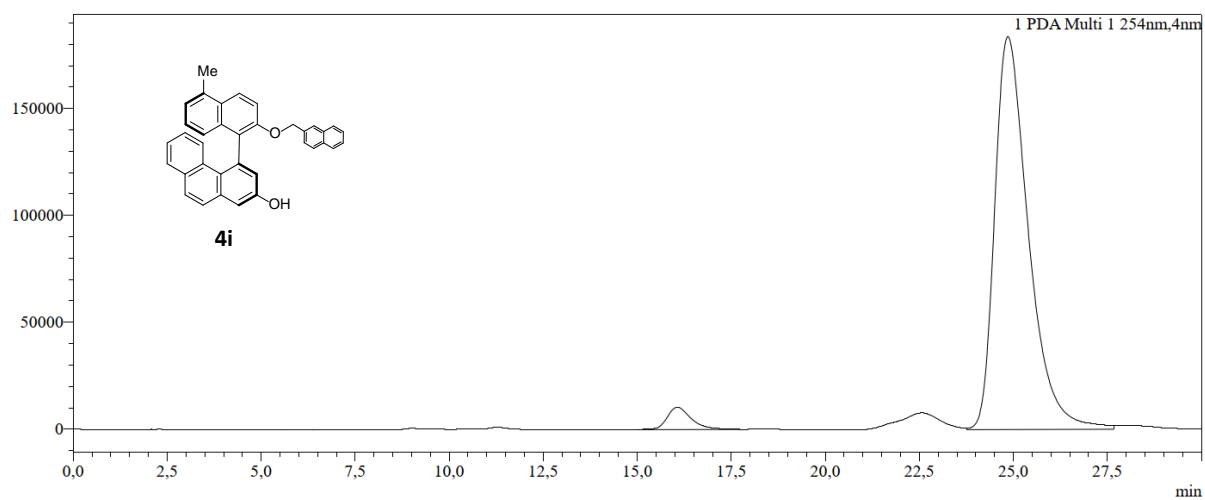

PDA Ch1 254nm

| Peak# | Ret. Time | Area     | Height | Area%   |
|-------|-----------|----------|--------|---------|
| 1     | 16.064    | 468247   | 10437  | 3.921   |
| 2     | 24.856    | 11472483 | 183724 | 96.079  |
| Total |           | 11940730 | 194161 | 100.000 |

## Compound 4j

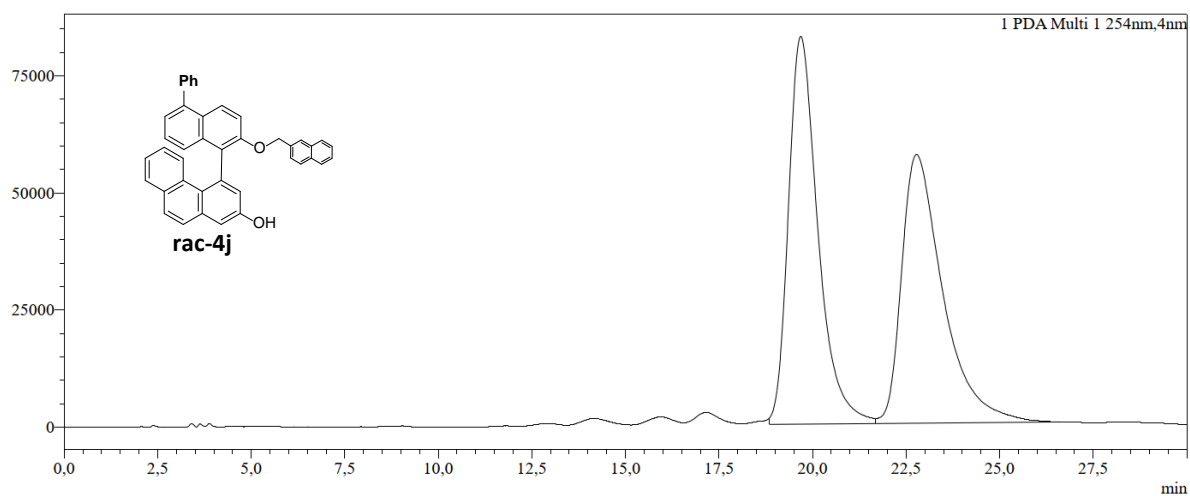

PDA Ch1 254nm

| Peak#        | Ret. Time | Area           | Height        | Area%          |
|--------------|-----------|----------------|---------------|----------------|
| 1            | 19.685    | 4541608        | 82811         | 50.761         |
| 2            | 22.782    | 4405521        | 57385         | 49.239         |
| <b>Total</b> |           | <b>8947130</b> | <b>140195</b> | <b>100.000</b> |

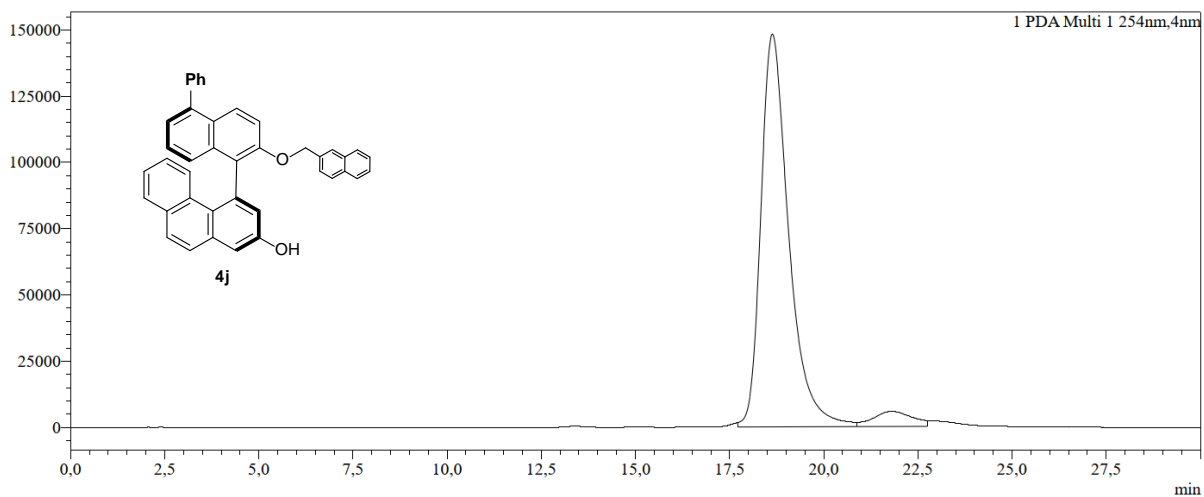

PDA Ch1 254nm

| Peak#        | Ret. Time | Area           | Height        | Area%          |
|--------------|-----------|----------------|---------------|----------------|
| 1            | 18.636    | 7632853        | 148202        | 94.800         |
| 2            | 21.810    | 418673         | 5735          | 5.200          |
| <b>Total</b> |           | <b>8051526</b> | <b>153938</b> | <b>100.000</b> |

## Compound 4k

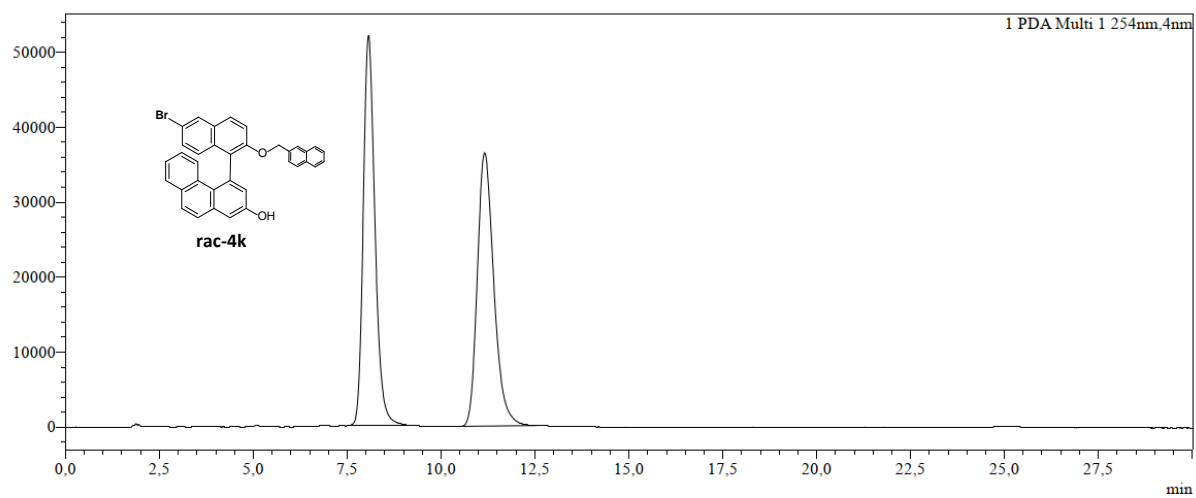

PDA Ch1 254nm

| Peak# | Ret. Time | Area    | Height | Area%   |
|-------|-----------|---------|--------|---------|
| 1     | 8.069     | 1131801 | 52042  | 50.352  |
| 2     | 11.162    | 1115958 | 36468  | 49.648  |
| Total |           | 2247760 | 88510  | 100.000 |

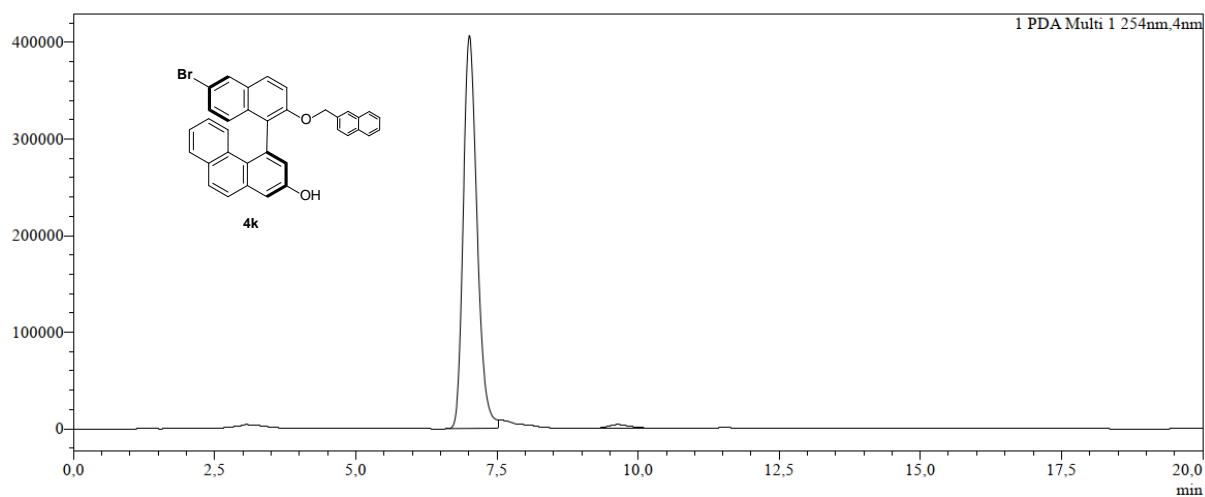

PDA Ch1 254nm

| Peak# | Ret. Time | Area    | Height | Area%   |
|-------|-----------|---------|--------|---------|
| 1     | 7.012     | 6933057 | 406628 | 98.677  |
| 2     | 9.641     | 92952   | 3591   | 1.323   |
| Total |           | 7026008 | 410219 | 100.000 |

# Compound 4l

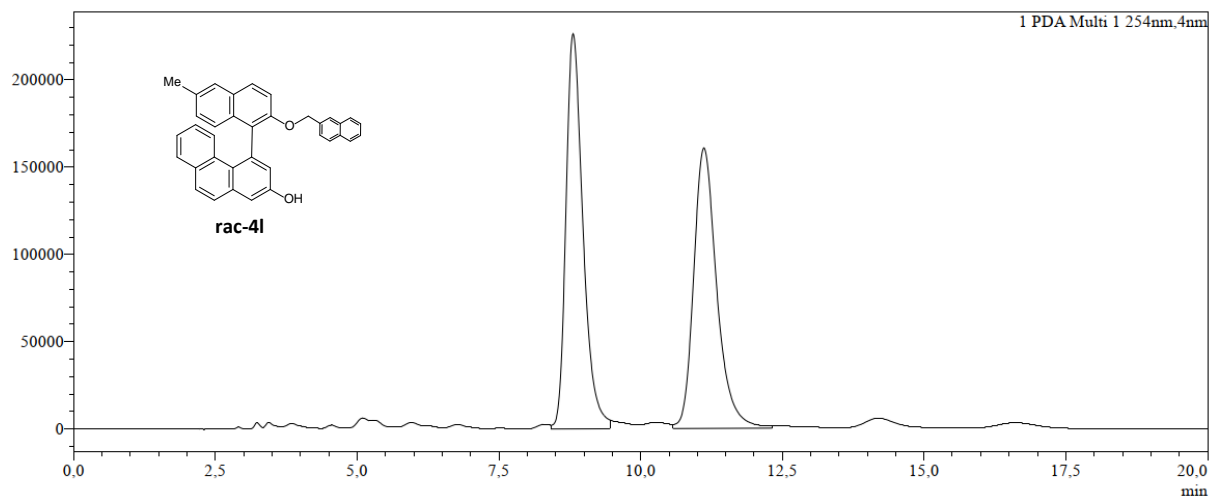

PDA Ch1 254nm

| Peak# | Ret. Time | Area    | Height | Area%   |
|-------|-----------|---------|--------|---------|
| 1     | 8.810     | 4735042 | 226462 | 50.908  |
| 2     | 11.117    | 4566185 | 160775 | 49.092  |
| Total |           | 9301227 | 387238 | 100.000 |

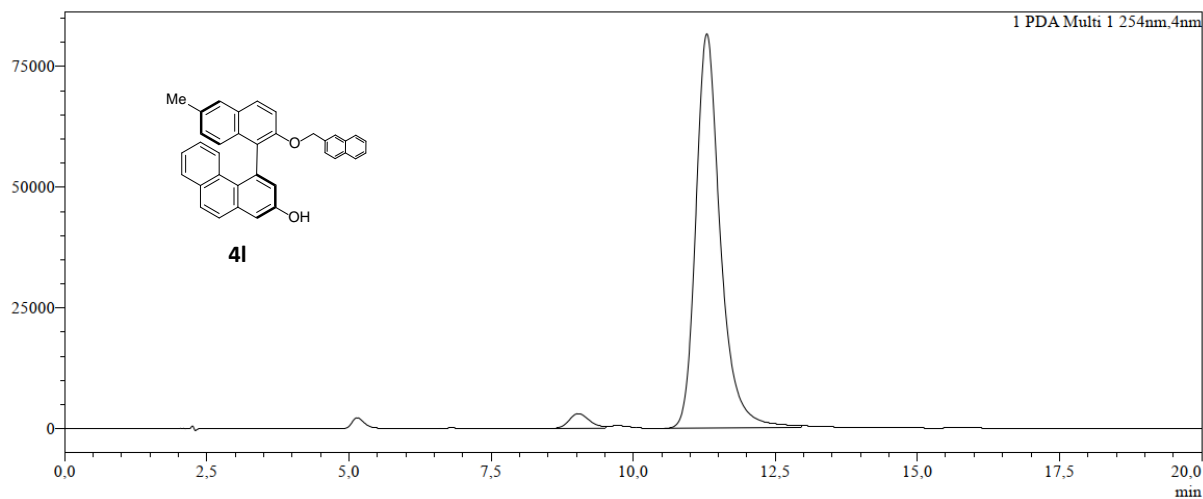

PDA Ch1 254nm

| Peak# | Ret. Time | Area    | Height | Area%   |
|-------|-----------|---------|--------|---------|
| 1     | 9.036     | 77472   | 3083   | 3.061   |
| 2     | 11.297    | 2453436 | 81667  | 96.939  |
| Total |           | 2530908 | 84750  | 100.000 |

## Compound 4m

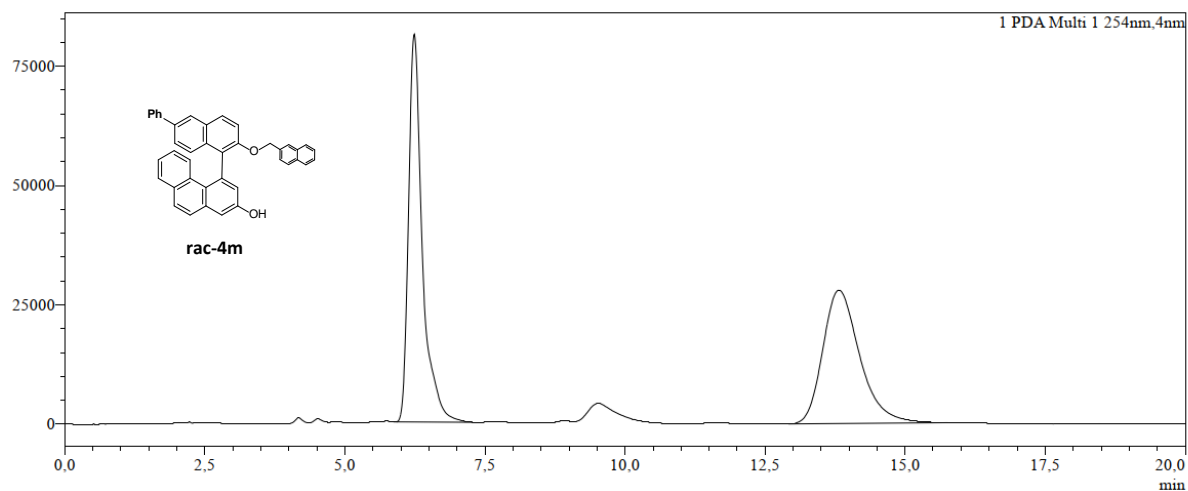

| PDA Ch1 254nm |           |                |               |                |
|---------------|-----------|----------------|---------------|----------------|
| Peak#         | Ret. Time | Area           | Height        | Area%          |
| 1             | 6.238     | 1390886        | 81224         | 52.035         |
| 2             | 13.820    | 1282090        | 27971         | 47.965         |
| <b>Total</b>  |           | <b>2672976</b> | <b>109196</b> | <b>100.000</b> |

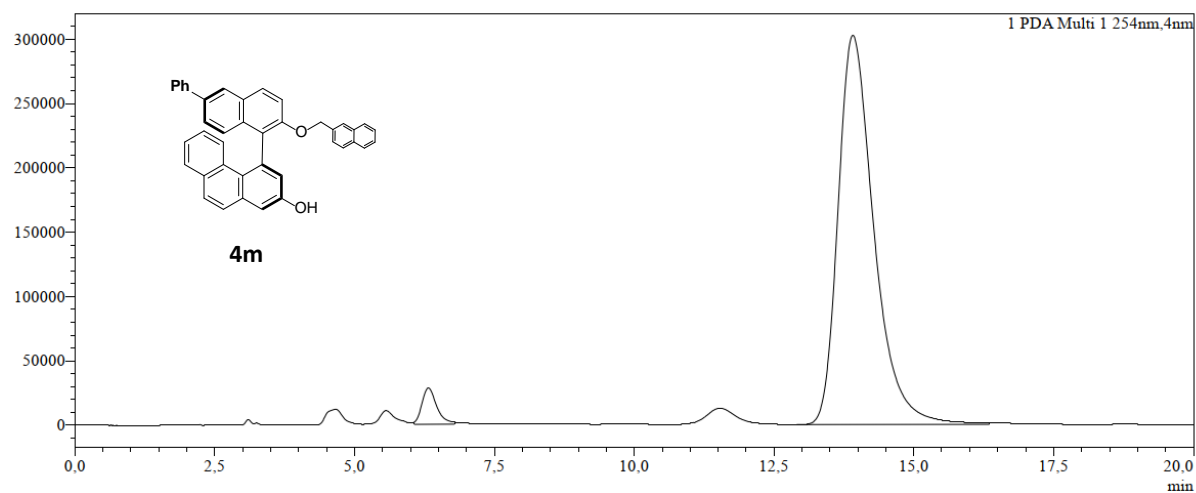

| PDA Ch1 254nm |           |                 |               |                |
|---------------|-----------|-----------------|---------------|----------------|
| Peak#         | Ret. Time | Area            | Height        | Area%          |
| 1             | 6.319     | 520968          | 28211         | 3.718          |
| 2             | 13.912    | 13492046        | 302389        | 96.282         |
| <b>Total</b>  |           | <b>14013014</b> | <b>330600</b> | <b>100.000</b> |



## Compound 4n

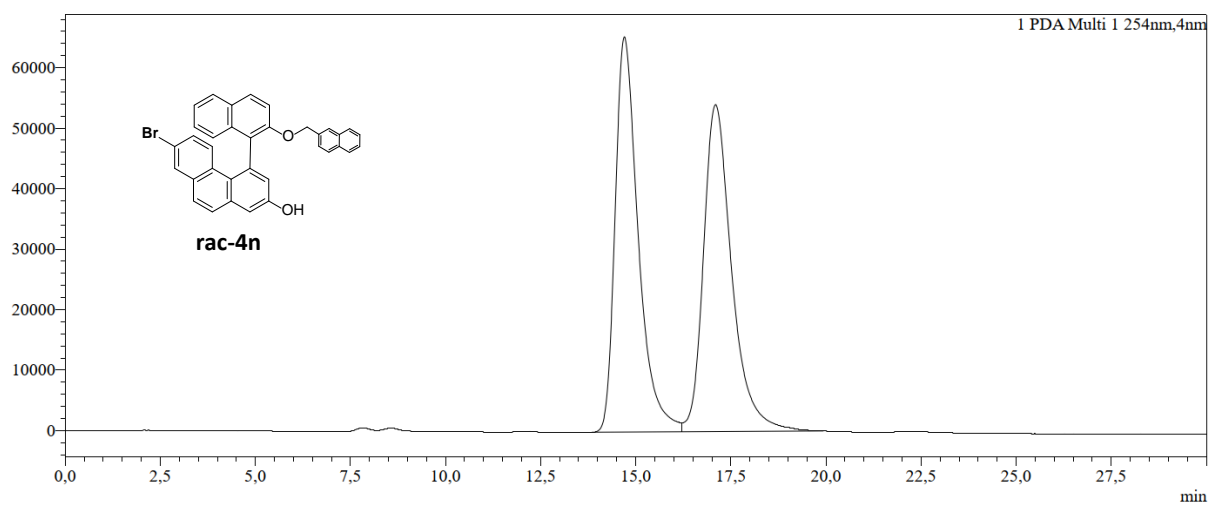

PDA Ch1 254nm

| Peak# | Ret. Time | Area    | Height | Area%   |
|-------|-----------|---------|--------|---------|
| 1     | 14.701    | 2760584 | 65313  | 49.700  |
| 2     | 17.099    | 2793962 | 54040  | 50.300  |
| Total |           | 5554546 | 119353 | 100.000 |

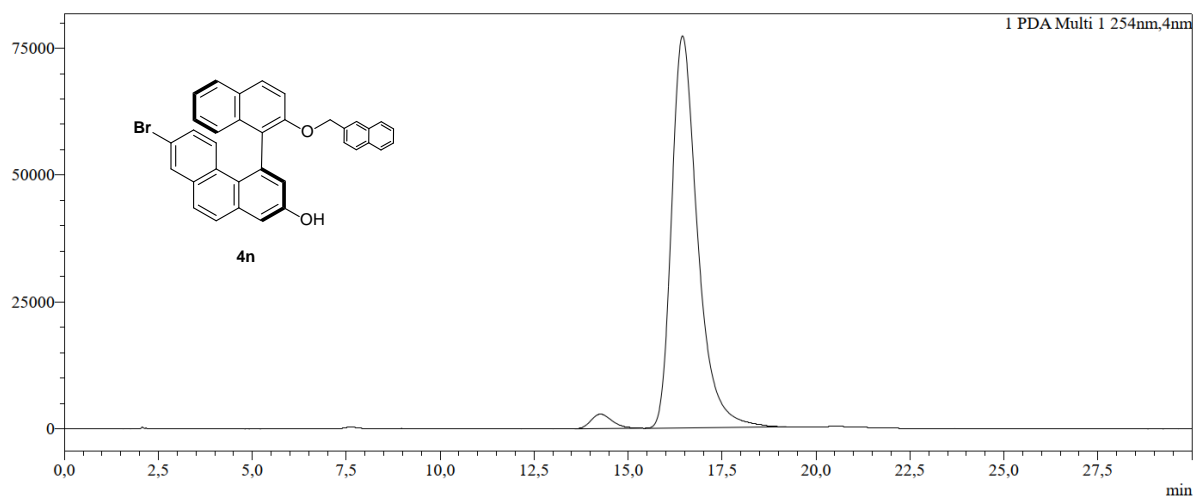

PDA Ch1 254nm

| Peak# | Ret. Time | Area    | Height | Area%   |
|-------|-----------|---------|--------|---------|
| 1     | 14.264    | 113163  | 2851   | 2.955   |
| 2     | 16.449    | 3716234 | 77260  | 97.045  |
| Total |           | 3829398 | 80111  | 100.000 |

## Compound 4o

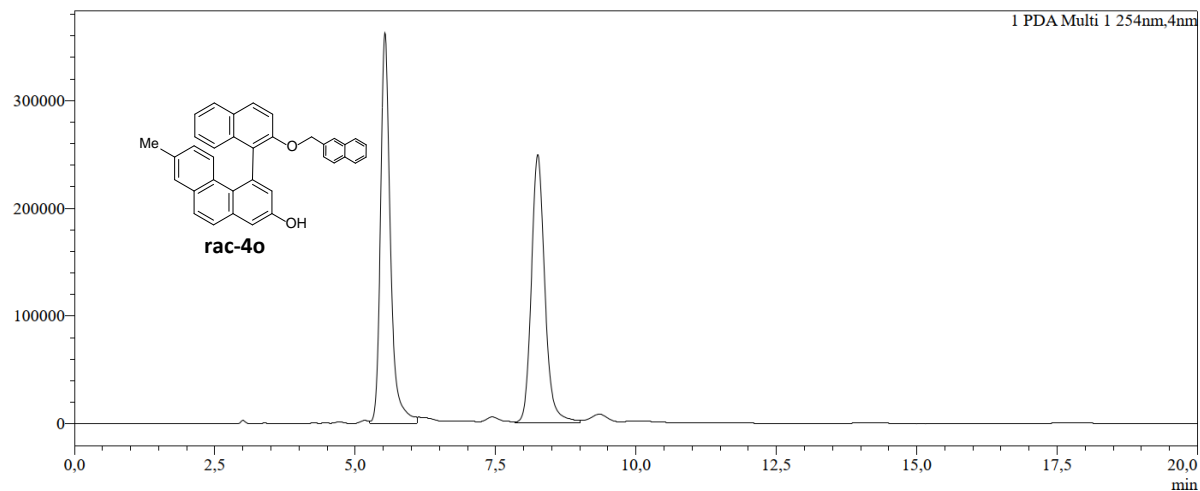

PDA Ch1 254nm

| Peak# | Ret. Time | Area    | Height | Area%   |
|-------|-----------|---------|--------|---------|
| 1     | 5.529     | 4447970 | 362306 | 51.510  |
| 2     | 8.251     | 4187161 | 248977 | 48.490  |
| Total |           | 8635131 | 611283 | 100.000 |

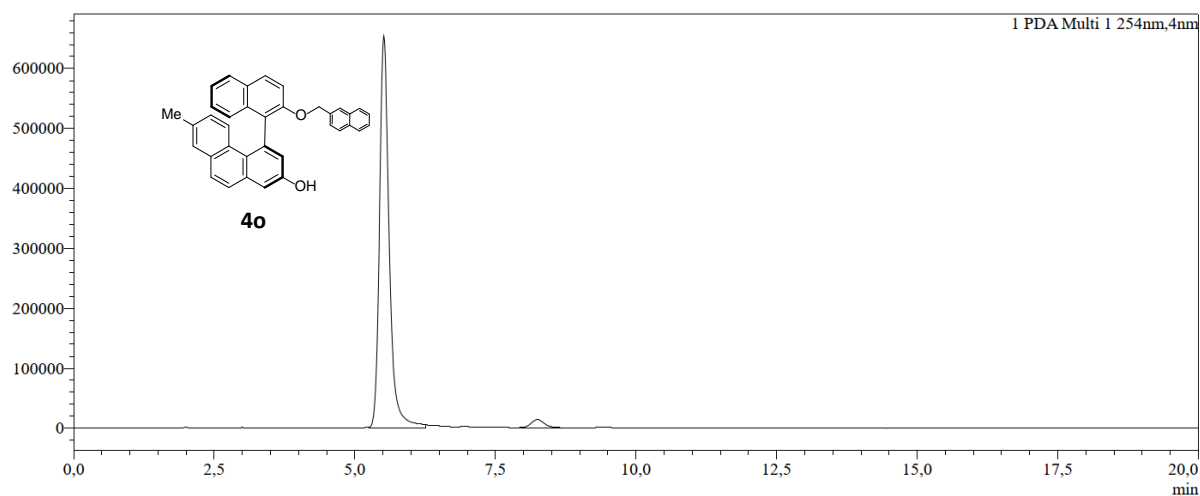

PDA Ch1 254nm

| Peak# | Ret. Time | Area    | Height | Area%   |
|-------|-----------|---------|--------|---------|
| 1     | 5.515     | 7911911 | 653883 | 96.972  |
| 2     | 8.246     | 247027  | 13984  | 3.028   |
| Total |           | 8158938 | 667868 | 100.000 |

## Compound 4p

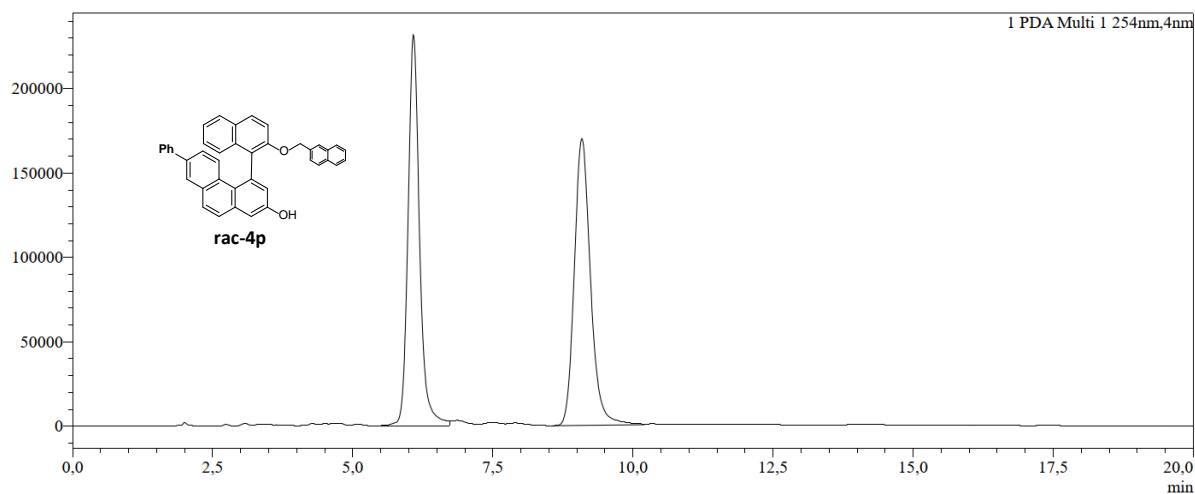

PDA Ch1 254nm

| Peak# | Ret. Time | Area    | Height | Area%   |
|-------|-----------|---------|--------|---------|
| 1     | 6.083     | 3316874 | 231491 | 49.180  |
| 2     | 9.089     | 3427456 | 169840 | 50.820  |
| Total |           | 6744331 | 401331 | 100.000 |

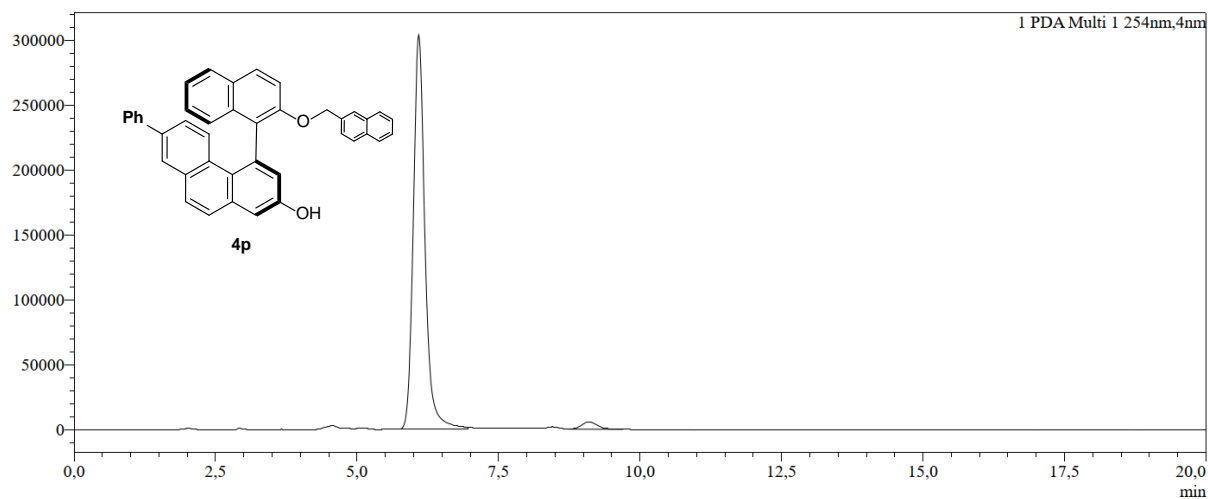

PDA Ch1 254nm

| Peak# | Ret. Time | Area    | Height | Area%   |
|-------|-----------|---------|--------|---------|
| 1     | 6.090     | 4349408 | 303463 | 97.478  |
| 2     | 9.097     | 112540  | 5646   | 2.522   |
| Total |           | 4461947 | 309109 | 100.000 |

## Compound 4q

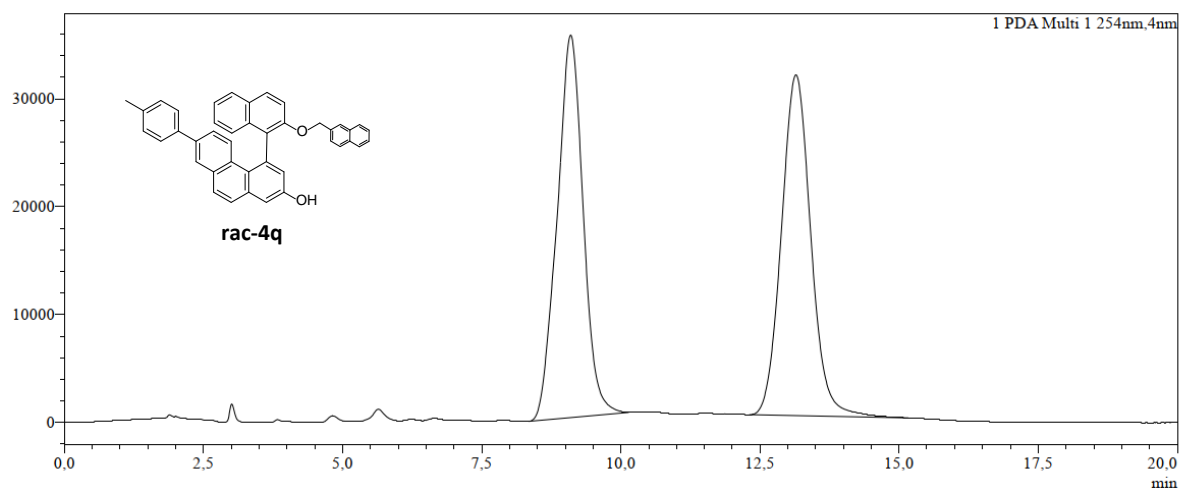

| Peak#        | Ret. Time | Area           | Height       | Area%          |
|--------------|-----------|----------------|--------------|----------------|
| 1            | 9.099     | 1154477        | 35464        | 49.850         |
| 2            | 13.147    | 1161404        | 31581        | 50.150         |
| <b>Total</b> |           | <b>2315881</b> | <b>67045</b> | <b>100.000</b> |

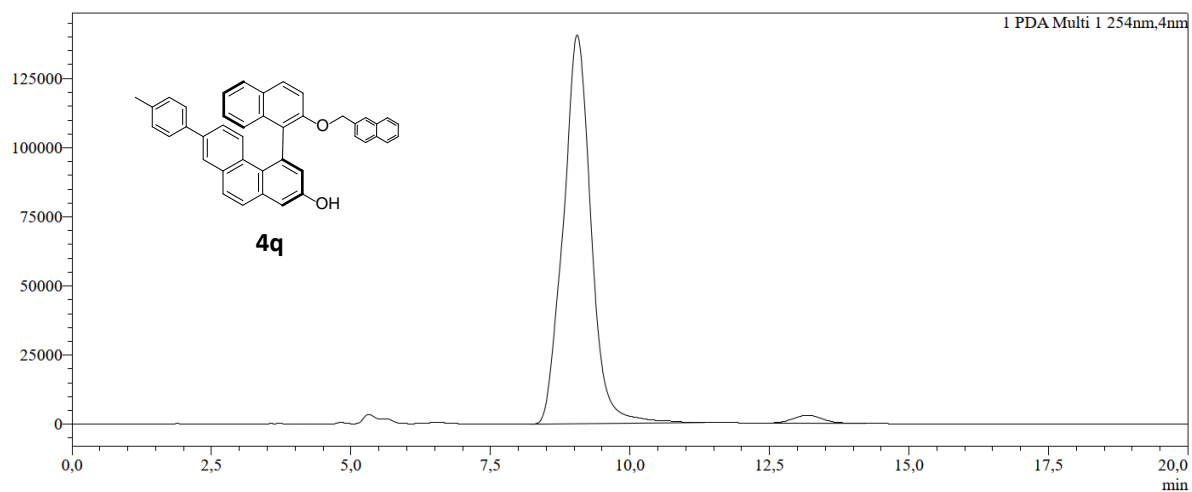

| Peak#        | Ret. Time | Area           | Height        | Area%          |
|--------------|-----------|----------------|---------------|----------------|
| 1            | 9.053     | 4862394        | 140539        | 97.834         |
| 2            | 13.183    | 107629         | 2905          | 2.166          |
| <b>Total</b> |           | <b>4970023</b> | <b>143443</b> | <b>100.000</b> |

## Compound 4r

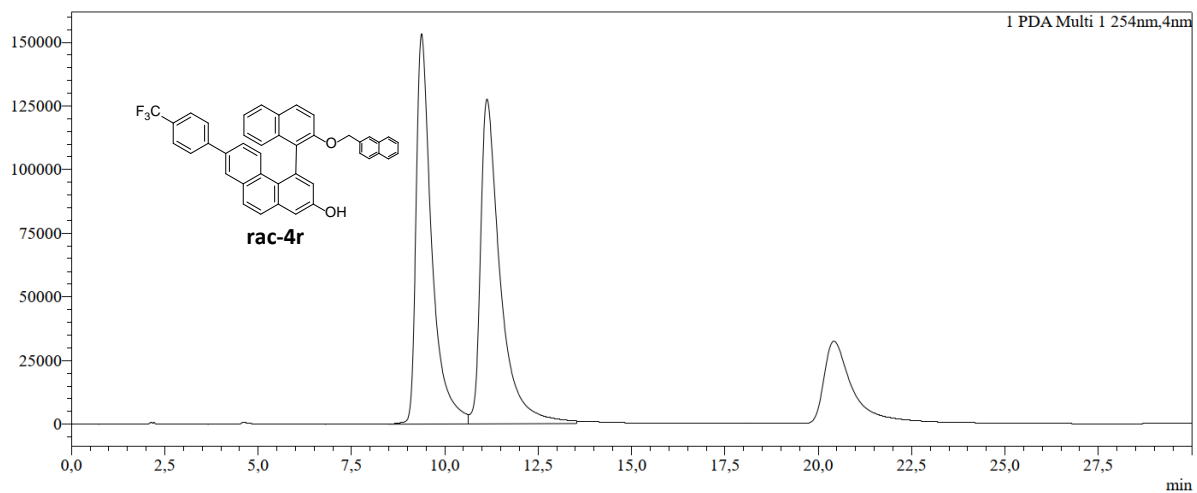

PDA Ch1 254nm

| Peak# | Ret. Time | Area    | Height | Area%   |
|-------|-----------|---------|--------|---------|
| 1     | 9.377     | 4476808 | 153209 | 48.864  |
| 2     | 11.130    | 4685003 | 127476 | 51.136  |
| Total |           | 9161811 | 280685 | 100.000 |

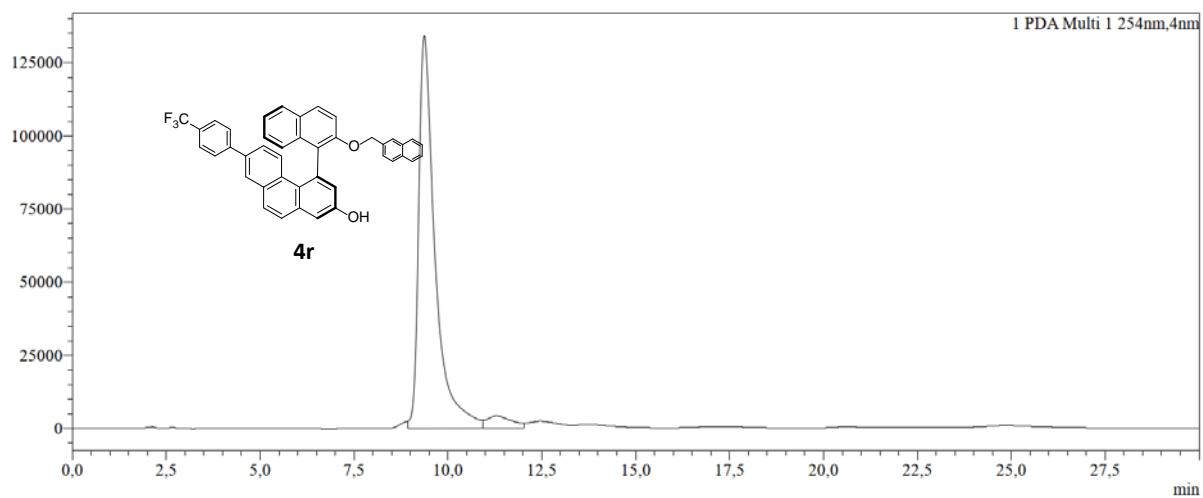

PDA Ch1 254nm

| Peak# | Ret. Time | Area    | Height | Area%   |
|-------|-----------|---------|--------|---------|
| 1     | 9.371     | 4074236 | 134307 | 95.184  |
| 2     | 11.296    | 206152  | 4325   | 4.816   |
| Total |           | 4280389 | 138632 | 100.000 |

## Compound 4s

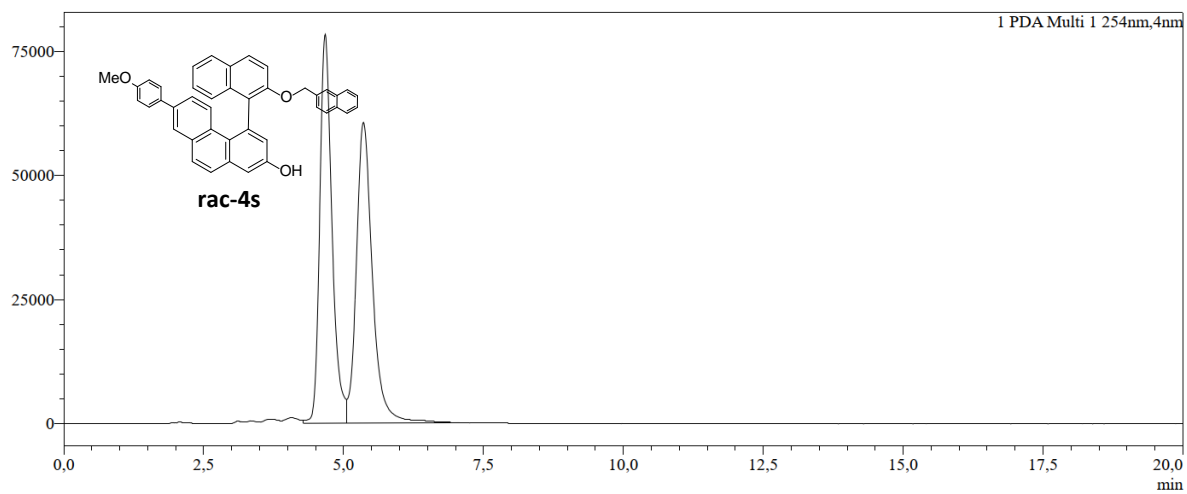

PDA Ch1 254nm

| Peak# | Ret. Time | Area    | Height | Area%   |
|-------|-----------|---------|--------|---------|
| 1     | 4.670     | 1192996 | 78321  | 49.624  |
| 2     | 5.355     | 1211090 | 60566  | 50.376  |
| Total |           | 2404086 | 138886 | 100.000 |

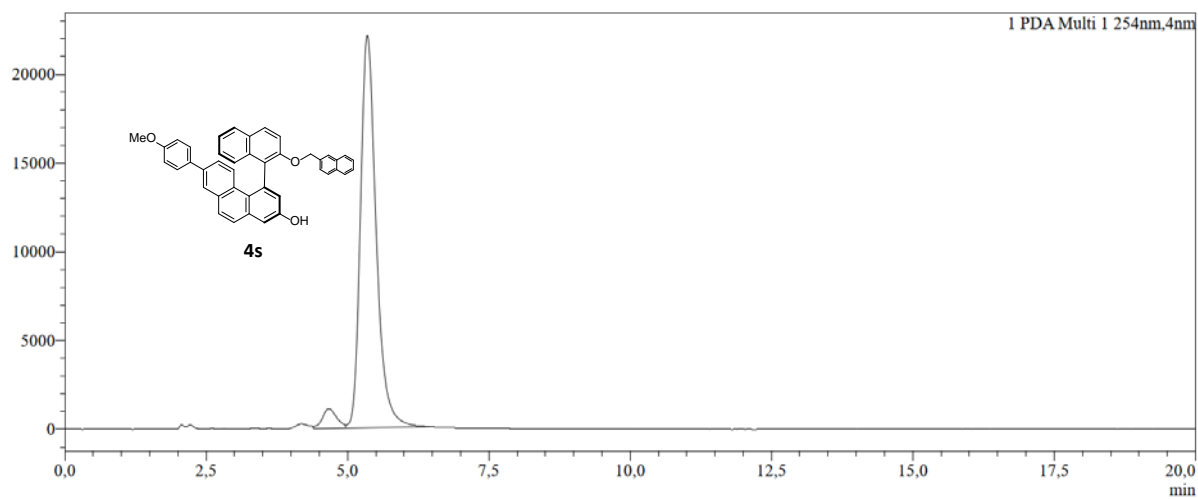

PDA Ch1 254nm

| Peak# | Ret. Time | Area   | Height | Area%   |
|-------|-----------|--------|--------|---------|
| 1     | 4.670     | 19898  | 1124   | 4.444   |
| 2     | 5.350     | 427875 | 22099  | 95.556  |
| Total |           | 447773 | 23223  | 100.000 |

## Compound 4t

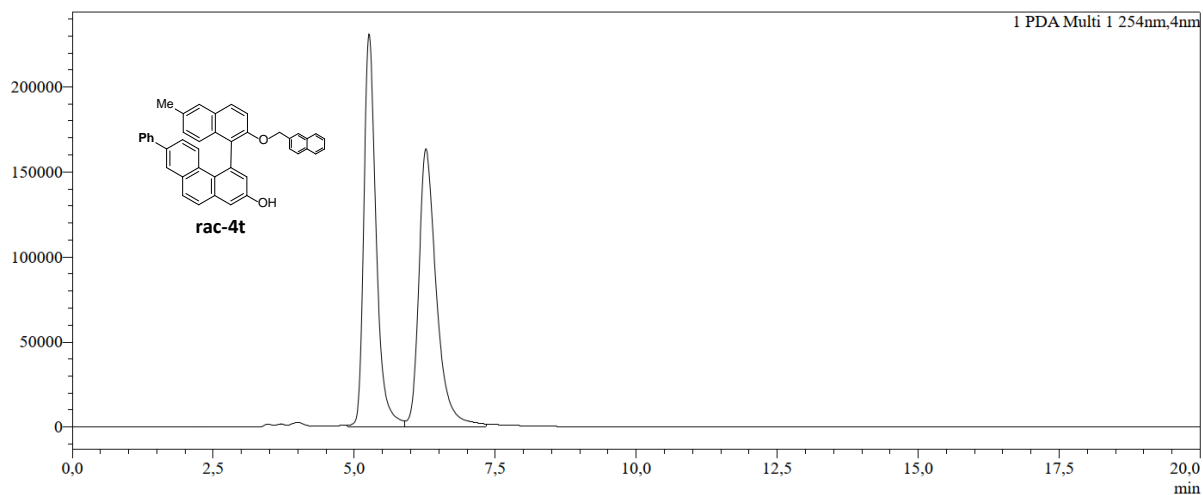

PDA Ch1 254nm

| Peak# | Ret. Time | Area    | Height | Area%   |
|-------|-----------|---------|--------|---------|
| 1     | 5.262     | 3538287 | 230939 | 49.987  |
| 2     | 6.270     | 3540128 | 163477 | 50.013  |
| Total |           | 7078415 | 394416 | 100.000 |

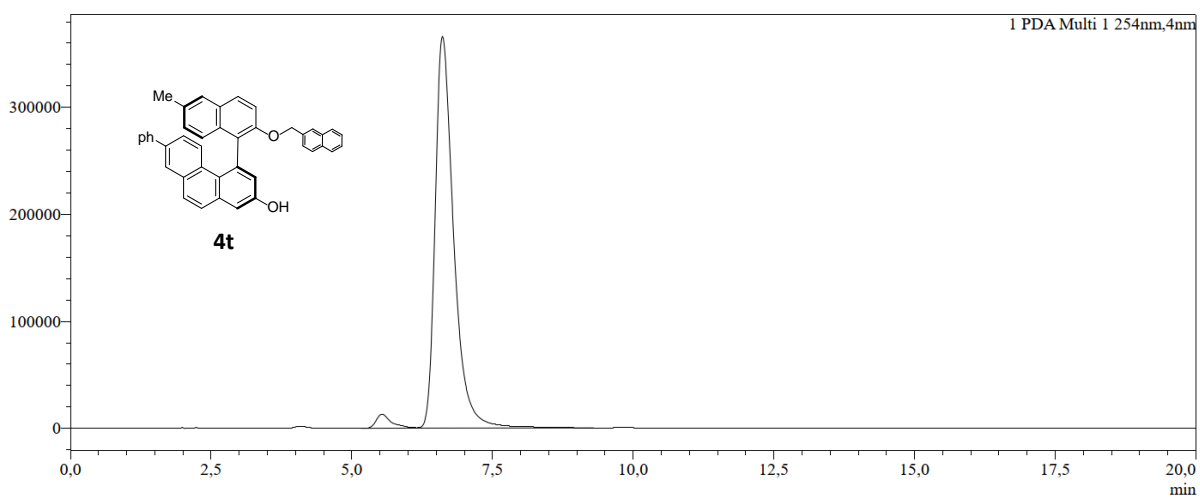

PDA Ch1 254nm

| Peak# | Ret. Time | Area    | Height | Area%   |
|-------|-----------|---------|--------|---------|
| 1     | 5.537     | 247151  | 13152  | 2.864   |
| 2     | 6.611     | 8381381 | 366018 | 97.136  |
| Total |           | 8628532 | 379169 | 100.000 |

# Compound 4u

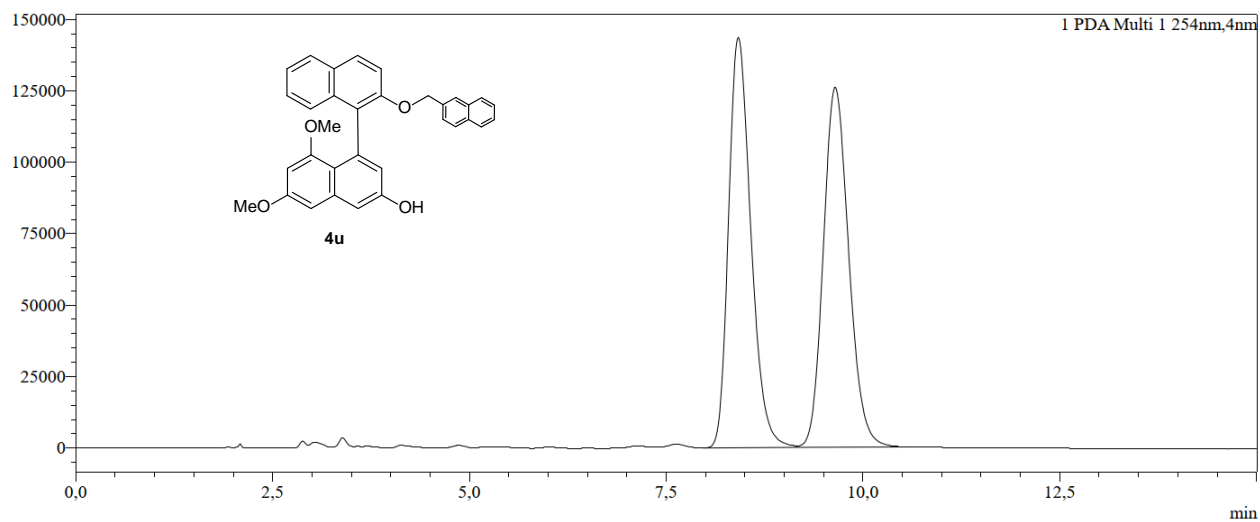

PDA Ch1 254nm

| Peak# | Ret. Time | Area    | Height | Area%   |
|-------|-----------|---------|--------|---------|
| 1     | 8.417     | 2833009 | 143672 | 49.986  |
| 2     | 9.648     | 2834559 | 126002 | 50.014  |
| Total |           | 5667568 | 269673 | 100.000 |

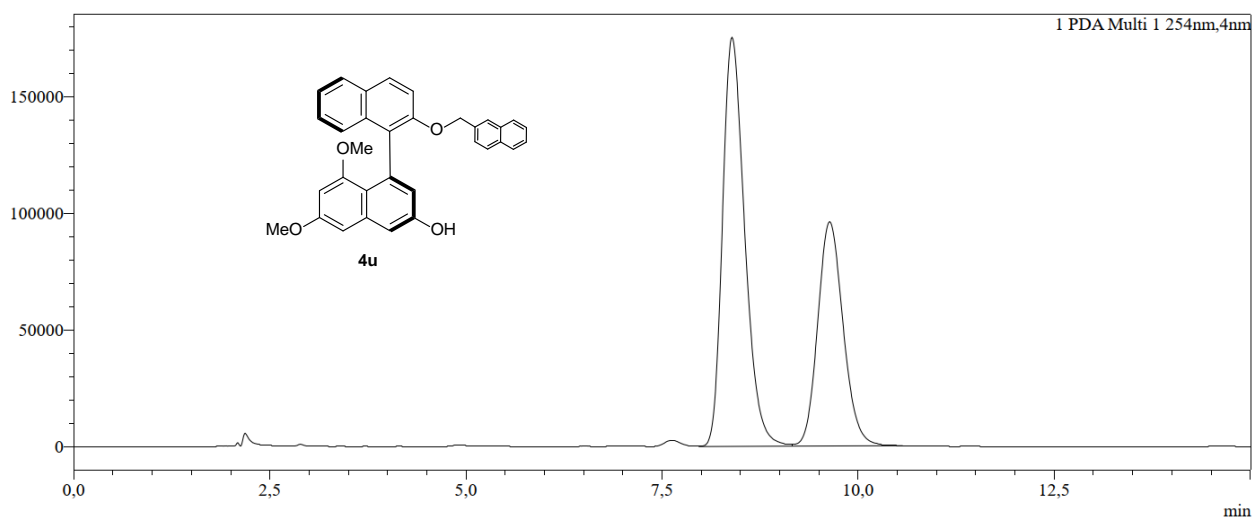

PDA Ch1 254nm

| Peak# | Ret. Time | Area    | Height | Area%   |
|-------|-----------|---------|--------|---------|
| 1     | 8.394     | 3453395 | 175325 | 61.452  |
| 2     | 9.638     | 2166304 | 96115  | 38.548  |
| Total |           | 5619699 | 271440 | 100.000 |



## Compound 7

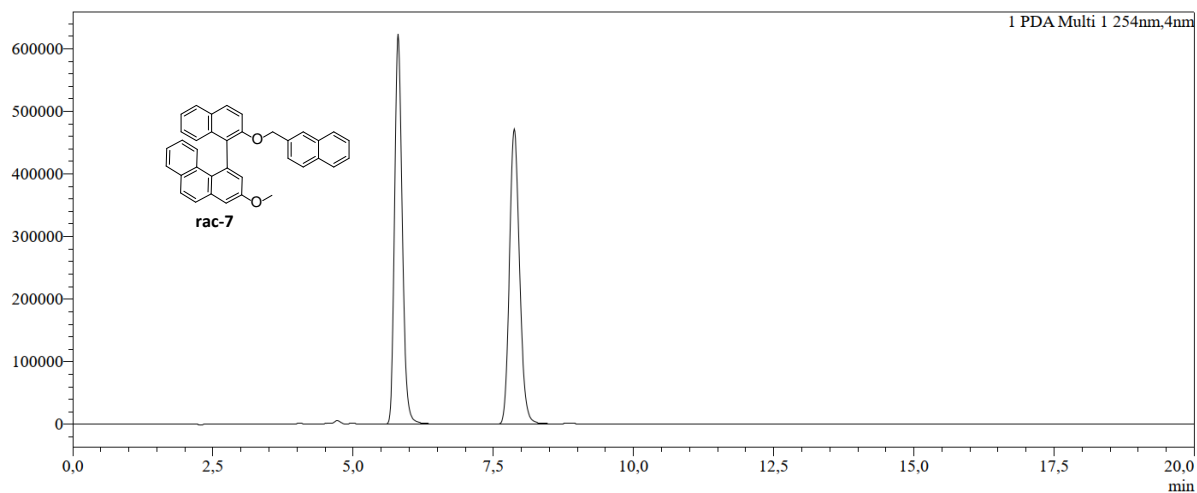

PDA Ch1 254nm

| Peak# | Ret. Time | Area     | Height  | Area%   |
|-------|-----------|----------|---------|---------|
| 1     | 5.801     | 5969002  | 623144  | 50.161  |
| 2     | 7.873     | 5930711  | 471587  | 49.839  |
| Total |           | 11899712 | 1094731 | 100.000 |

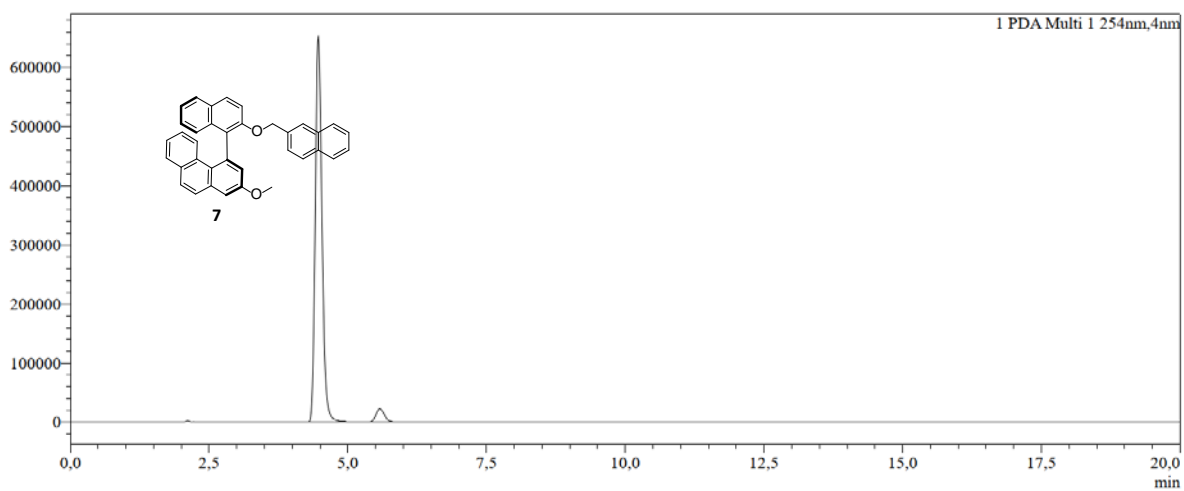

PDA Ch1 254nm

| Peak# | Ret. Time | Area    | Height | Area%   |
|-------|-----------|---------|--------|---------|
| 1     | 4.468     | 5513383 | 653867 | 95.704  |
| 2     | 5.577     | 247460  | 23145  | 4.296   |
| Total |           | 5760843 | 677013 | 100.000 |

# Compound 8

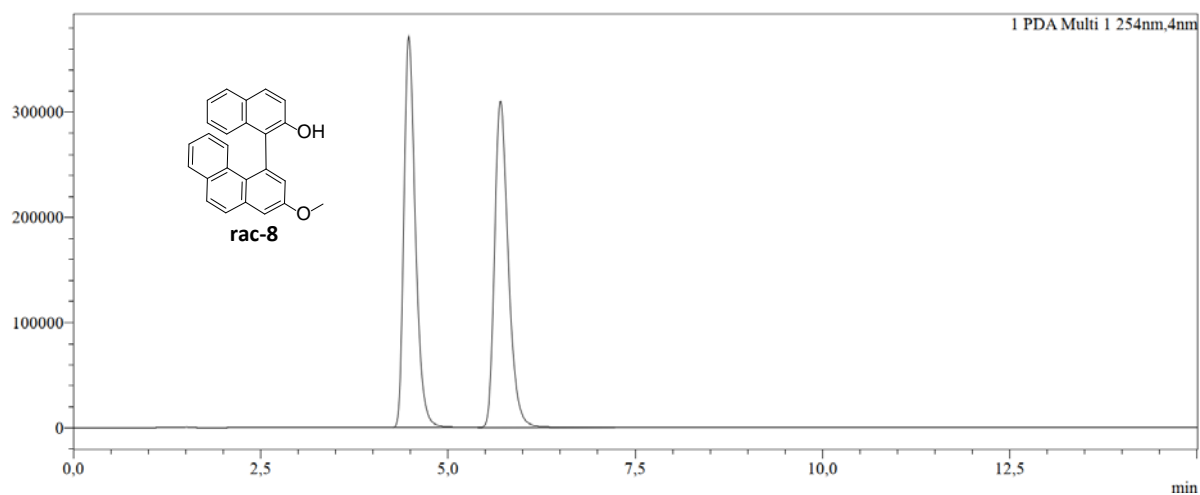

PDA Ch1 254nm

| Peak# | Ret. Time | Area    | Height | Area%   |
|-------|-----------|---------|--------|---------|
| 1     | 4,479     | 3990137 | 372077 | 50,089  |
| 2     | 5,702     | 3975878 | 310275 | 49,911  |
| Total |           | 7966015 | 682352 | 100,000 |

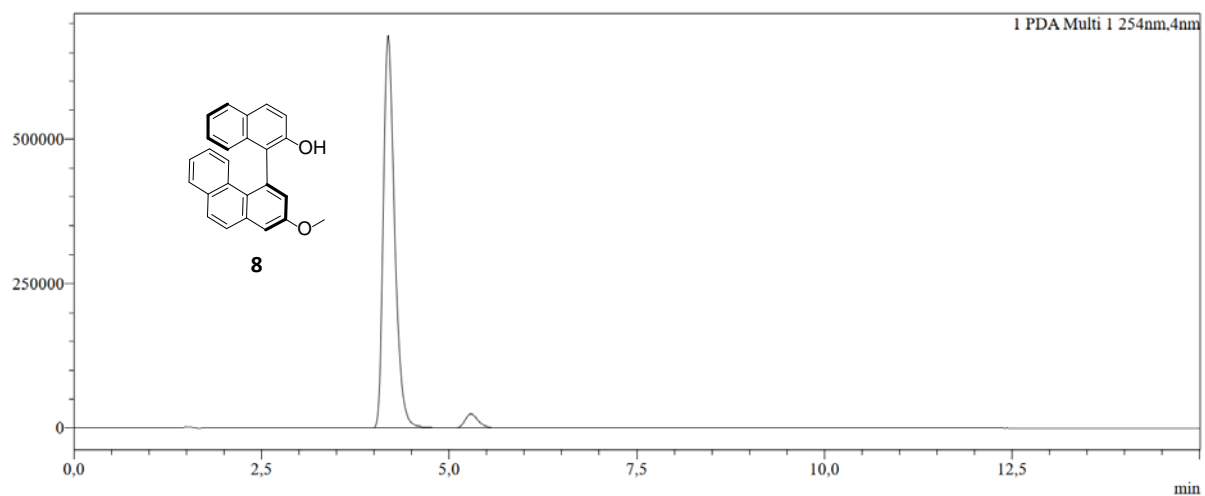

PDA Ch1 254nm

| Peak# | Ret. Time | Area    | Height | Area%   |
|-------|-----------|---------|--------|---------|
| 1     | 4,187     | 7134307 | 678901 | 95,919  |
| 2     | 5,291     | 303507  | 24251  | 4,081   |
| Total |           | 7437814 | 703151 | 100,000 |

# Compound 9

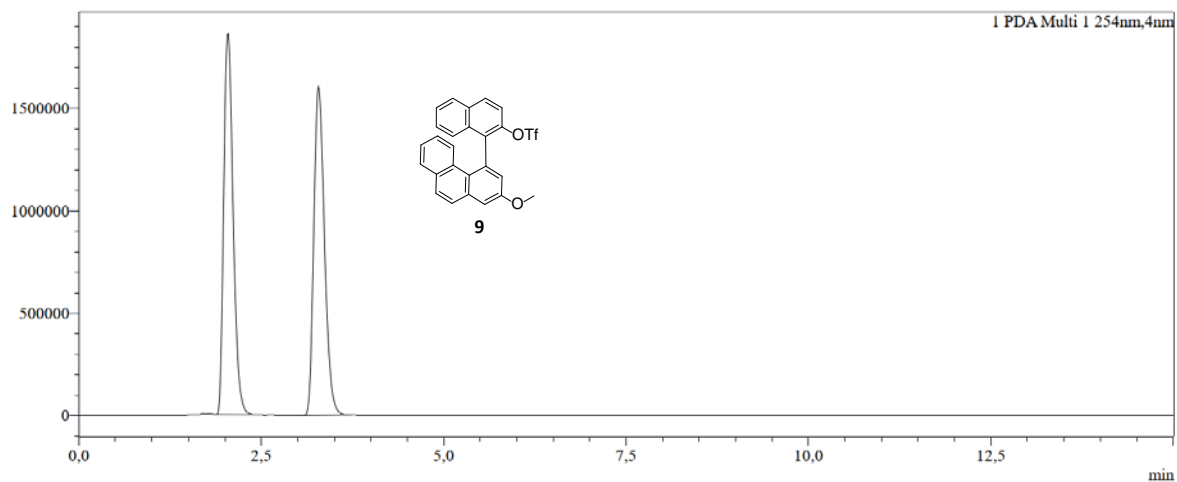

PDA Ch1 254nm

| Peak# | Ret. Time | Area     | Height  | Area%   |
|-------|-----------|----------|---------|---------|
| 1     | 2.043     | 16631864 | 1858563 | 50.487  |
| 2     | 3.286     | 16311318 | 1604675 | 49.513  |
| Total |           | 32943182 | 3463238 | 100.000 |

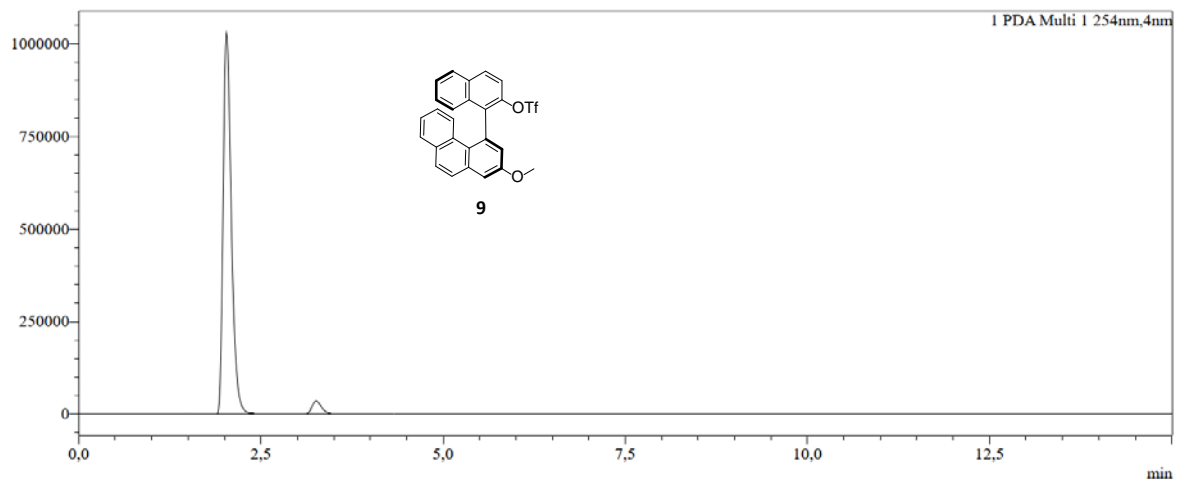

PDA Ch1 254nm

| Peak# | Ret. Time | Area    | Height  | Area%   |
|-------|-----------|---------|---------|---------|
| 1     | 2.030     | 8094972 | 1030047 | 96.141  |
| 2     | 3.260     | 324888  | 34557   | 3.859   |
| Total |           | 8419860 | 1064604 | 100.000 |

# Compound 10

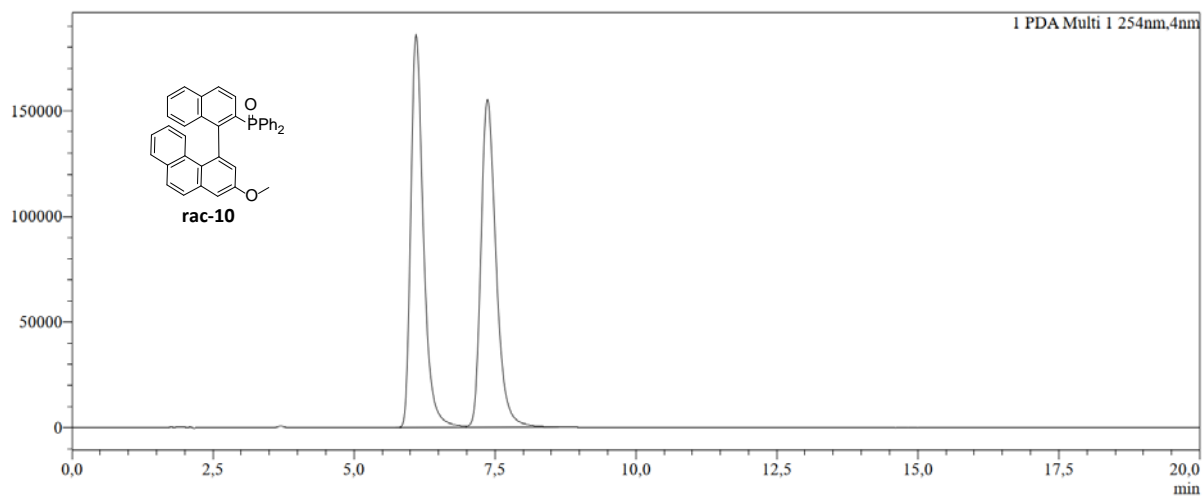

PDA Ch1 254nm

| Peak# | Ret. Time | Area    | Height | Area%   |
|-------|-----------|---------|--------|---------|
| 1     | 6.102     | 2902717 | 185781 | 50.091  |
| 2     | 7.368     | 2892182 | 155105 | 49.909  |
| Total |           | 5794899 | 340886 | 100.000 |

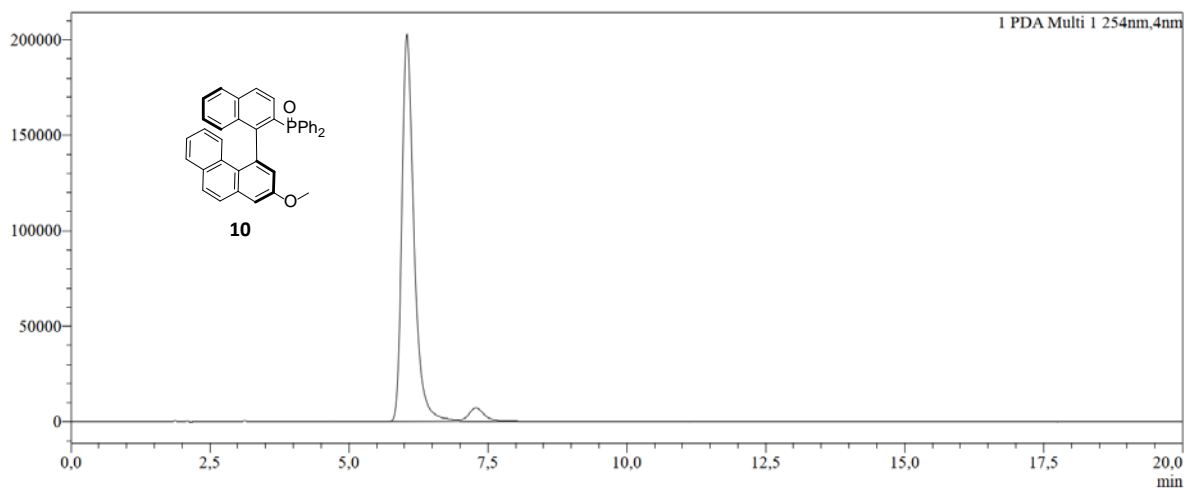

PDA Ch1 254nm

| Peak# | Ret. Time | Area    | Height | Area%   |
|-------|-----------|---------|--------|---------|
| 1     | 6.044     | 3064907 | 202556 | 95.702  |
| 2     | 7.286     | 137658  | 7102   | 4.298   |
| Total |           | 3202565 | 209658 | 100.000 |

# Compound 11

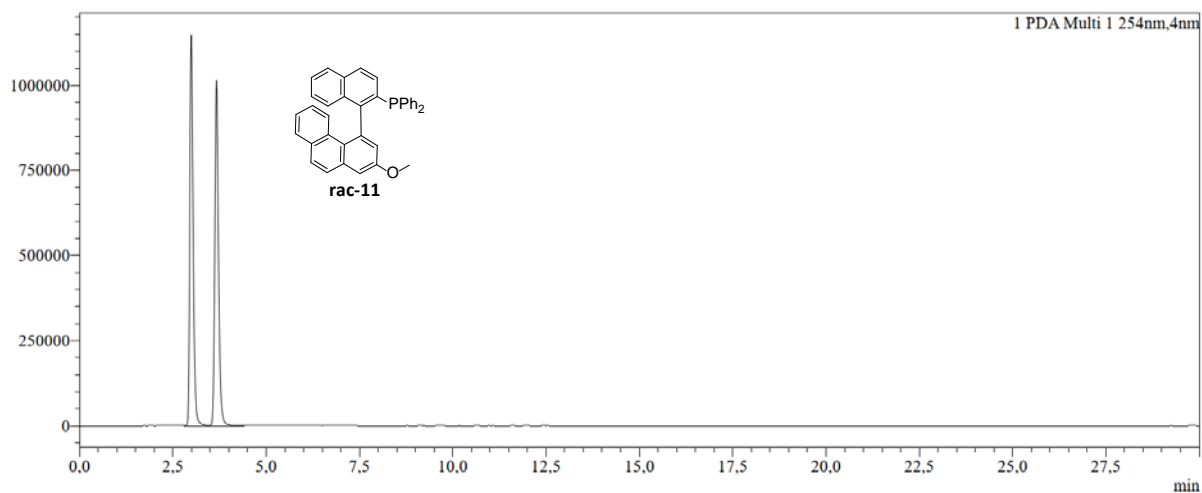

PDA Ch1 254nm

| Peak# | Ret. Time | Area     | Height  | Area%   |
|-------|-----------|----------|---------|---------|
| 1     | 2,993     | 7091191  | 1147363 | 50,271  |
| 2     | 3,669     | 7014860  | 1014532 | 49,729  |
| Total |           | 14106051 | 2161895 | 100,000 |

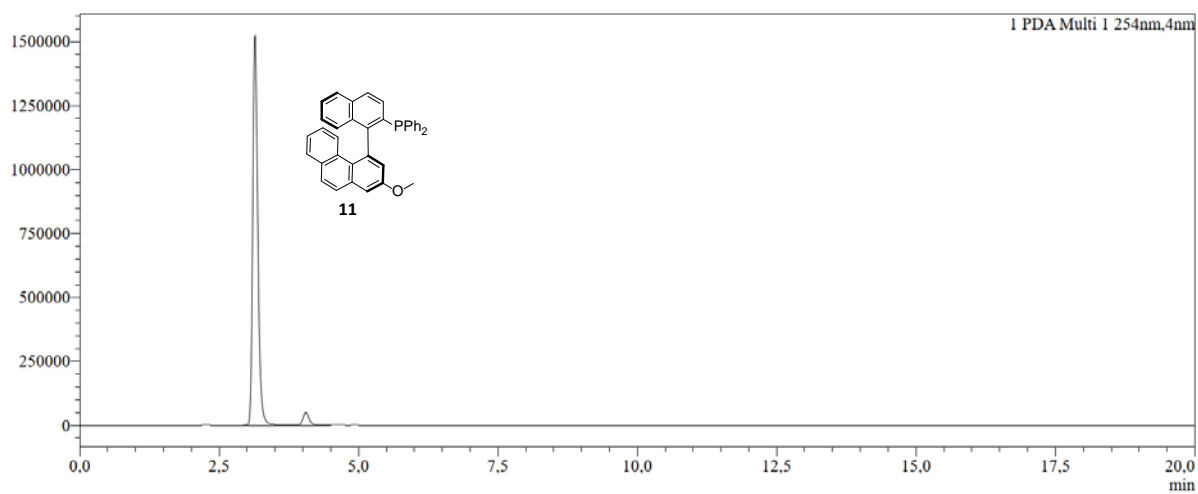

PDA Ch1 254nm

| Peak# | Ret. Time | Area     | Height  | Area%   |
|-------|-----------|----------|---------|---------|
| 1     | 3,142     | 9608746  | 1522610 | 96,032  |
| 2     | 4,054     | 397049   | 50881   | 3,968   |
| Total |           | 10005795 | 1573491 | 100,000 |
